# Supplementary material for: Two rhodamine-azo based fluorescent probes for recognition of trivalent metal ions: crystal structure elucidation and biological applications
Source: Royal Society of Chemistry journal article supplement (doi:10.1039/d2dt00399f), 2022-01-01
Supplement: d2dt00399f1.pdf [file d2dt00399f1.pdf]

## Supporting Information

### **Rhodamine-azo based two fluorescent probes for recognition of trivalent metal ions: crystal structures elucidation and biological application**

Jayanta Mandal,<sup>a</sup> Kunal Pal,<sup>b</sup> Sougata Ghosh Chowdhury,<sup>b</sup> Parimal Karmakar,<sup>b</sup> Anangamohan Panja,<sup>c</sup> Snehasis Banerjee<sup>d</sup> and Amrita Saha<sup>\*a</sup>

<sup>a</sup>Department of Chemistry, Jadavpur University, Kolkata- 700032, India.

E-mail: [amritasahachemju@gmail.com](mailto:amritasahachemju@gmail.com), [amrita.saha@jadavpuruniversity.in](mailto:amrita.saha@jadavpuruniversity.in), Tel. +91-33-24572146

<sup>b</sup>Department of Life Science and Biotechnology, Jadavpur University, Kolkata-700032, India.

<sup>c</sup>Department of Chemistry, Gokhale Memorial Girls' College, 1/1 Harish Mukherjee Road, Kolkata-700020, India.

<sup>d</sup>Department of Higher Education, University Branch, Bikash Bhavan, Salt Lake, Sector-3, Kolkata, 700091, India

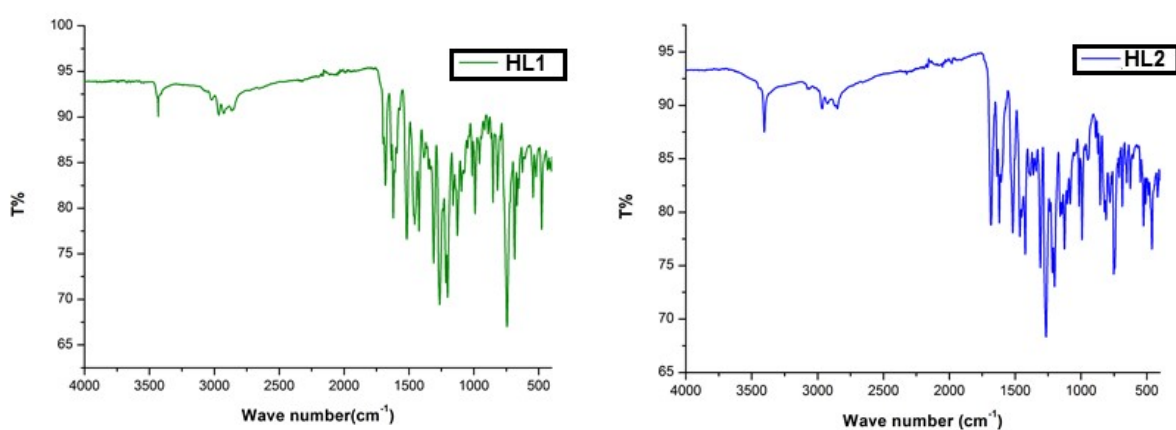

**Fig. S1** FTIR spectra of chemosensor **HL1** and **HL2**.

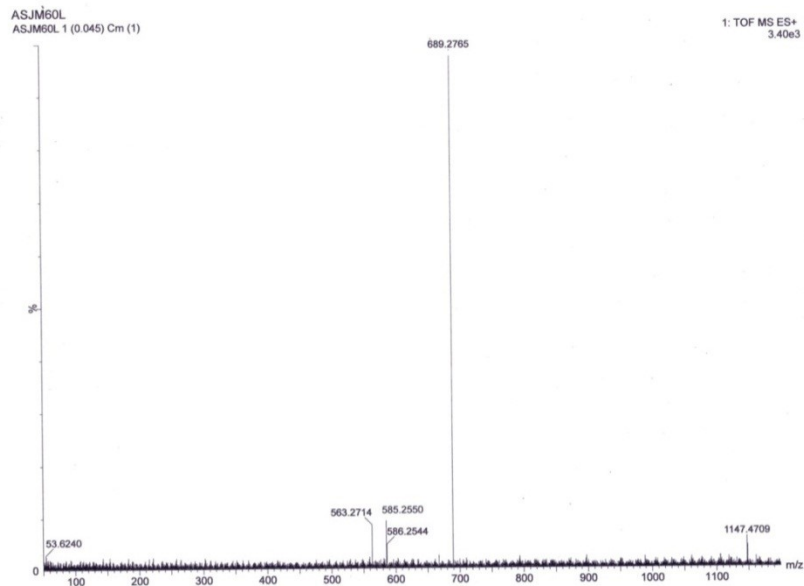

Fig. S2 ESI-mass spectrum of chemosensor **HL1**

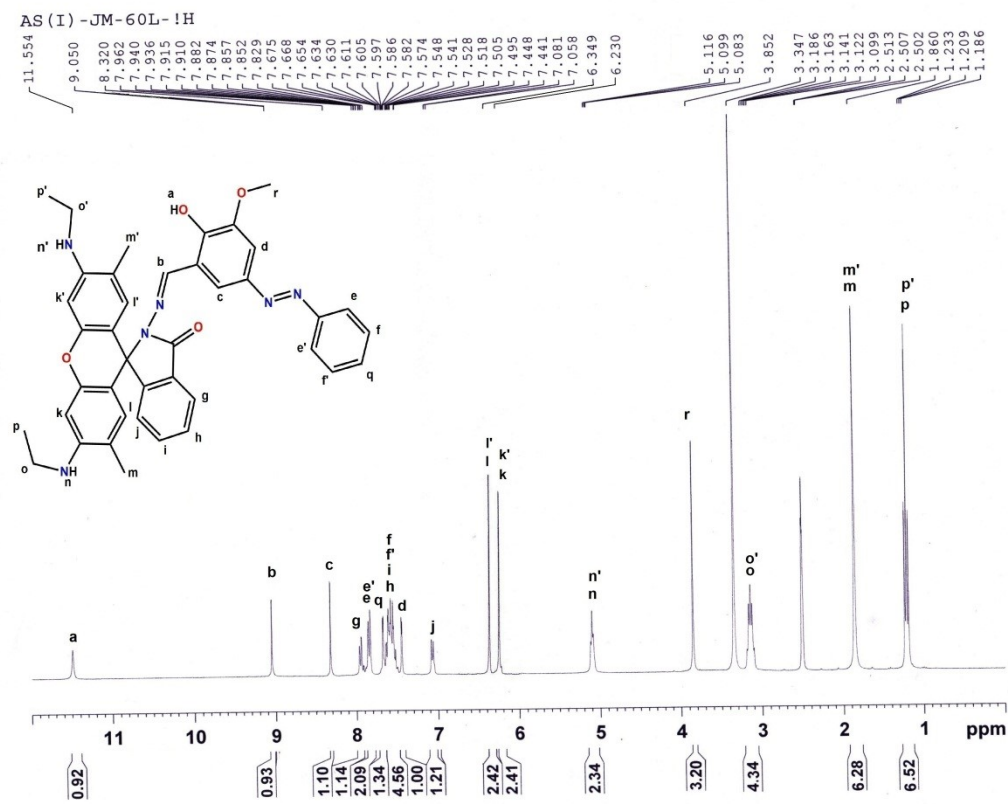

Fig. S3(a)  $^1\text{H-NMR}$  spectrum of the chemosensor **HL1** in  $\text{DMSO-d}_6$  recorded on a 300 MHz Bruker NMR spectrometer.

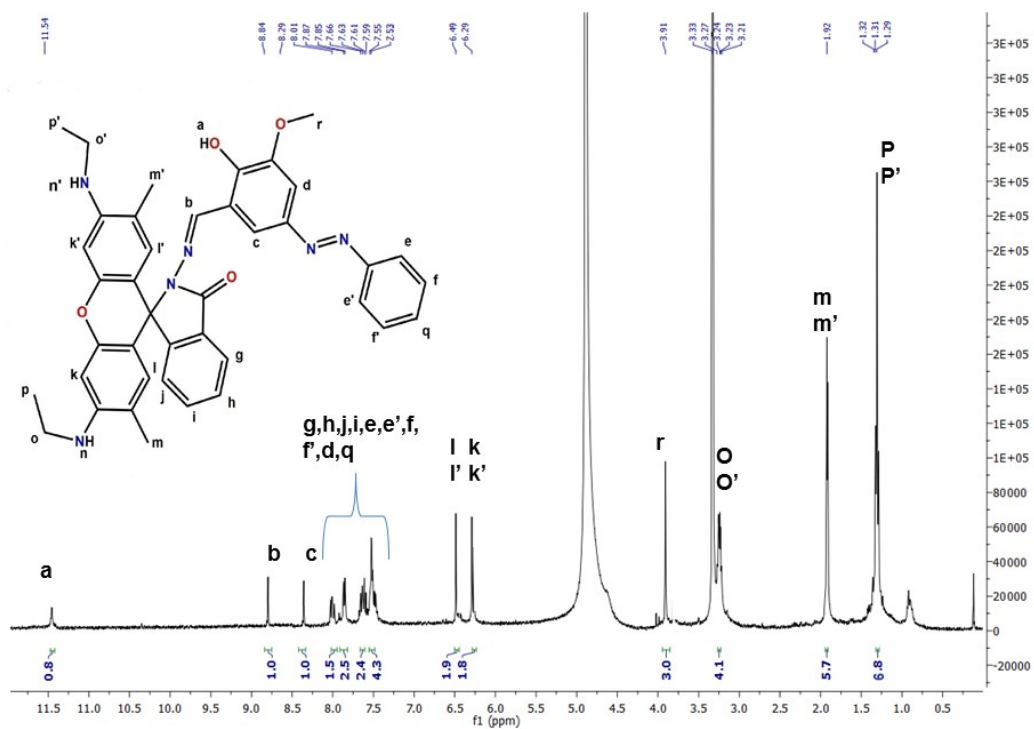

**Fig. S3(b)** <sup>1</sup>H-NMR spectrum of the chemosensor **HL1** in CD<sub>3</sub>OD recorded on a 400 MHz Bruker NMR spectrometer.

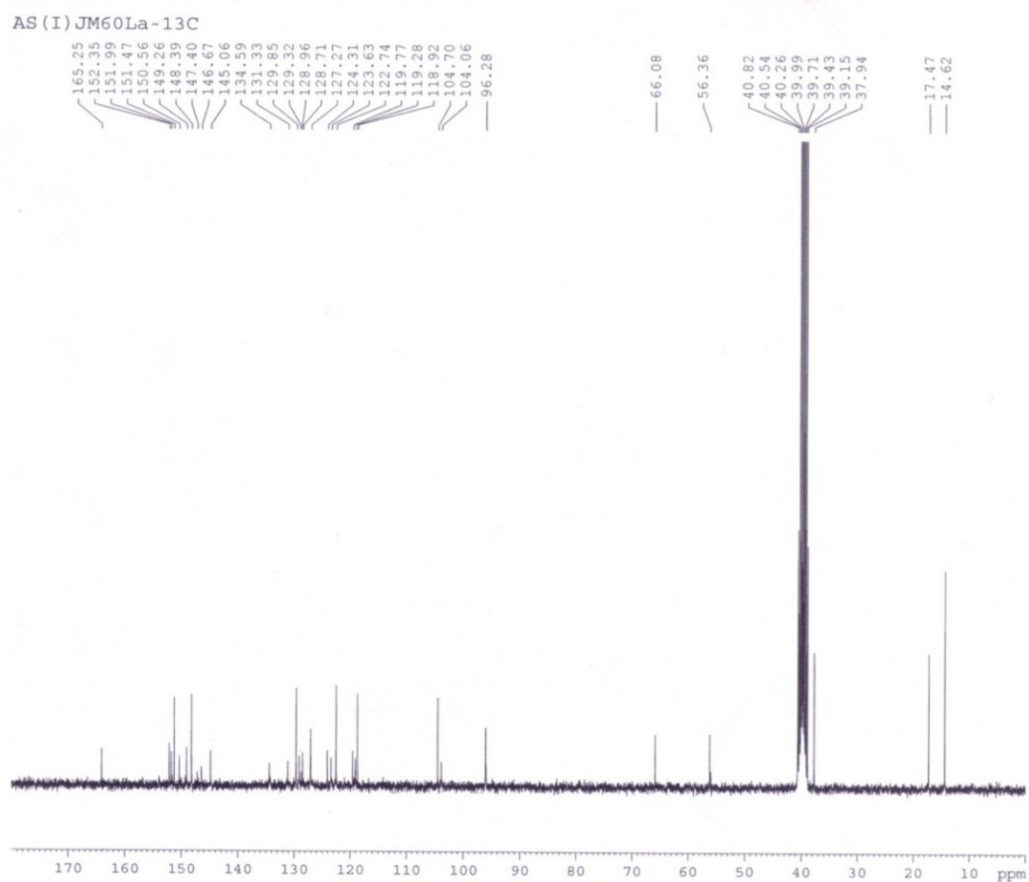

**Fig. S4** <sup>13</sup>C NMR spectrum of **HL1** in DMSO-d<sub>6</sub>.

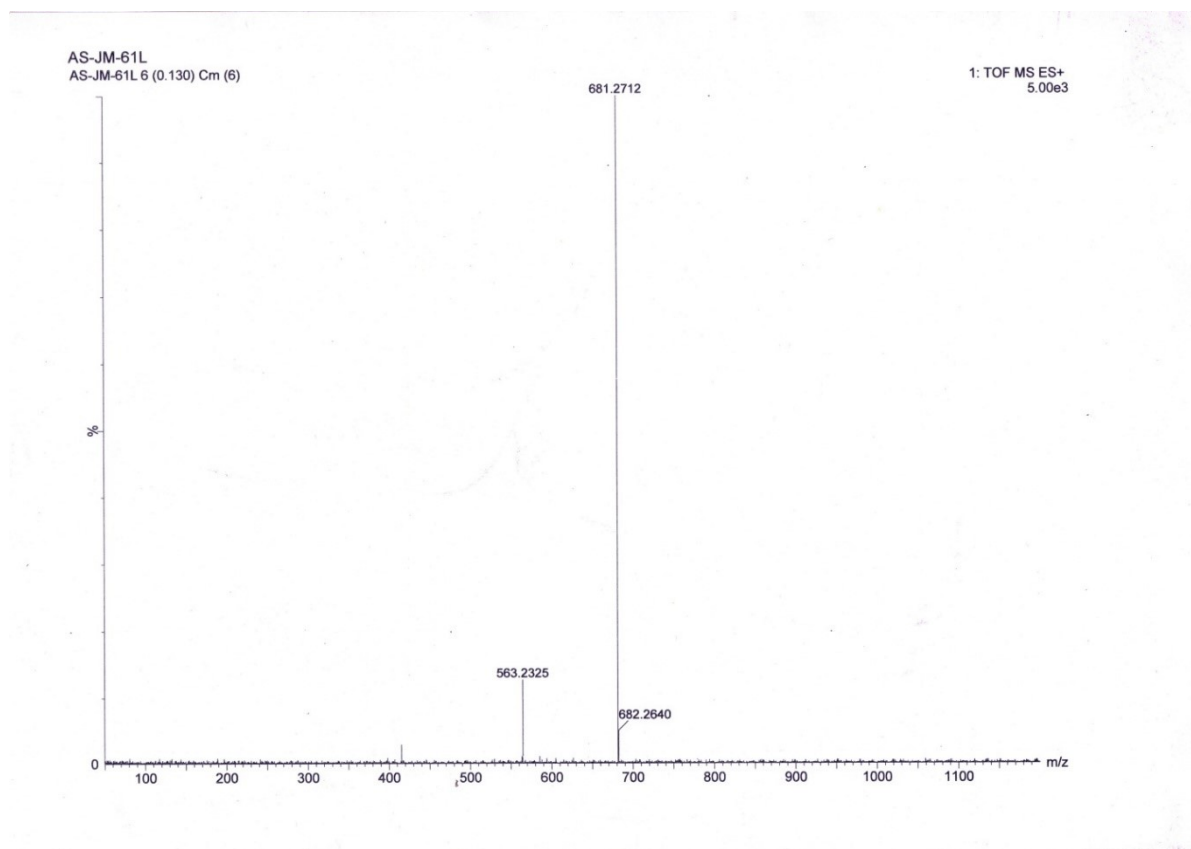

Fig. S5 ESI-mass spectrum of chemosensor **HL2**.

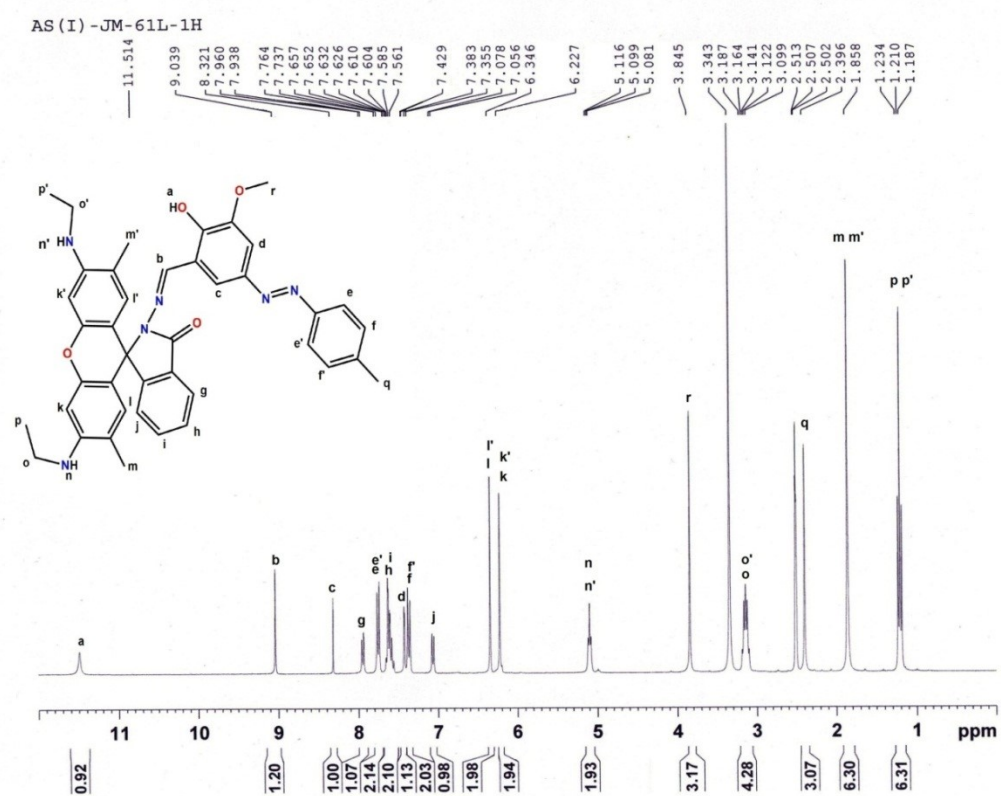

Fig. S6(a)  $^1\text{H-NMR}$  spectrum of the chemosensor **HL2** in  $\text{DMSO-d}_6$  recorded on a 300 MHz Bruker NMR spectrometer.



**Fig. S7**  $^{13}\text{C}$  NMR spectrum of **HL2** in  $\text{DMSO-d}_6$ .

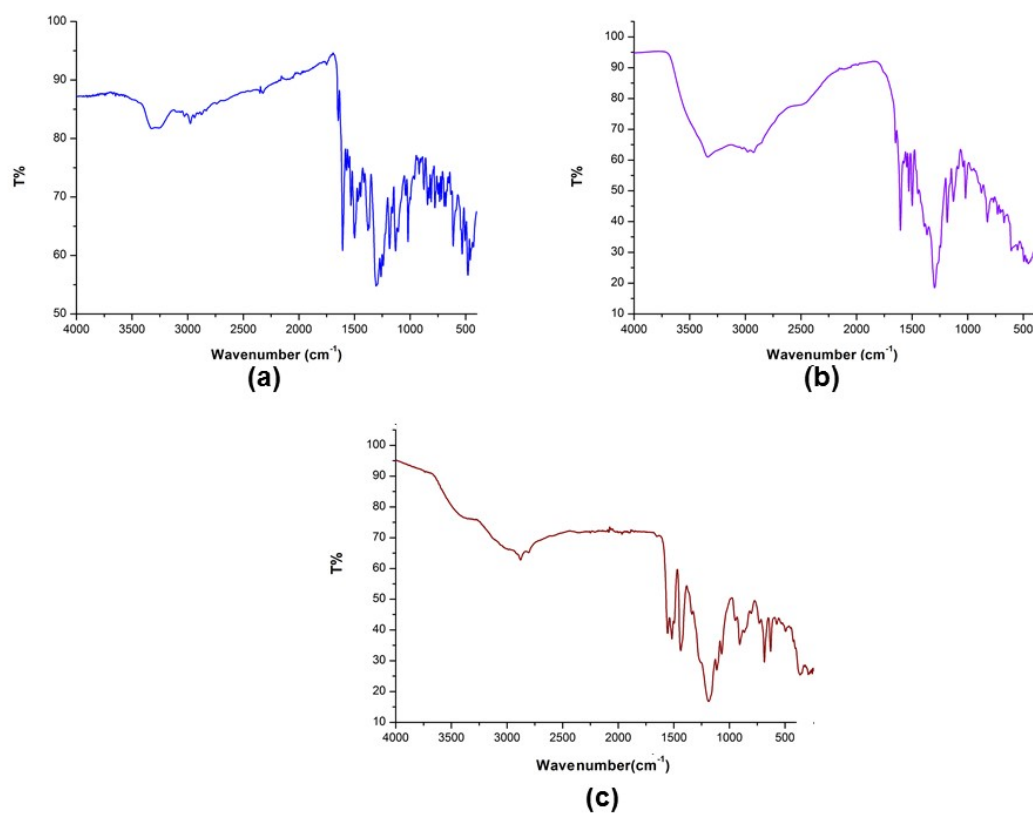

**Fig. S8** FTIR spectra of (a) complex 1, (b) complex 2 and (c) complex 3.

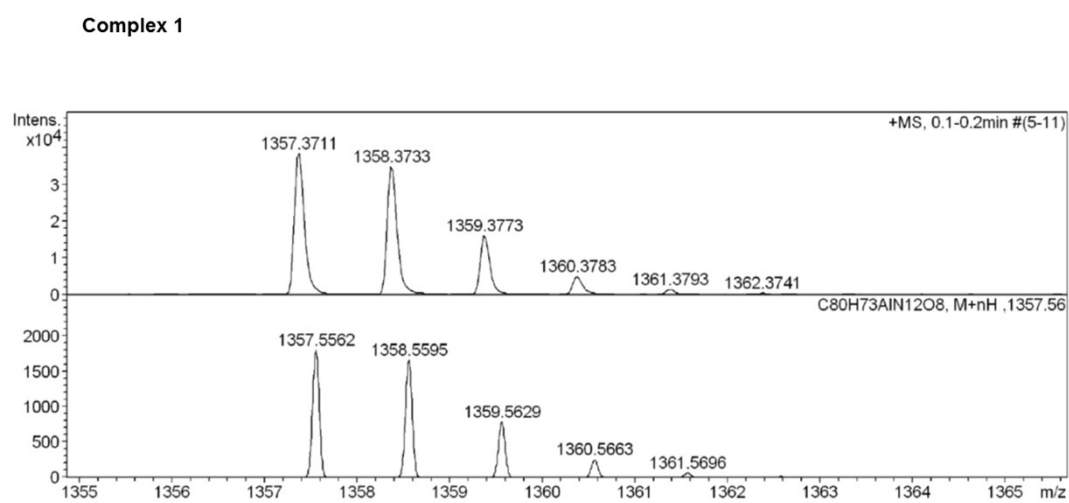

**Fig. S9 (a)** ESI-mass spectrum of  $[\text{Al}(\text{L1})_2]^+$  (complex 1).



Complex 1

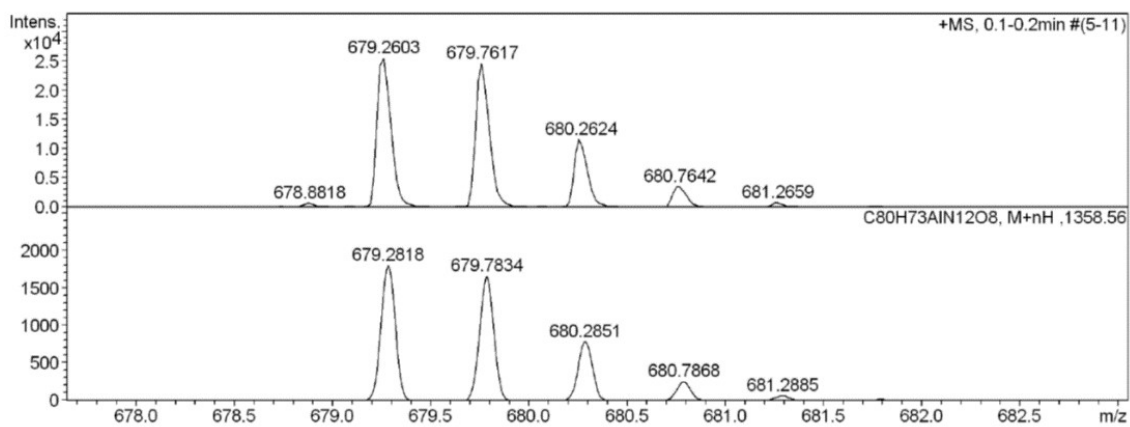

Fig. S9 (b) ESI-mass spectrum of  $[Al(L1)_2 + H]^2+$  (complex 1).

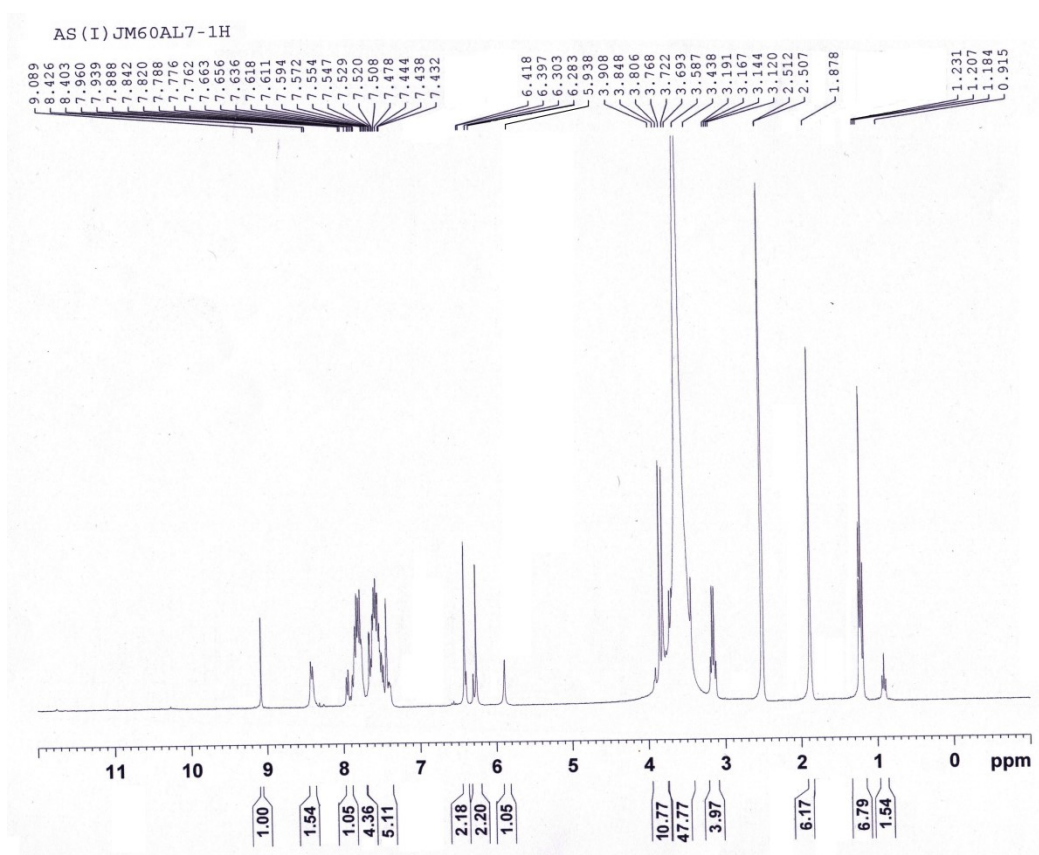

Fig. S10(a) <sup>1</sup>H-NMR spectrum of complex 1 in DMSO-d<sub>6</sub> recorded on a 300 MHz Bruker NMR spectrometer.

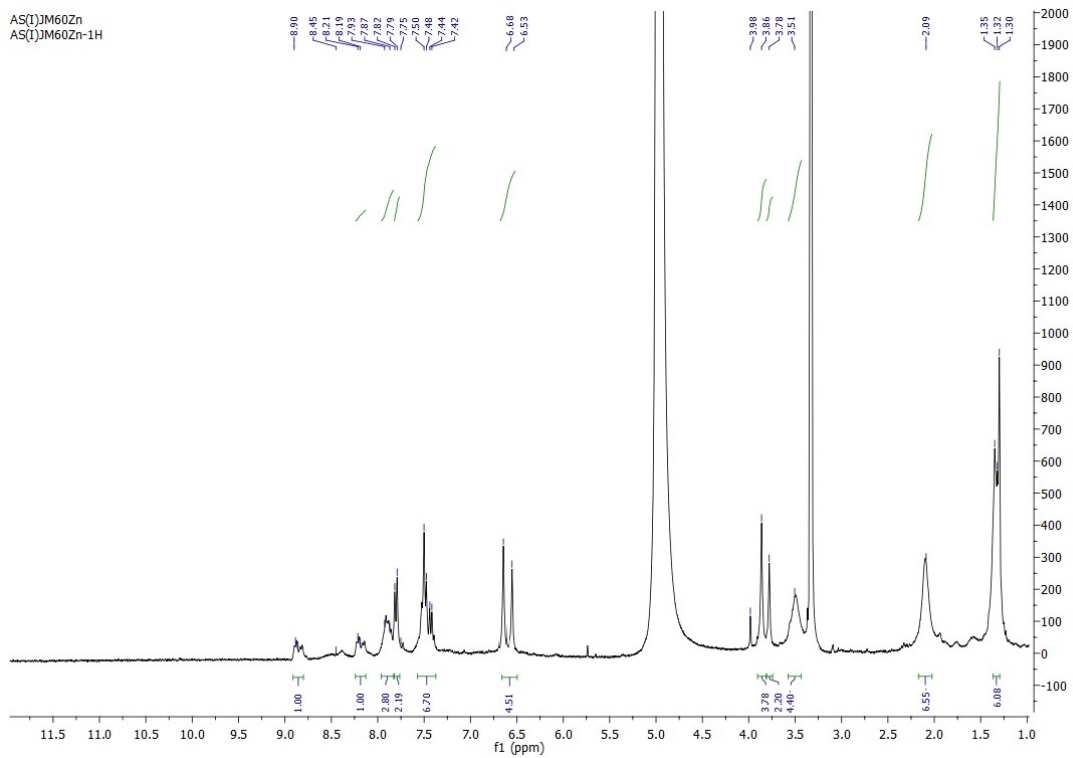

**Fig. S10(b)**  $^1\text{H-NMR}$  spectrum of complex **1** in  $\text{CD}_3\text{OD}$  recorded on a 400 MHz Bruker NMR spectrometer.

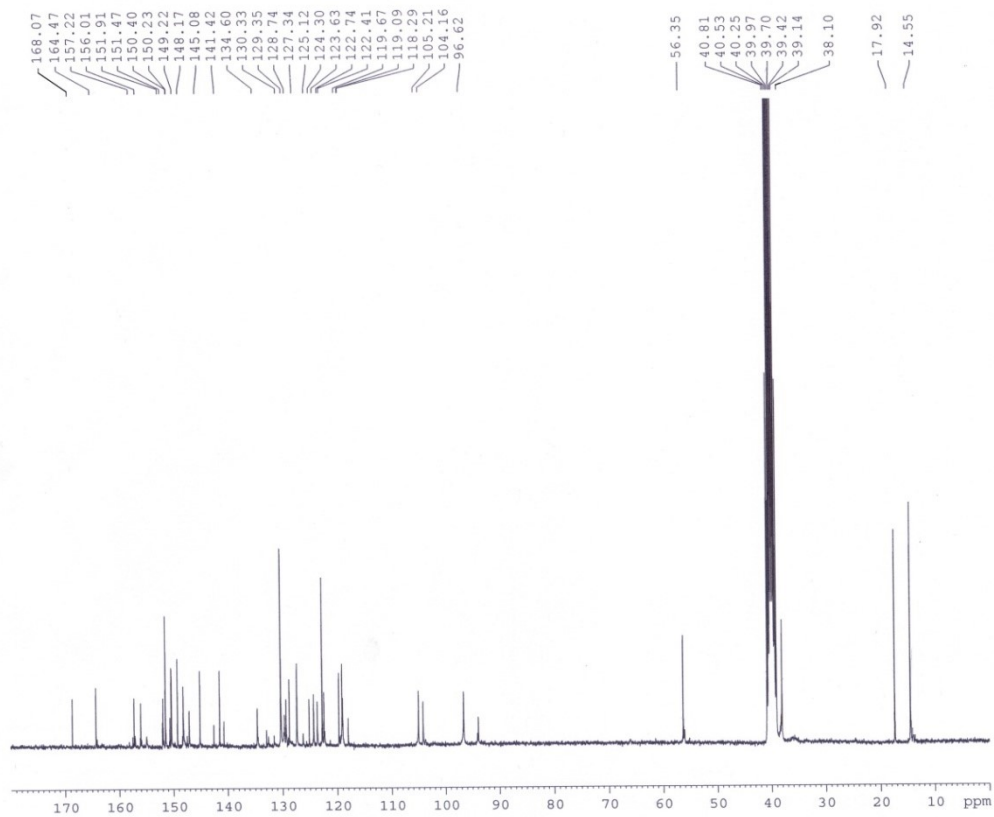

**Fig. S11**  $^{13}\text{C-NMR}$  spectrum of complex **1** in  $\text{DMSO-d}_6$



**Complex 2**

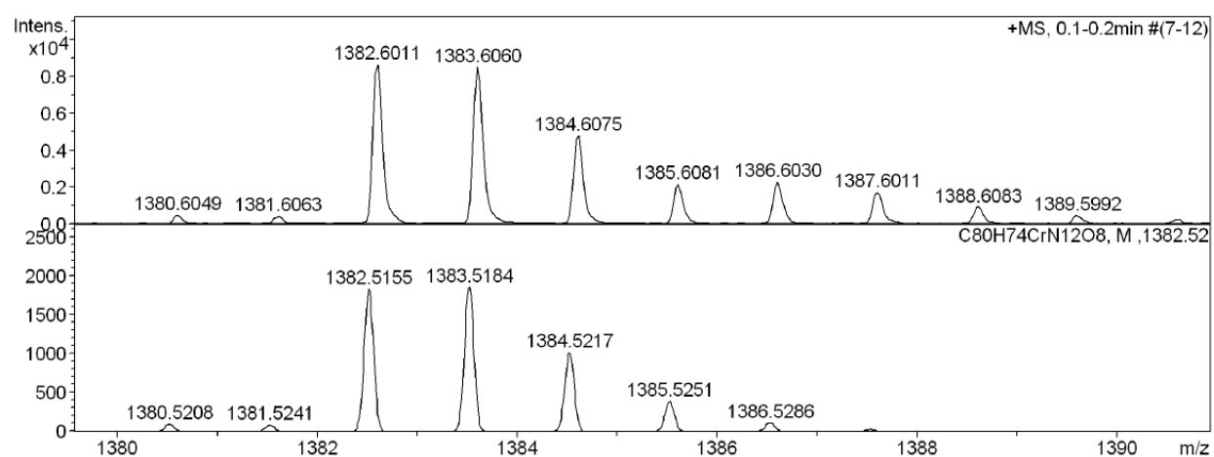

**Fig. S12 (a)** ESI-mass spectrum of  $[\text{Cr}(\text{L1})_2]^+$  (complex 2).

**Complex 2**

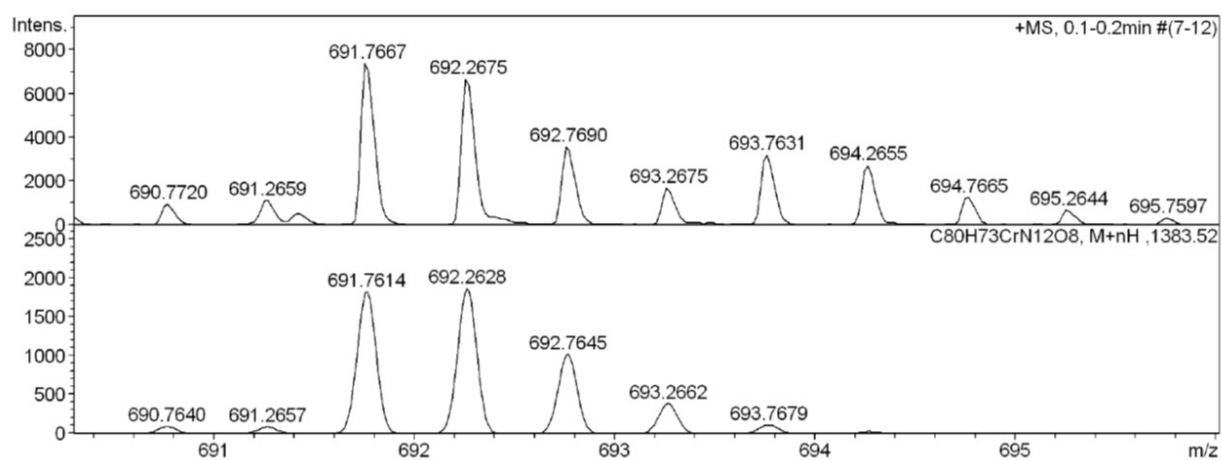

**Fig. S12 (b)** ESI-mass spectrum of  $[\text{Cr}(\text{L1})_2+\text{H}]^{2+}$  (complex 2).

**Complex 3**

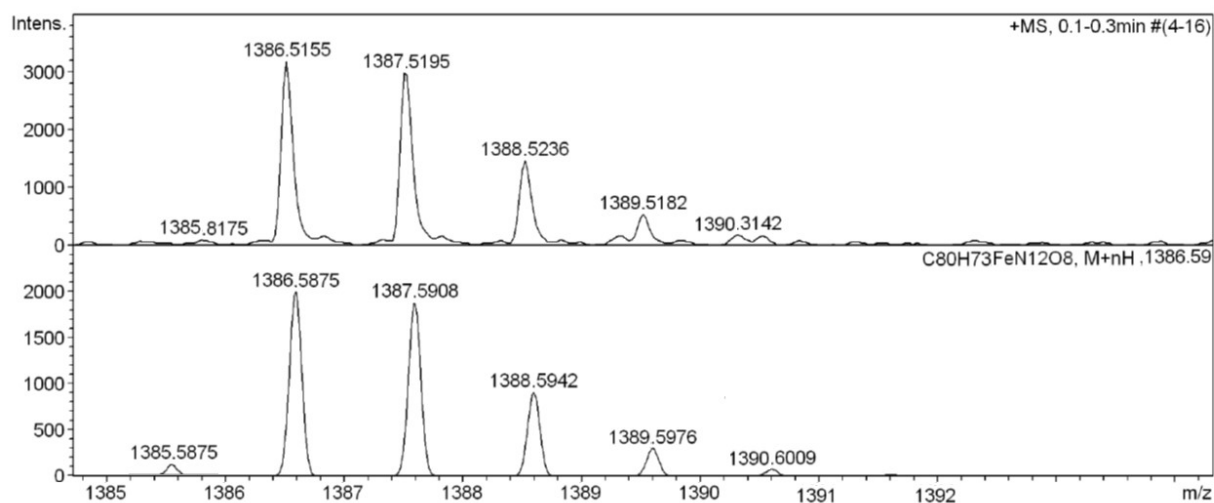

**Fig. S13 (a)** ESI-mass spectrum of  $[\text{Fe}(\text{L1})_2]^+$  (complex 3).

**Complex 3**

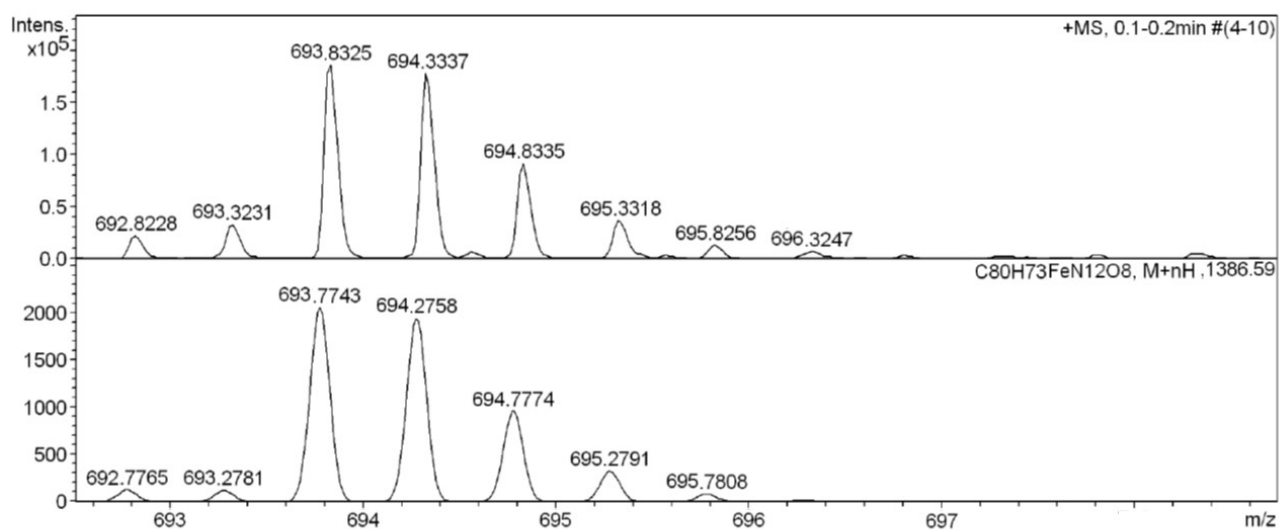

**Fig. S13 (b)** ESI-mass spectrum of  $[\text{Fe}(\text{L1})_2+\text{H}]^{2+}$  (complex 3).

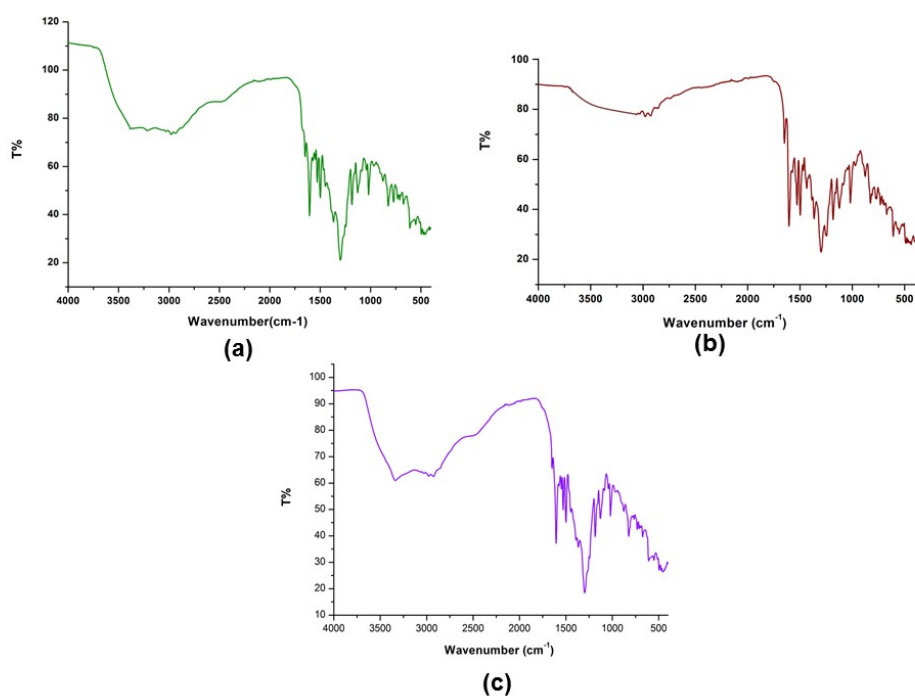

**Fig. S14** FTIR spectra of (a) complex 4, (b) complex 5 and (c) complex 6.

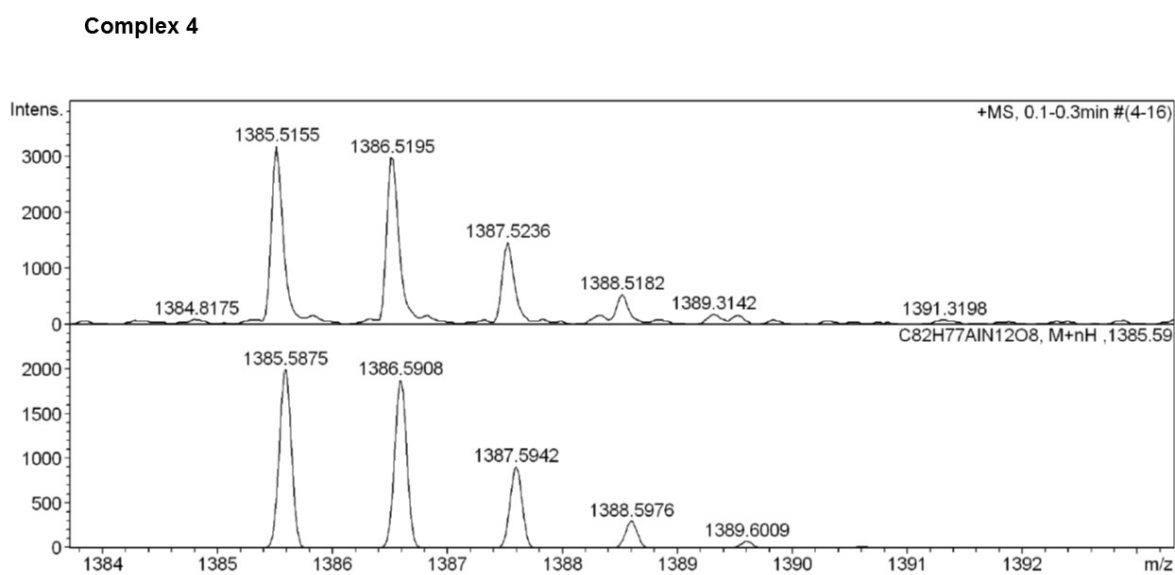

**Fig. S15 (a)** ESI-mass spectrum of  $[Al(L2)_2]^+$  (complex 4).

Complex 4

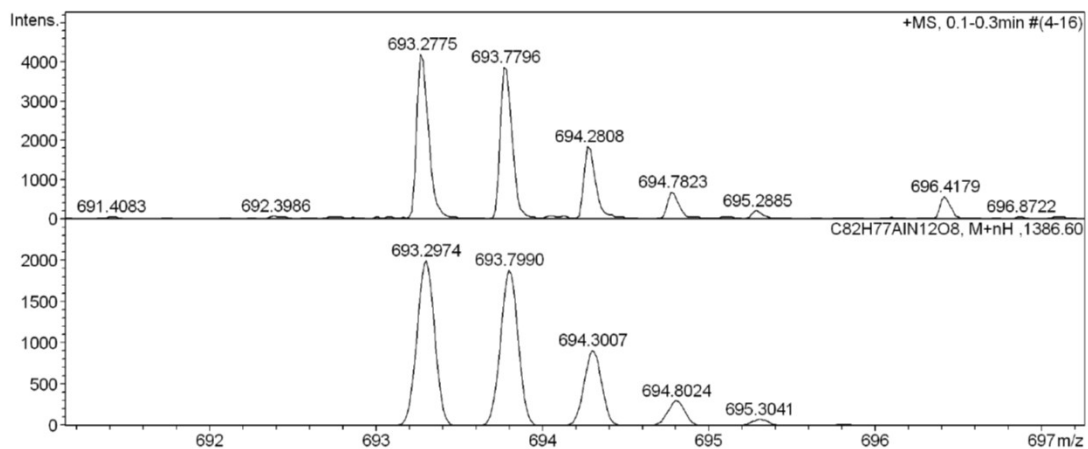

Fig. S15 (b) ESI-mass spectrum of  $[\text{Al}(\text{L}2)_2+\text{H}]^+$  (complex 4).

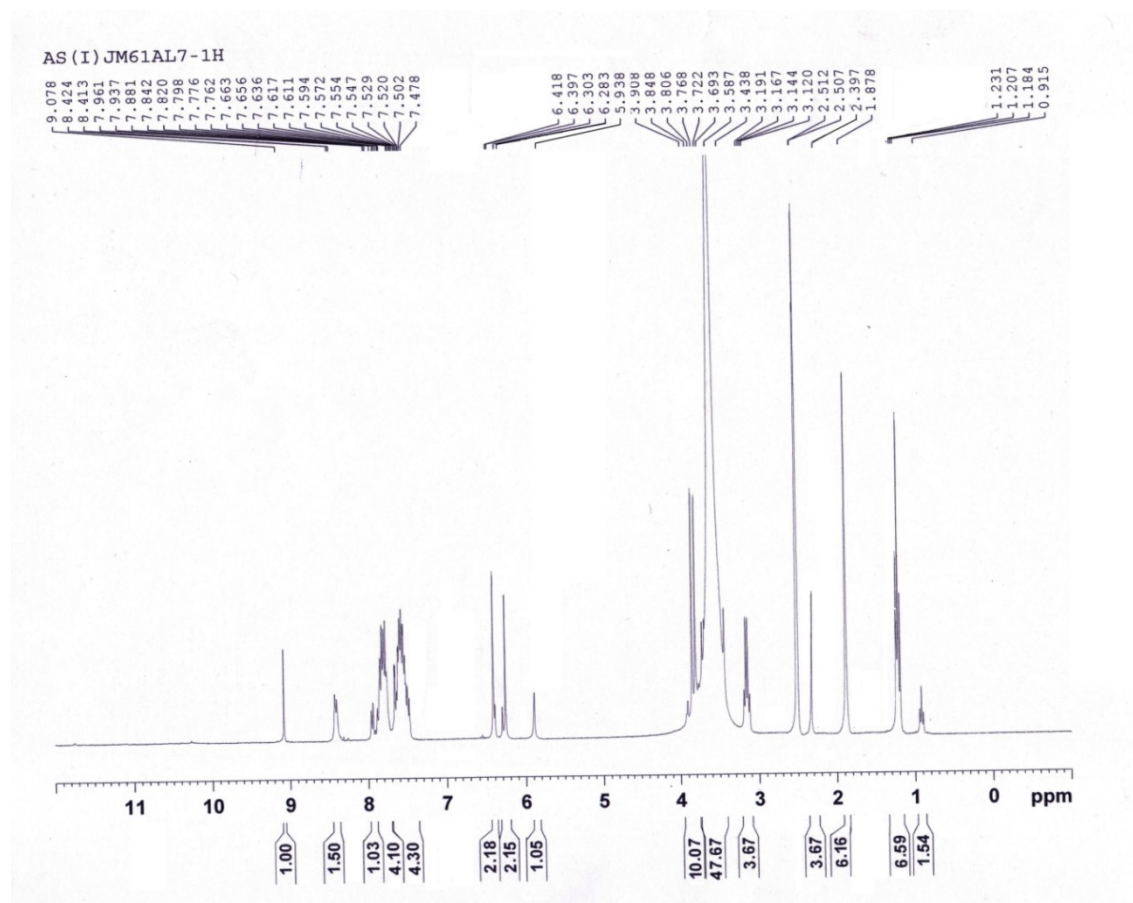

Fig. S16(a)  $^1\text{H}$ -NMR spectrum of complex 4 in  $\text{DMSO-d}_6$  recorded on a 300 MHz Bruker NMR spectrometer.

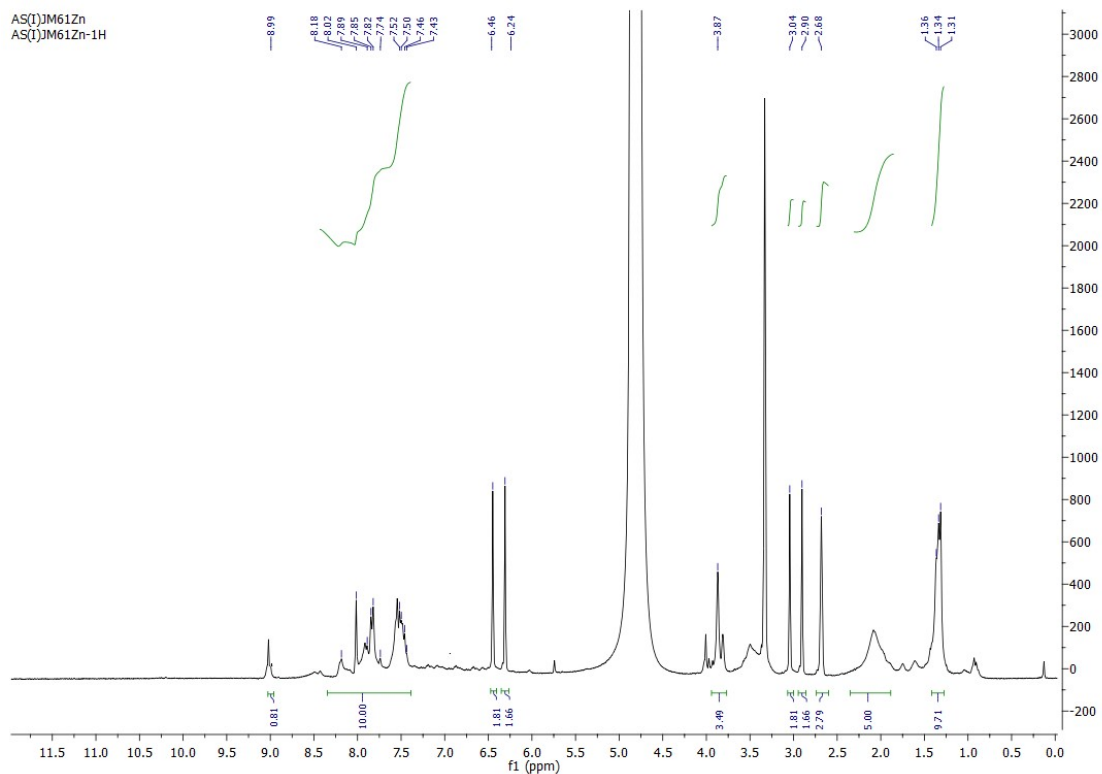

**Fig. S16(b)**  $^1\text{H}$ -NMR spectrum of complex **4** in  $\text{CD}_3\text{OD}$  recorded on a 400 MHz Bruker NMR spectrometer.

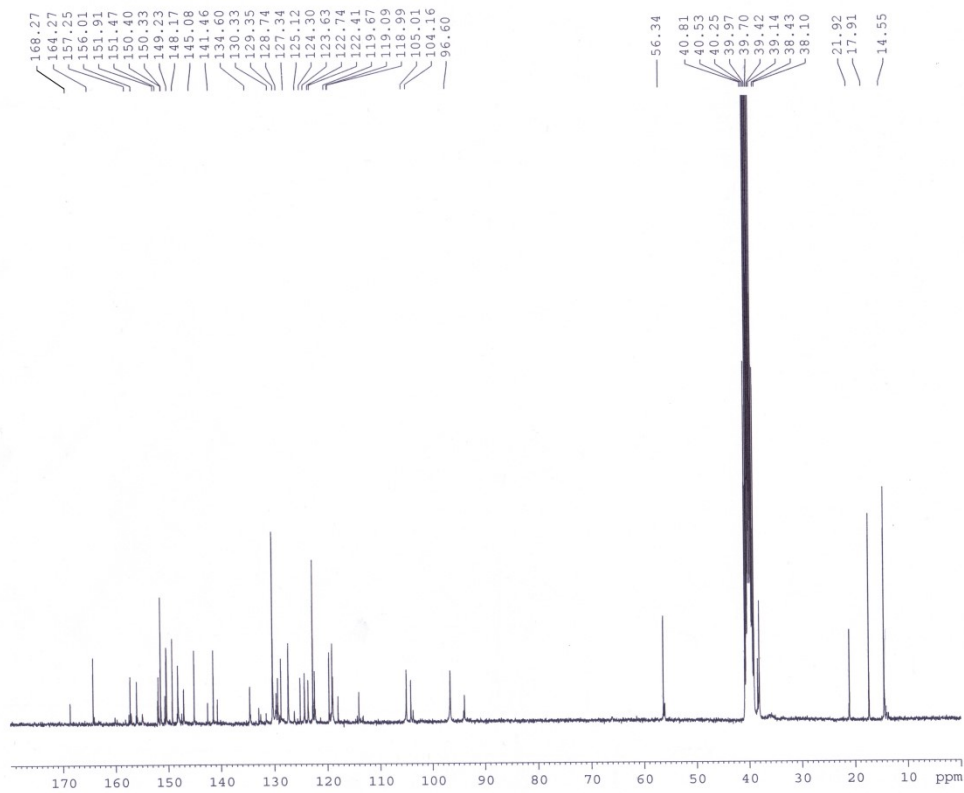

**Fig. S17**  $^{13}\text{C}$  NMR spectrum of complex **4** in  $\text{DMSO-d}_6$

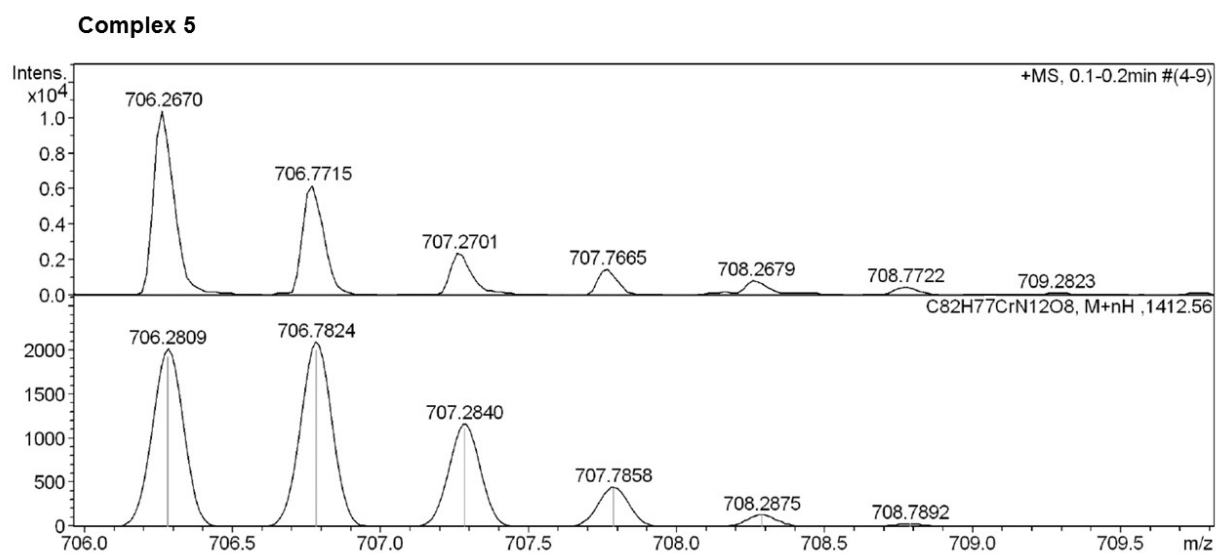

**Fig. S18 (a)** ESI-mass spectrum of  $[\text{Cr}(\text{L}2)_2]^+$  (complex 5).

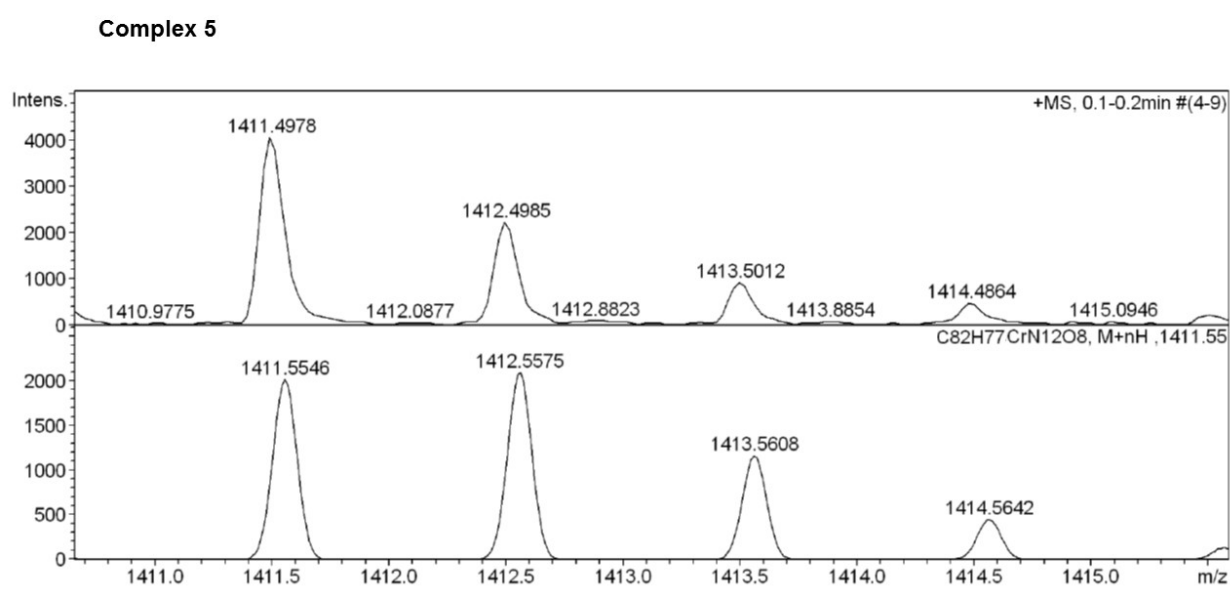

**Fig. S18 (b)** ESI-mass spectrum of  $[\text{Cr}(\text{L}2)_2+\text{H}]^{2+}$  (complex 5).

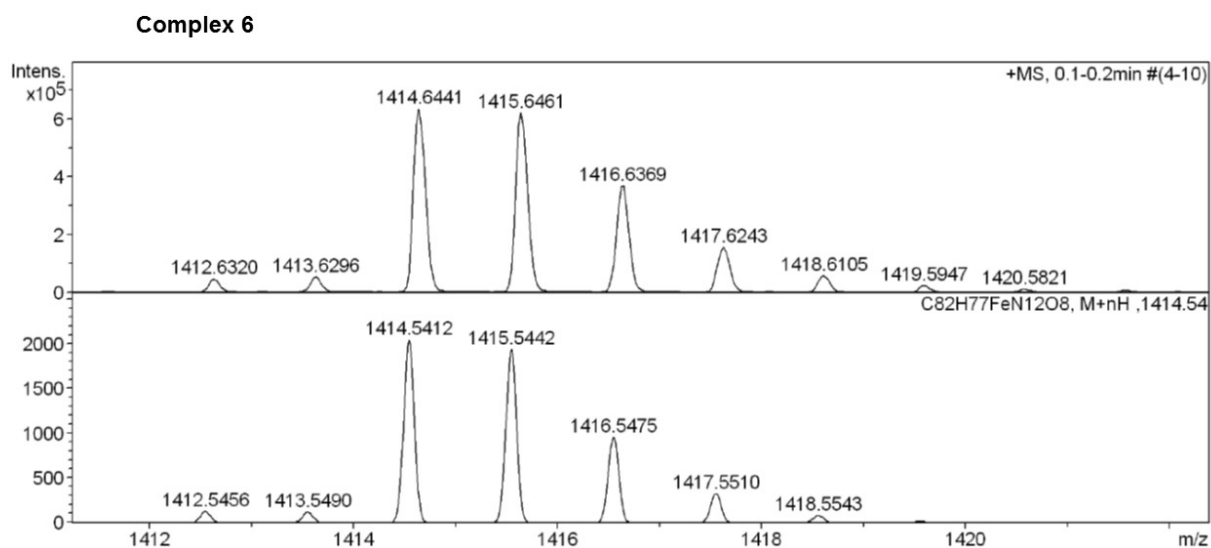

**Fig. S19 (a)** ESI-mass spectrum of  $[\text{Fe}(\text{L}2)_2]^+$  (complex 6).

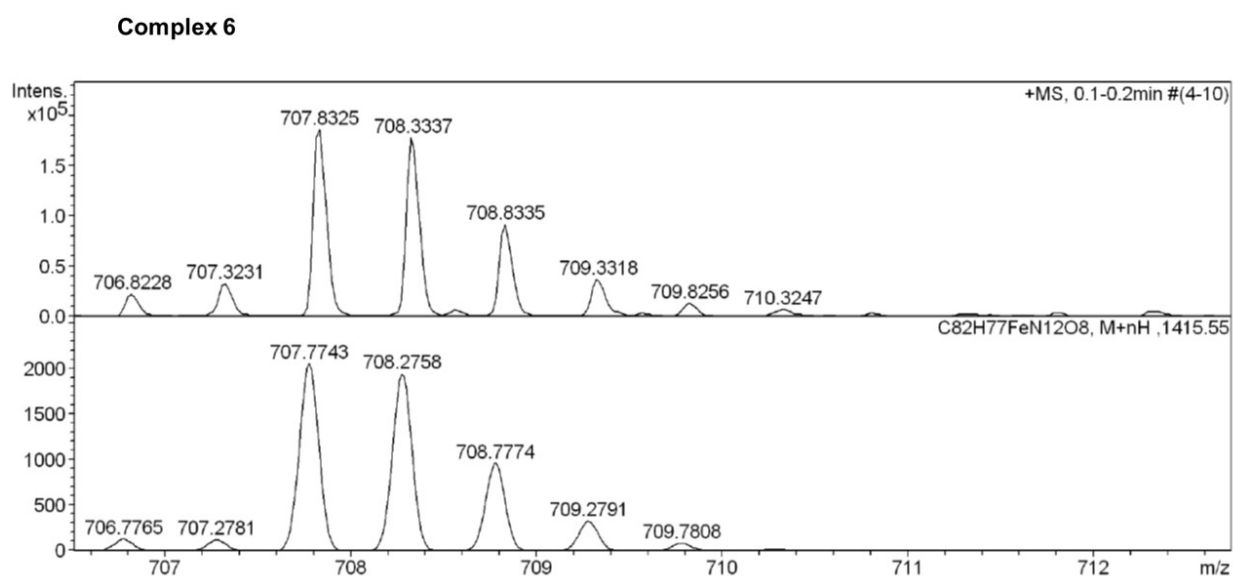

**Fig. S19 (b)** ESI-mass spectrum of  $[\text{Fe}(\text{L}2)_2+\text{H}]^{2+}$  (complex 6).



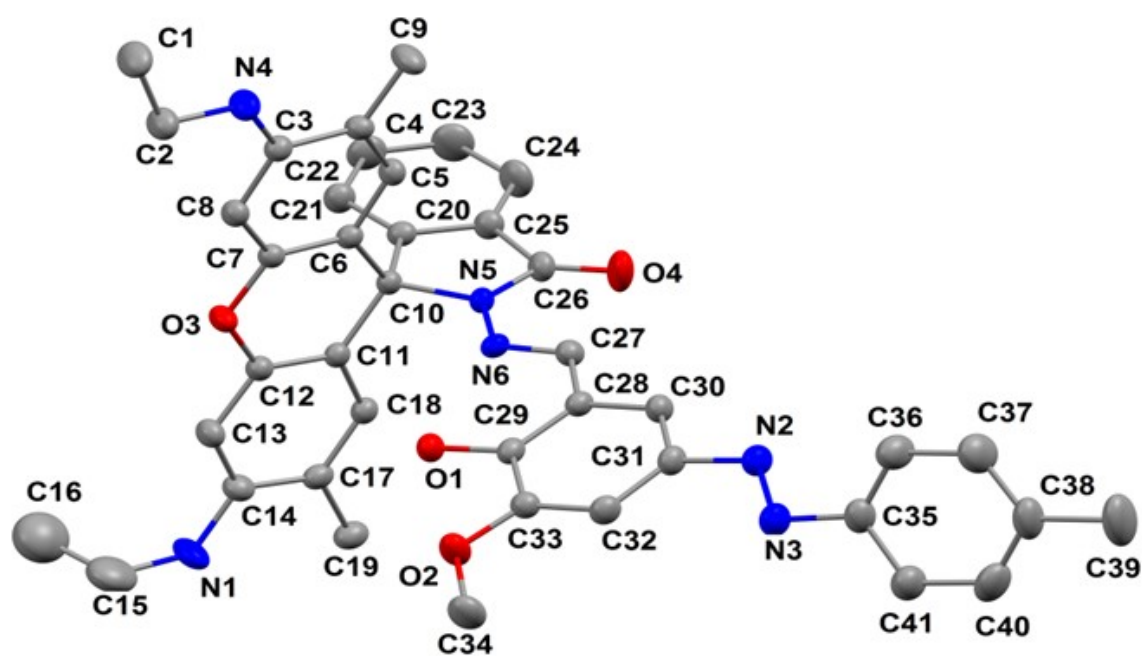

**Fig. S20** Crystal structure of the chemosensor **HL2**. Atoms are shown as 30% thermal ellipsoids.

Here, H and solvent molecule atoms are omitted for clarity.

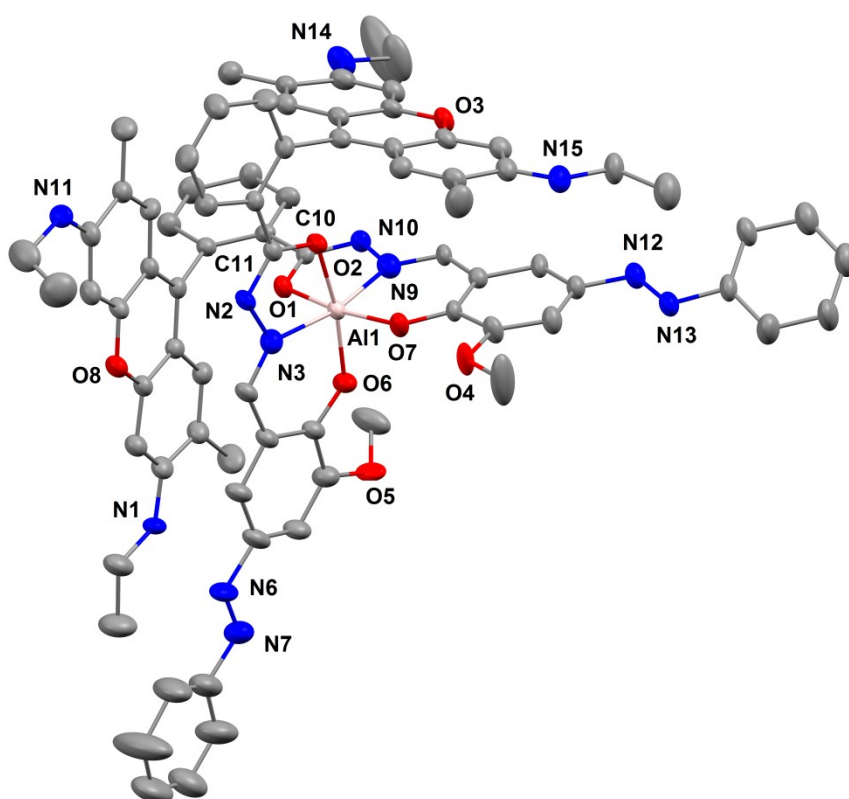

**Fig. S21** Crystal structure of complex cation of **1**. Atoms are shown as 30% thermal ellipsoids.

Here, H atoms are omitted for clarity.

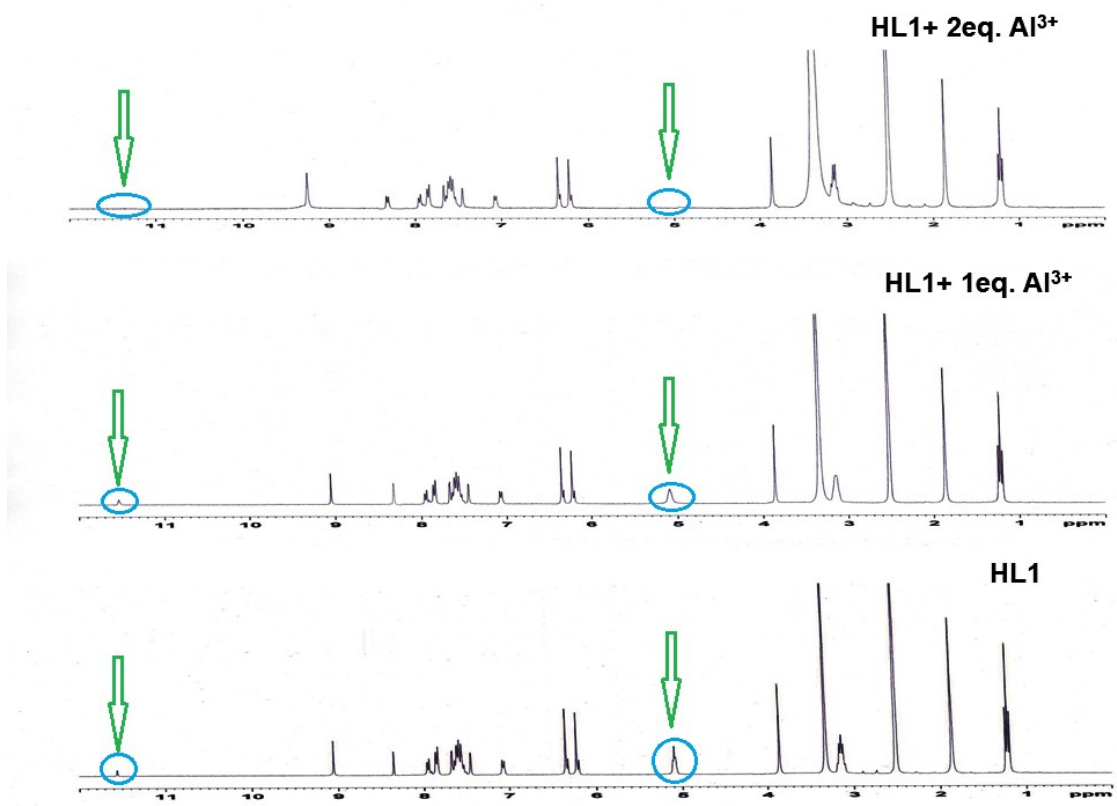

**Fig. S22**  $^1\text{H}$ -NMR titration of the free ligand (**HL1**) and with the addition of 1 and 2 equivalent of  $\text{Al}^{3+}$  in  $\text{DMSO-d}_6$  recorded on a 300 MHz Bruker NMR spectrometer.

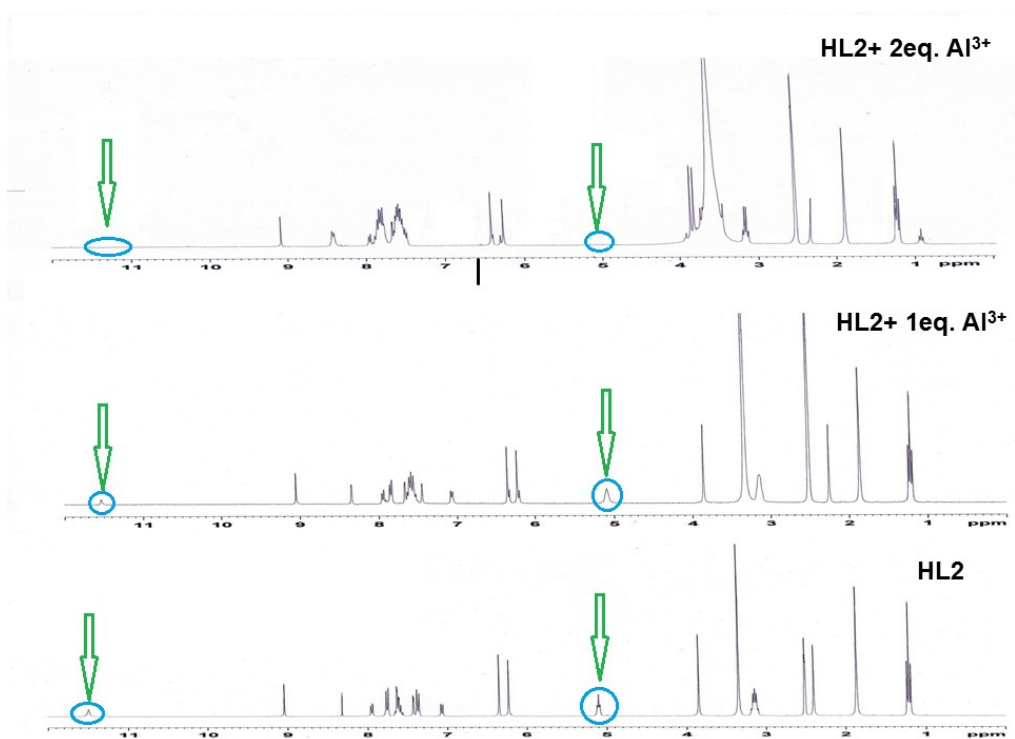

**Fig. 23**  $^1\text{H}$ -NMR titration of the free ligand (**HL2**) and with the addition of 1 and 2 equivalent of  $\text{Al}^{3+}$  in  $\text{DMSO-d}_6$  recorded on a 300 MHz Bruker NMR spectrometer.

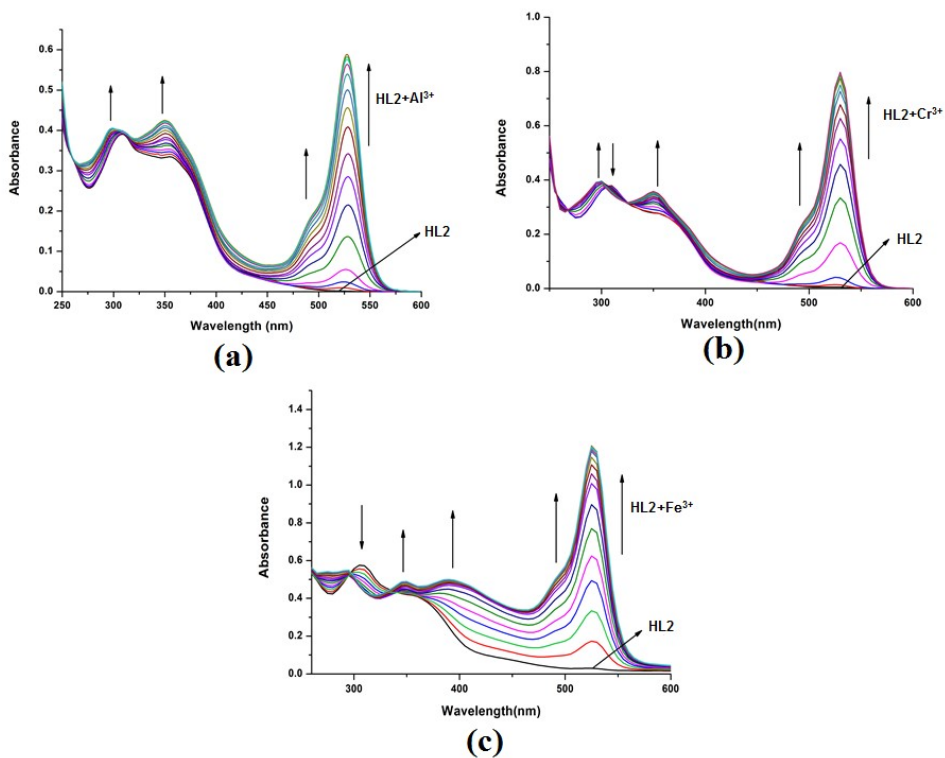

**Fig. S24** Absorption titration study of **HL2** (10 μM) with gradual addition of metal ions ( $\text{Al}^{3+}$ ,  $\text{Cr}^{3+}$  and  $\text{Fe}^{3+}$ ) (a-c) 0-6 μM in 10 mM Britton Robinson buffer at pH 7.4.

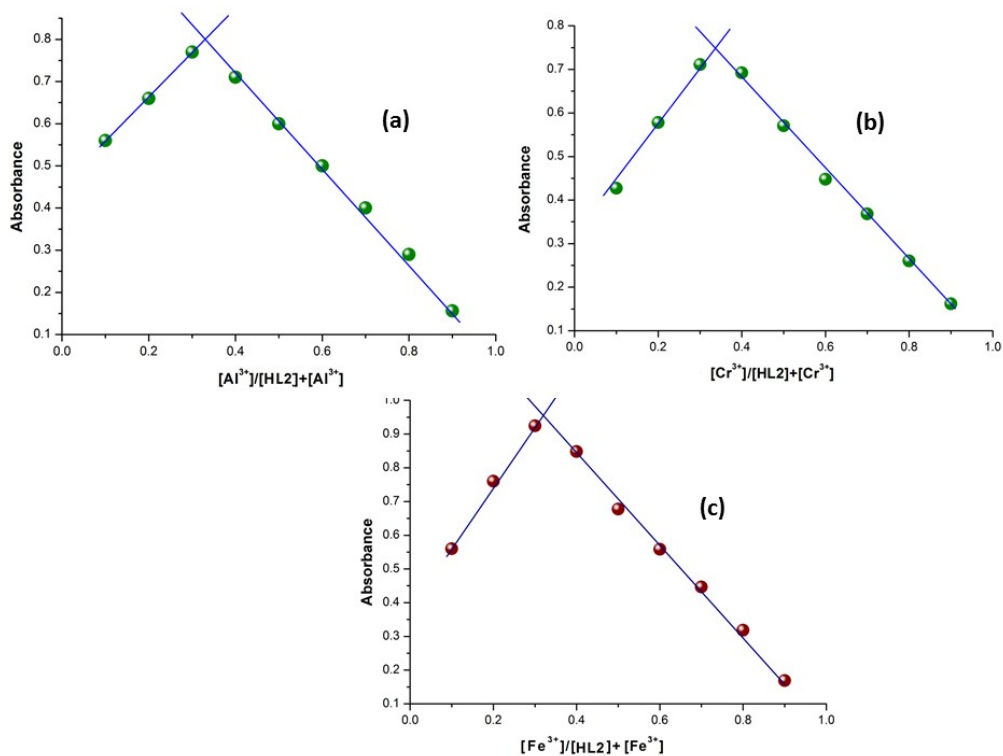

**Fig. S25** 2:1 (Ligand:Metal) binding stoichiometry has shown by Job's plot of complex 4-6(a-c) at  $\lambda = 525$  nm). Symbols and solid lines represent the experimental and simulated profiles, respectively.

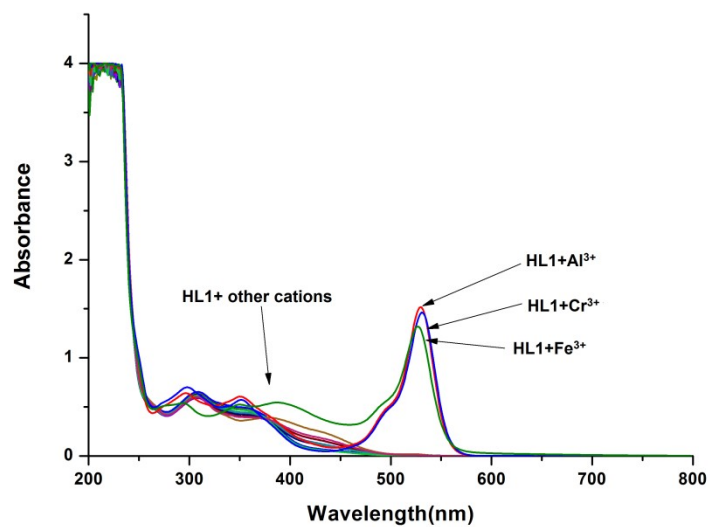

**Fig. S26** Absorption spectra of **HL1** in presence of different metal ions in 10 mM Britton Robinson buffer at pH 7.4.

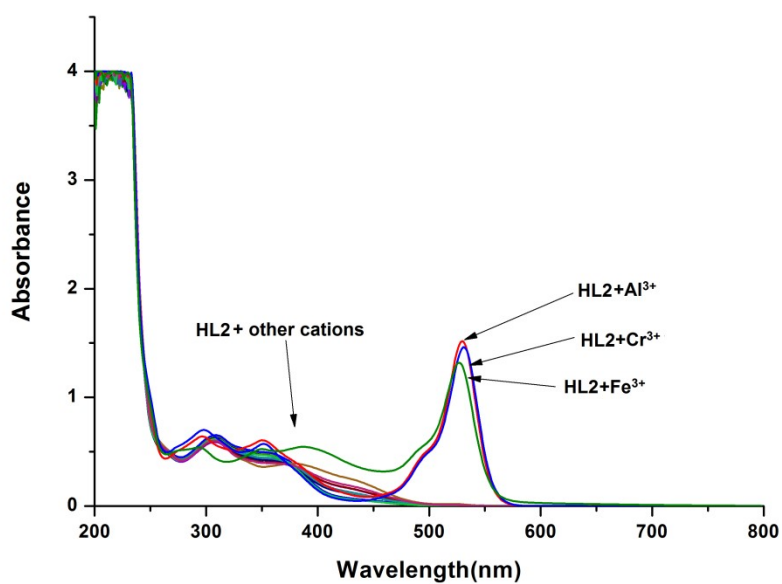

**Fig. S27**  
spectra of  
of  
ions in 10  
Robinson

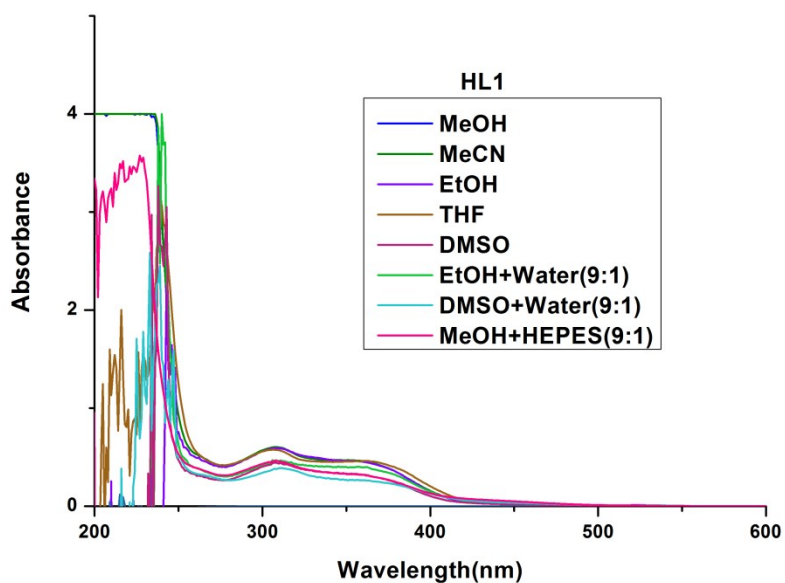

Absorption  
**HL2** in presence  
different metal  
mM Britton  
buffer at pH 7.4.

**Fig. S28(a)** Absorption spectra of **HL1** in presence of different solvent.

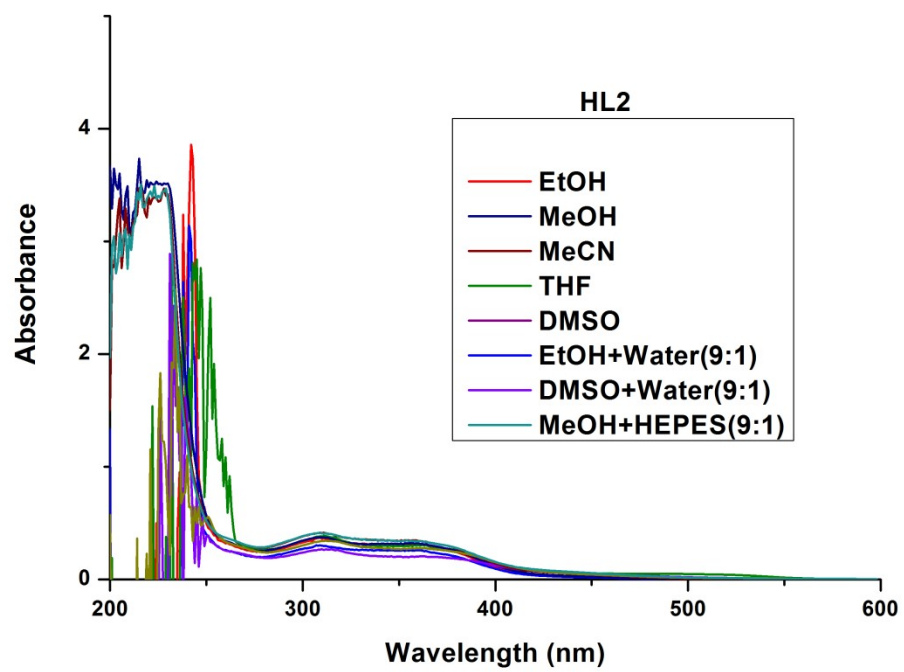

**Fig. S28(b)** Absorption spectra of **HL2** in presence of different solvent.

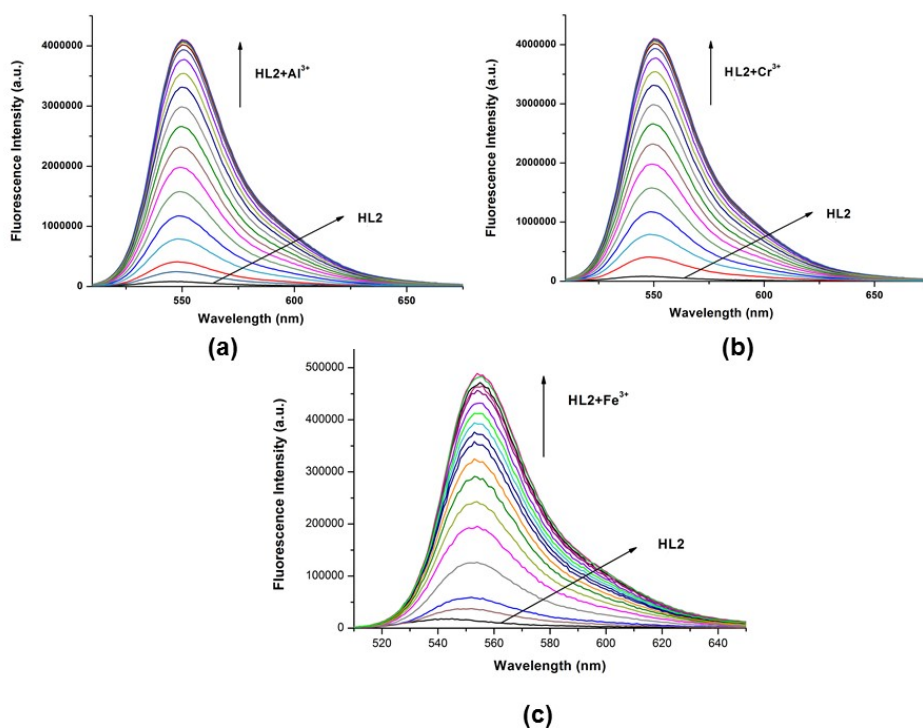

**Fig. S29** Fluorescence titration of **HL2** (10  $\mu\text{M}$ ) in 10 mM Britton Robinson buffer at pH = 7.4 by successive addition of metal ions ( $\text{Al}^{3+}$ ,  $\text{Cr}^{3+}$  and  $\text{Fe}^{3+}$ ) (0–6  $\mu\text{M}$ ) with  $\lambda_{\text{cm}} = 555 \text{ nm}$ .

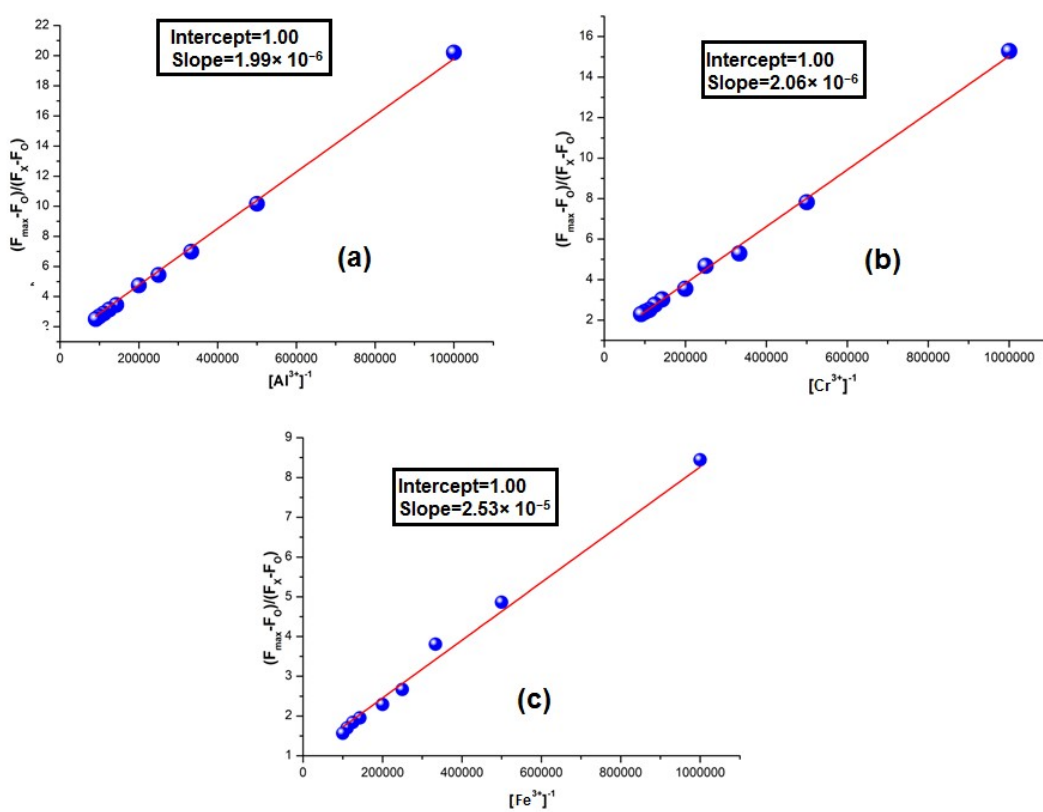

**Fig. S30** Benesi-Hildebrand plot for complex **4-6** (a-c). The plot is obtained after adding 5  $\mu\text{M}$   $\text{Al}^{3+}$ ,  $\text{Cr}^{3+}$  and  $\text{Fe}^{3+}$  solution to the **HL2** solution (10  $\mu\text{M}$ ) (in 10 mM HEPES buffer medium, pH 7.4).



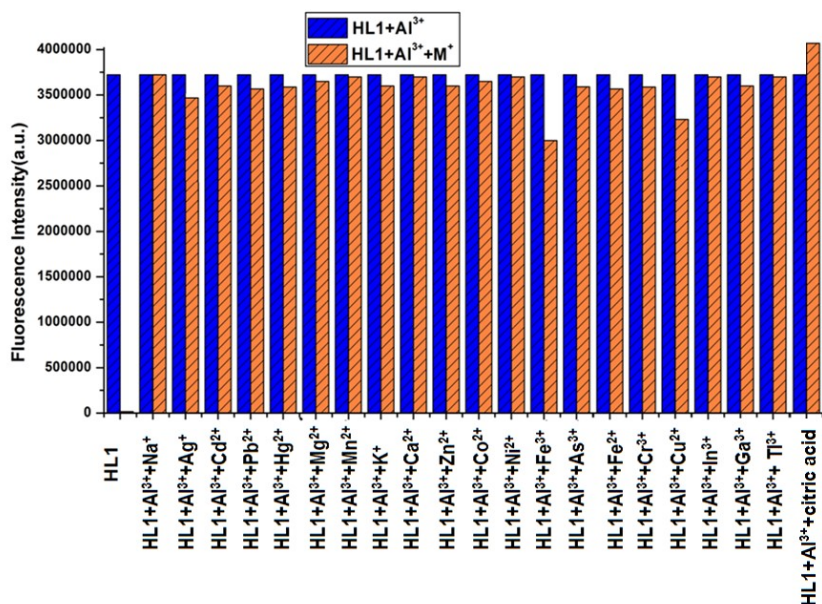

**Fig. S31** Relative fluorescence intensity diagram of [HL1-Cr<sup>3+</sup>] system in the presence of different cations in 10 mM Britton Robinson buffer at pH 7.4.

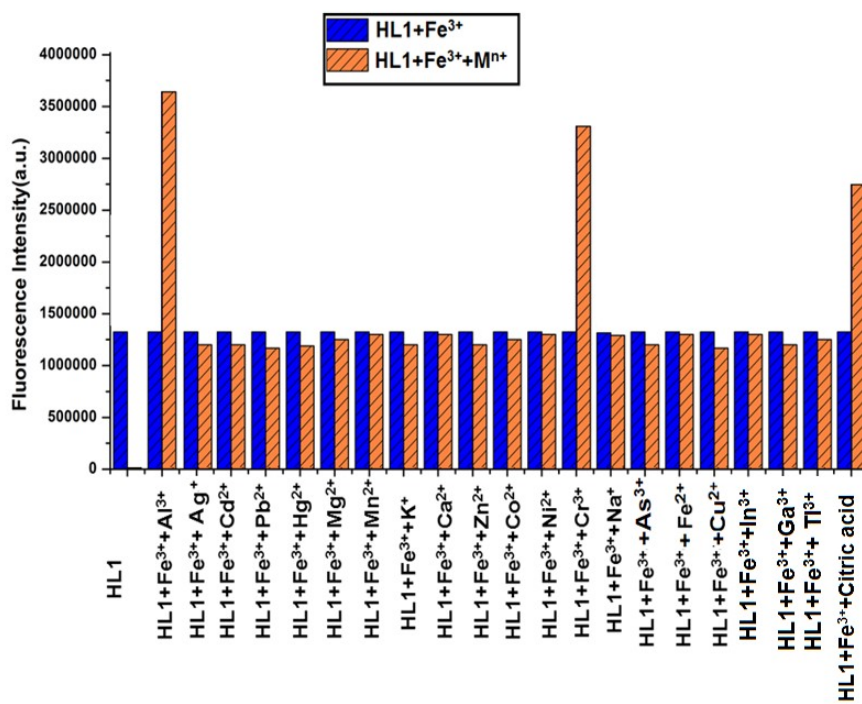

**Fig. S32** Relative fluorescence intensity diagram of [HL1-Fe<sup>3+</sup>] system in the presence of different cations in 10 mM Britton Robinson buffer at pH 7.4.



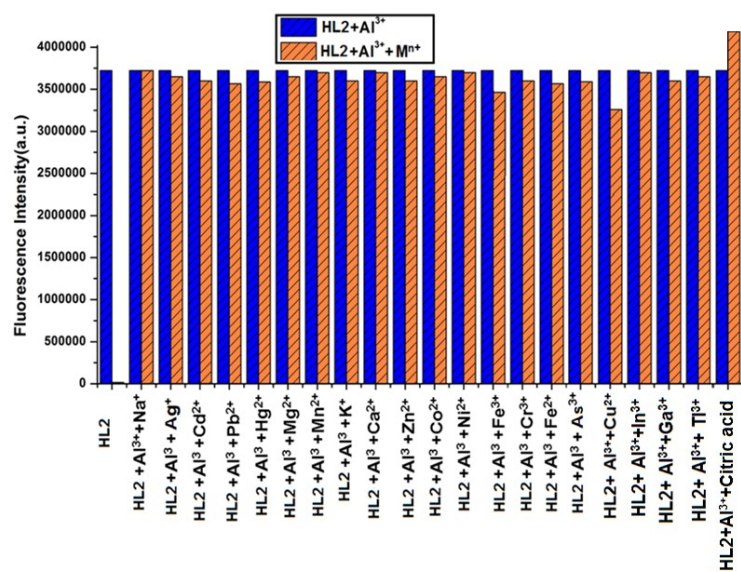

**Fig. S33** Relative fluorescence intensity diagram of [HL2-Al<sup>3+</sup>] system in the presence of different cations in 10 mM Britton Robinson buffer at pH 7.4

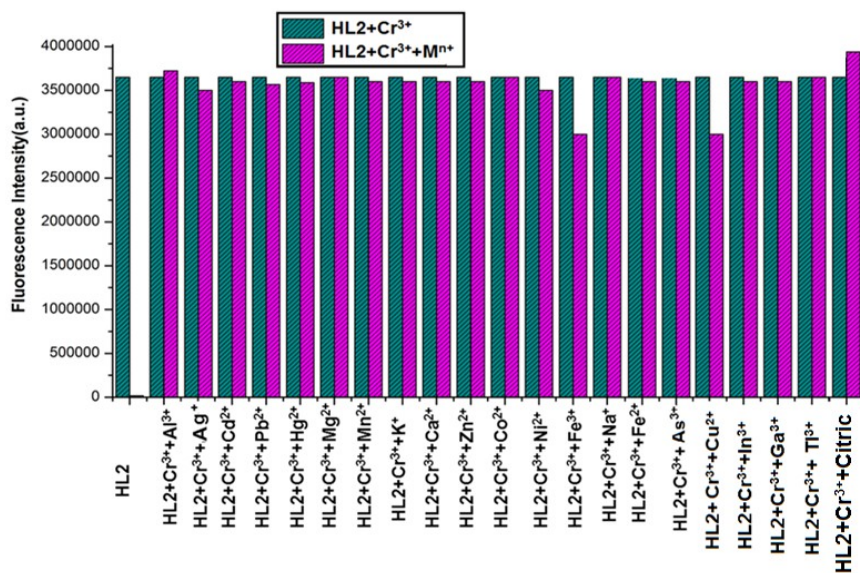

**Fig. S34** Relative fluorescence intensity diagram of [HL2-Cr<sup>3+</sup>] system in the presence of different cations in 10 mM Britton Robinson buffer at pH 7.4.

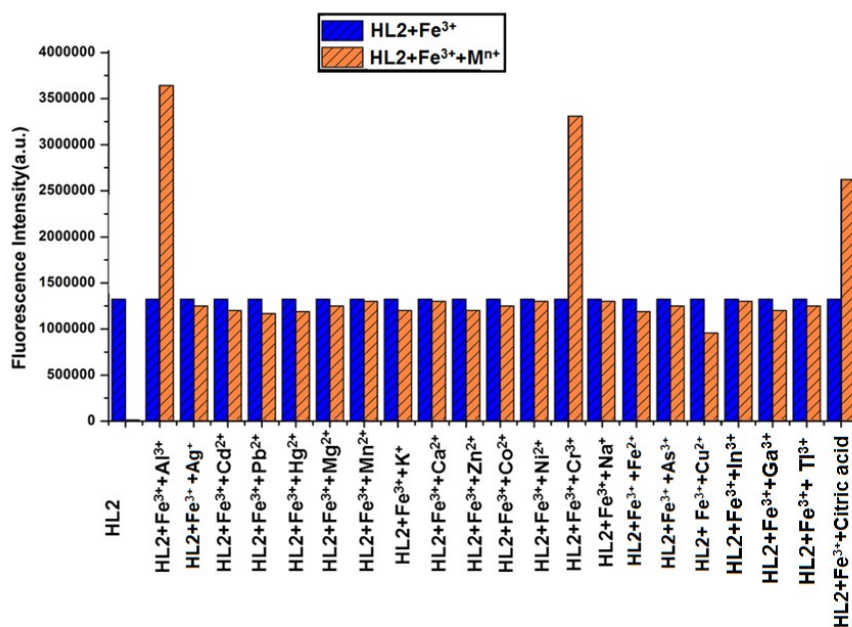

**Fig. S35** Relative fluorescence intensity diagram of [HL2-Fe<sup>3+</sup>] system in the presence of different cations in 10 mM Britton Robinson buffer at pH 7.4.

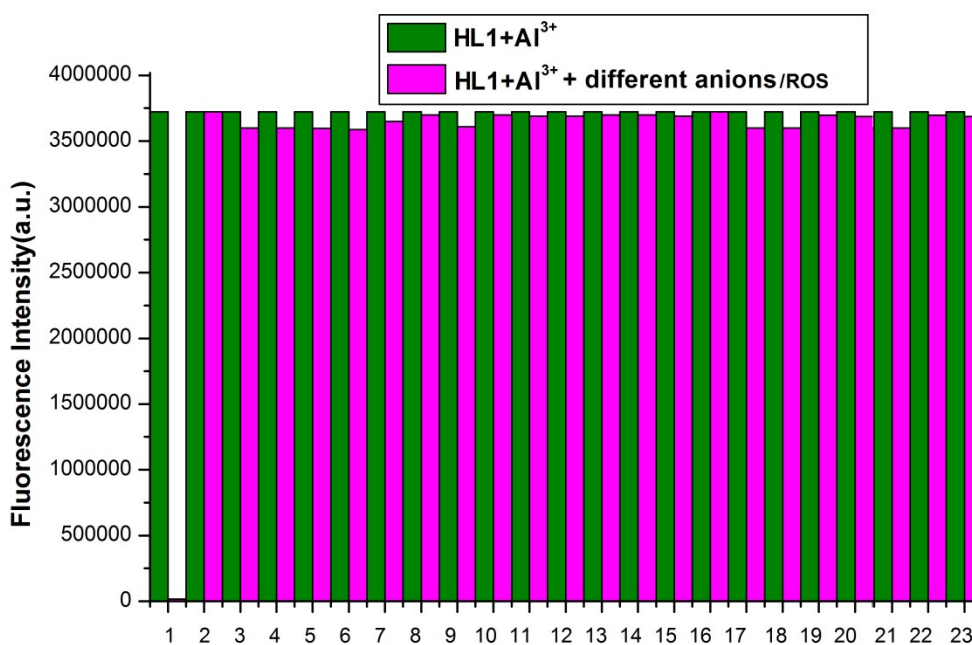

**Fig. S36** Relative fluorescence intensity diagram of [HL1-Al<sup>3+</sup>] system in the presence of different anions in Britton Robinson buffer medium (10 mM) at pH 7.4. 1=only HL1 (10 μM) and (2-20)= HL1 (10 μM) + Al<sup>3+</sup>(5 μM) + Anions (50 μM), Anions = 2-S<sub>2</sub>O<sub>3</sub><sup>2-</sup>, 3-S<sup>2-</sup>, 4-SO<sub>3</sub><sup>2-</sup>, 5-HSO<sub>4</sub><sup>-</sup>, 6-SO<sub>4</sub><sup>2-</sup>, 7-SCN<sup>-</sup>, 8-N<sub>3</sub><sup>-</sup>, 9-OCN<sup>-</sup>, 10-AsO<sub>4</sub><sup>3-</sup>, 11-H<sub>2</sub>PO<sub>4</sub><sup>-</sup>, 12-HPO<sub>4</sub><sup>2-</sup>, 13-PO<sub>4</sub><sup>3-</sup>, 14-ClO<sub>4</sub><sup>-</sup>, 15-AcO<sup>-</sup>, 16-NO<sub>3</sub><sup>-</sup>, 17-F<sup>-</sup>, 18-Cl<sup>-</sup>, 19-PF<sub>6</sub><sup>-</sup>, 20-P<sub>2</sub>O<sub>7</sub><sup>4-</sup>, 21NaOCl, 22KO<sub>2</sub>, 23H<sub>2</sub>O<sub>2</sub>.

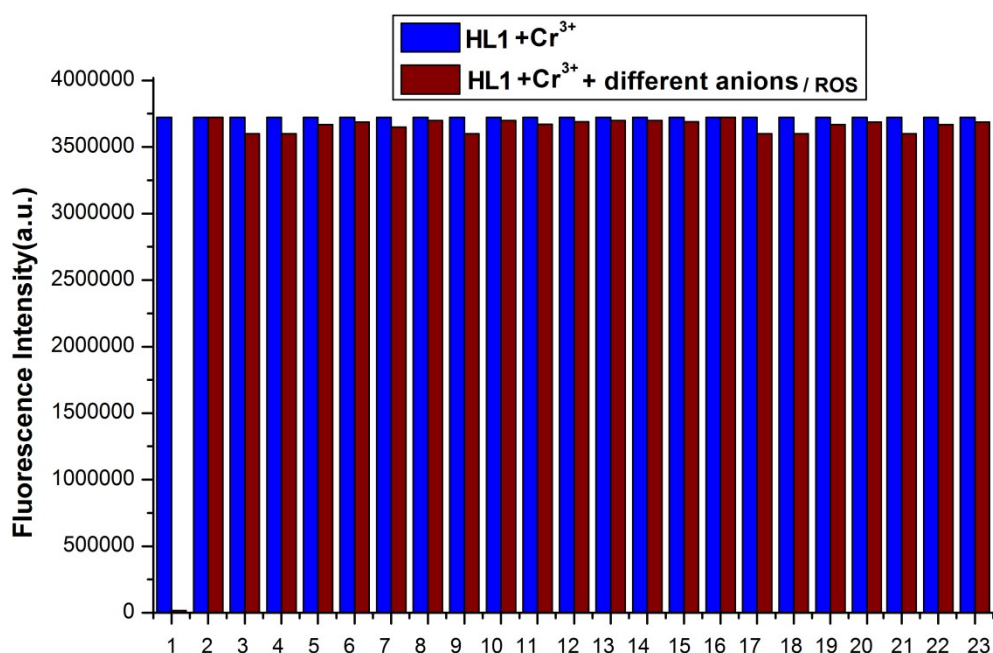

**Fig. S37** Relative fluorescence intensity diagram of [HL1-Cr<sup>3+</sup>] system in the presence of different anions in Britton Robinson buffer medium (10 mM) at pH 7.4. 1=only HL1 (10 μM) and (2-20)= HL1 (10 μM) + Cr<sup>3+</sup>(5 μM) + Anions (50 μM), Anions = 2-S<sub>2</sub>O<sub>3</sub><sup>2-</sup>, 3-S<sup>2-</sup>, 4-SO<sub>3</sub><sup>2-</sup>, 5-HSO<sub>4</sub><sup>-</sup>, 6-SO<sub>4</sub><sup>2-</sup>, 7-SCN<sup>-</sup>, 8-N<sub>3</sub><sup>-</sup>, 9-OCN<sup>-</sup>, 10-AsO<sub>4</sub><sup>3-</sup>, 11-H<sub>2</sub>PO<sub>4</sub><sup>-</sup>, 12-HPO<sub>4</sub><sup>2-</sup>, 13-PO<sub>4</sub><sup>3-</sup>, 14-ClO<sub>4</sub><sup>-</sup>, 15-AcO<sup>-</sup>, 16-NO<sub>3</sub><sup>-</sup>, 17-F<sup>-</sup>, 18-Cl<sup>-</sup>, 19-PF<sub>6</sub><sup>-</sup>, 20-P<sub>2</sub>O<sub>7</sub><sup>4-</sup>, 21NaOCl, 22KO<sub>2</sub>, 23H<sub>2</sub>O<sub>2</sub>.

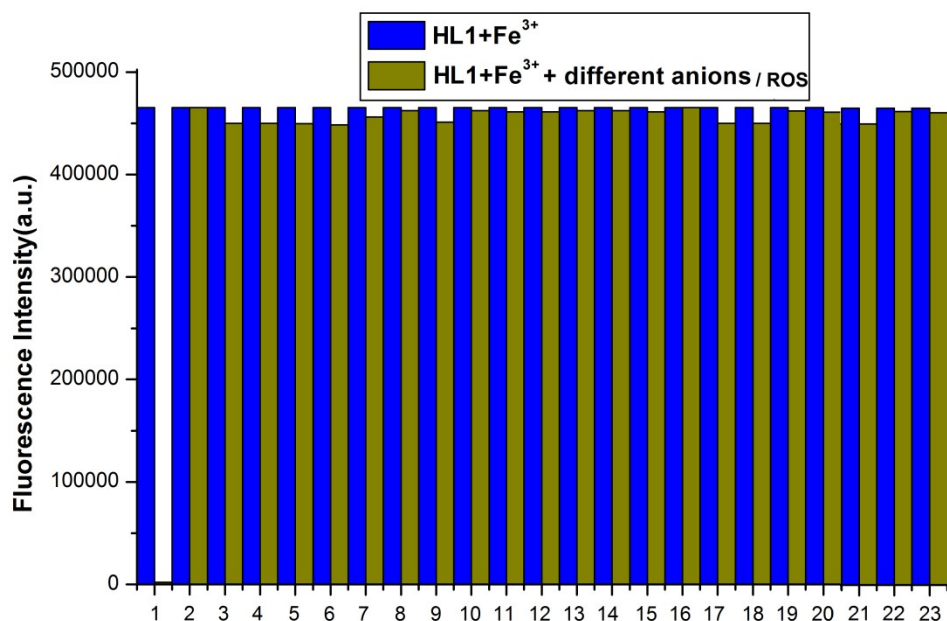

**Fig. S38** Relative fluorescence intensity diagram of [HL1-Fe<sup>3+</sup>] system in the presence of different anions in Britton Robinson buffer medium (10 mM) at pH 7.4. 1=only HL1 (10 μM) and (2-20)= HL1 (10 μM) + Fe<sup>3+</sup>(5 μM) + Anions (50 μM), Anions = 2-S<sub>2</sub>O<sub>3</sub><sup>2-</sup>, 3-S<sup>2-</sup>, 4-SO<sub>3</sub><sup>2-</sup>, 5-HSO<sub>4</sub><sup>-</sup>, 6-SO<sub>4</sub><sup>2-</sup>, 7-SCN<sup>-</sup>, 8-N<sub>3</sub><sup>-</sup>, 9-OCN<sup>-</sup>, 10-AsO<sub>4</sub><sup>3-</sup>, 11-H<sub>2</sub>PO<sub>4</sub><sup>-</sup>, 12-HPO<sub>4</sub><sup>2-</sup>, 13-PO<sub>4</sub><sup>3-</sup>, 14-ClO<sub>4</sub><sup>-</sup>, 15-AcO<sup>-</sup>, 16-NO<sub>3</sub><sup>-</sup>, 17-F<sup>-</sup>, 18-Cl<sup>-</sup>, 19-PF<sub>6</sub><sup>-</sup>, 20-P<sub>2</sub>O<sub>7</sub><sup>4-</sup>, 21NaOCl, 22KO<sub>2</sub>, 23H<sub>2</sub>O<sub>2</sub>.

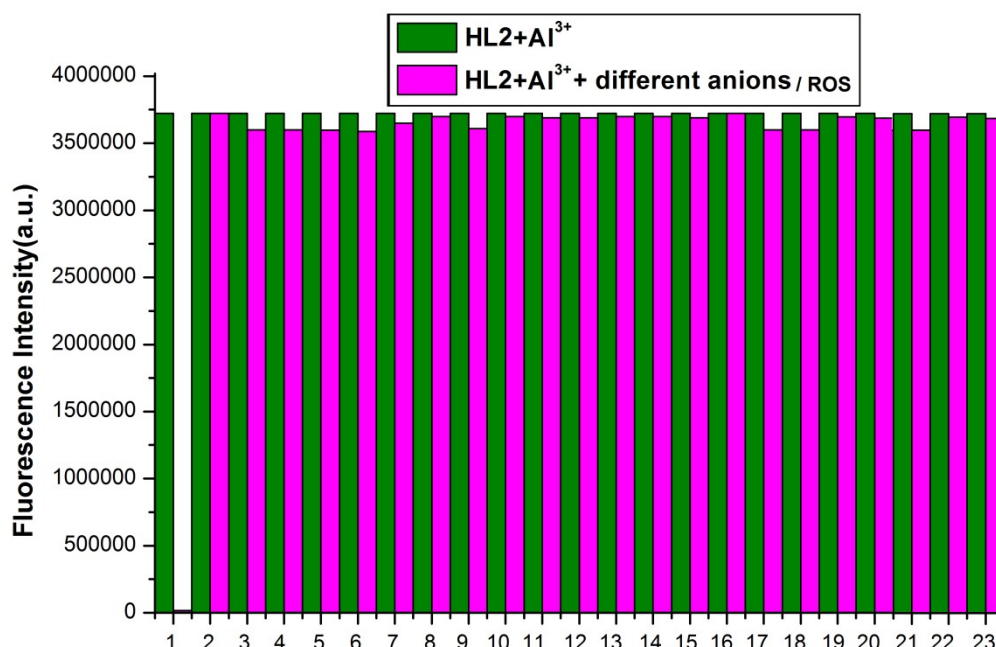

**Fig. S39** Relative fluorescence intensity diagram of [HL2-Al<sup>3+</sup>] system in the presence of different anions in Britton Robinson buffer medium (10 mM) at pH 7.4. 1=only HL2 (10 μM) and (2-20)= HL2 (10 μM) + Al<sup>3+</sup>(5 μM) + Anions (50 μM), Anions = 2-S<sub>2</sub>O<sub>3</sub><sup>2-</sup>, 3-S<sup>2-</sup>, 4-SO<sub>3</sub><sup>2-</sup>, 5-HSO<sub>4</sub><sup>-</sup>, 6-SO<sub>4</sub><sup>2-</sup>, 7-SCN<sup>-</sup>, 8-N<sub>3</sub><sup>-</sup>, 9-OCN<sup>-</sup>, 10-AsO<sub>4</sub><sup>3-</sup>, 11-H<sub>2</sub>PO<sub>4</sub><sup>-</sup>, 12-HPO<sub>4</sub><sup>2-</sup>, 13-PO<sub>4</sub><sup>3-</sup>, 14-ClO<sub>4</sub><sup>-</sup>, 15-AcO<sup>-</sup>, 16-NO<sub>3</sub><sup>-</sup>, 17-F<sup>-</sup>, 18-Cl<sup>-</sup>, 19-PF<sub>6</sub><sup>-</sup>, 20-P<sub>2</sub>O<sub>7</sub><sup>4-</sup>, 21NaOCl, 22KO<sub>2</sub>, 23H<sub>2</sub>O<sub>2</sub>.

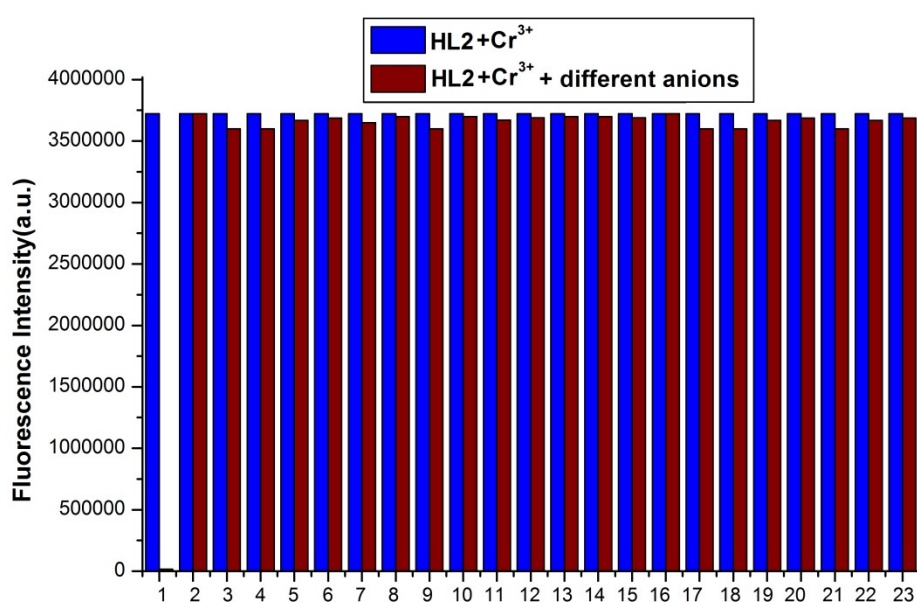

**Fig. S40** Relative fluorescence intensity diagram of [HL2-Cr<sup>3+</sup>] system in the presence of different anions in Britton Robinson buffer medium (10 mM) at pH 7.4. 1=only HL2 (10 μM) and (2-20)= HL2 (10 μM) + Fe<sup>3+</sup>(5 μM) + Anions (50 μM), Anions = 2-S<sub>2</sub>O<sub>3</sub><sup>2-</sup>, 3-S<sup>2-</sup>, 4-SO<sub>3</sub><sup>2-</sup>, 5-HSO<sub>4</sub><sup>-</sup>, 6-SO<sub>4</sub><sup>2-</sup>, 7-SCN<sup>-</sup>, 8-N<sub>3</sub><sup>-</sup>, 9-OCN<sup>-</sup>, 10-AsO<sub>4</sub><sup>3-</sup>, 11-H<sub>2</sub>PO<sub>4</sub><sup>-</sup>, 12-HPO<sub>4</sub><sup>2-</sup>, 13-PO<sub>4</sub><sup>3-</sup>, 14-ClO<sub>4</sub><sup>-</sup>, 15-AcO<sup>-</sup>, 16-NO<sub>3</sub><sup>-</sup>, 17-F<sup>-</sup>, 18-Cl<sup>-</sup>, 19-PF<sub>6</sub><sup>-</sup>, 20-P<sub>2</sub>O<sub>7</sub><sup>4-</sup>, 21NaOCl, 22KO<sub>2</sub>, 23H<sub>2</sub>O<sub>2</sub>.



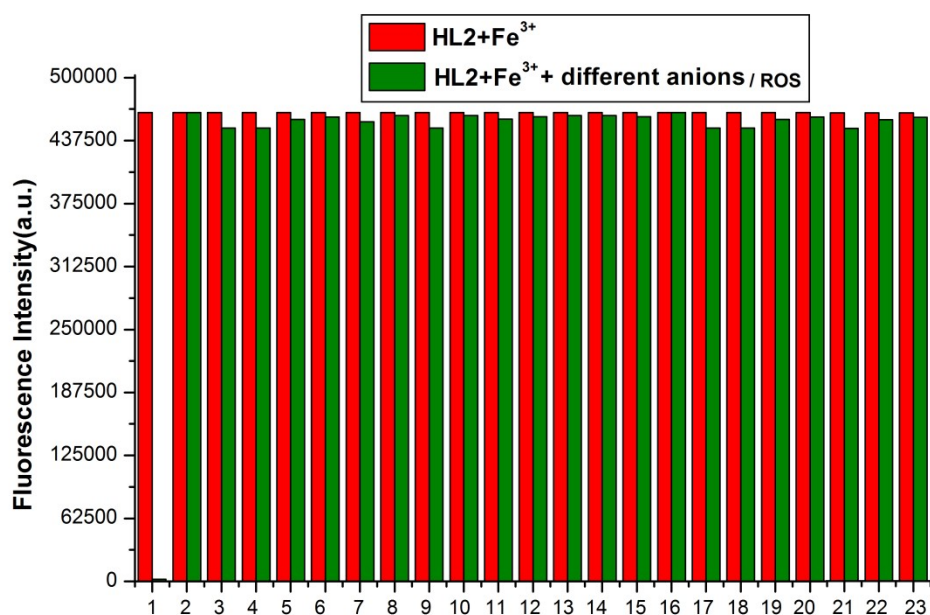

**Fig. S41** Relative fluorescence intensity diagram of [HL2-Fe<sup>3+</sup>] system in the presence of different anions in Britton Robinson buffer medium (10 mM) at pH 7.4. 1=only HL2 (10 μM) and (2-20)= HL2 (10 μM) + Fe<sup>3+</sup>(5 μM) + Anions (50 μM), Anions = 2-S<sub>2</sub>O<sub>3</sub><sup>2-</sup>, 3-S<sup>2-</sup>, 4-SO<sub>3</sub><sup>2-</sup>, 5-HSO<sub>4</sub><sup>-</sup>, 6-SO<sub>4</sub><sup>2-</sup>, 7-SCN<sup>-</sup>, 8-N<sub>3</sub><sup>-</sup>, 9-OCN<sup>-</sup>, 10-AsO<sub>4</sub><sup>3-</sup>, 11-H<sub>2</sub>PO<sub>4</sub><sup>-</sup>, 12-HPO<sub>4</sub><sup>2-</sup>, 13-PO<sub>4</sub><sup>3-</sup>, 14-ClO<sub>4</sub><sup>-</sup>, 15-AcO<sup>-</sup>, 16-NO<sub>3</sub><sup>-</sup>, 17-F<sup>-</sup>, 18-Cl<sup>-</sup>, 19-PF<sub>6</sub><sup>-</sup>, 20-P<sub>2</sub>O<sub>7</sub><sup>4-</sup>, 21NaOCl, 22-KO<sub>2</sub>, 23H<sub>2</sub>O<sub>2</sub>.

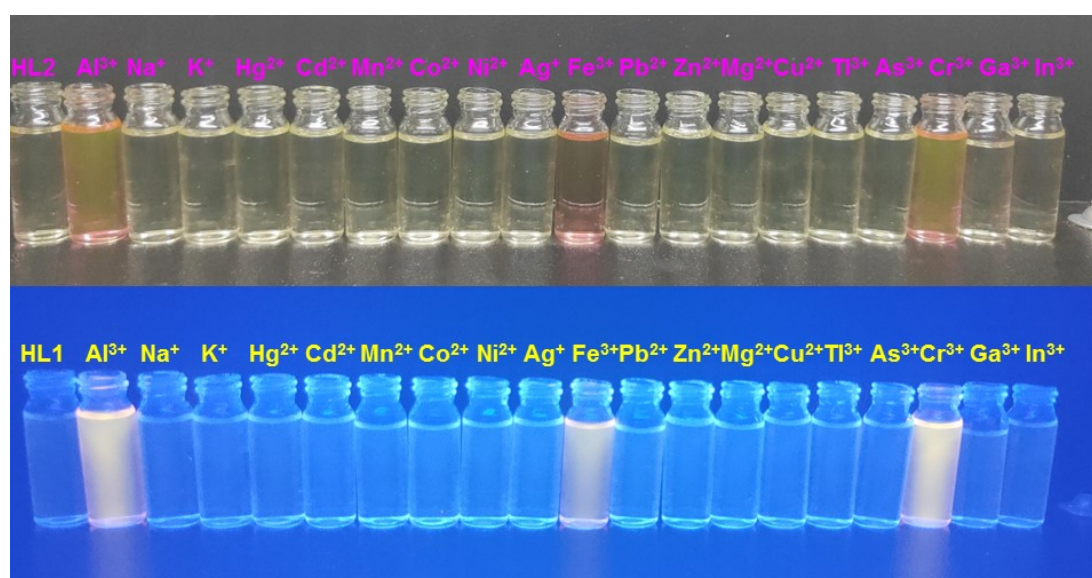

**Fig. S42** Visual colour changes of chemosensor HL2 (10μM) in presence of common metal ions (0.5 equivalent) in 10 mM Britton Robinson buffer (pH 7.4). The images in above row and below row were taken under visible light and UV light respectively.

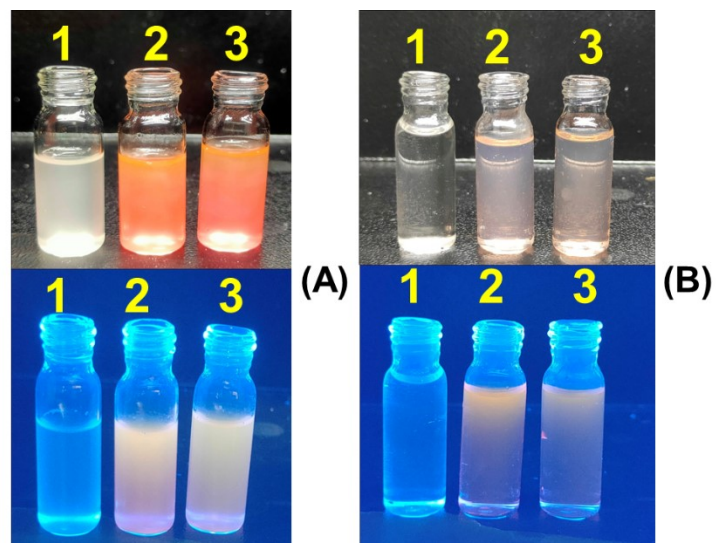

**Fig. S43** Visual colour changes of real samples under normal light (above) and UV light (below) in presence of chemosensors (**HL1** and **HL2**). (A) Saloon waste water, (1= Only saloon waste water, 2 and 3= Saloon waste water + **HL1/HL2**). (B) Laboratory tap water (1= Only laboratory tap water, 2 and 3=laboratory tap water + **HL1/HL2**).

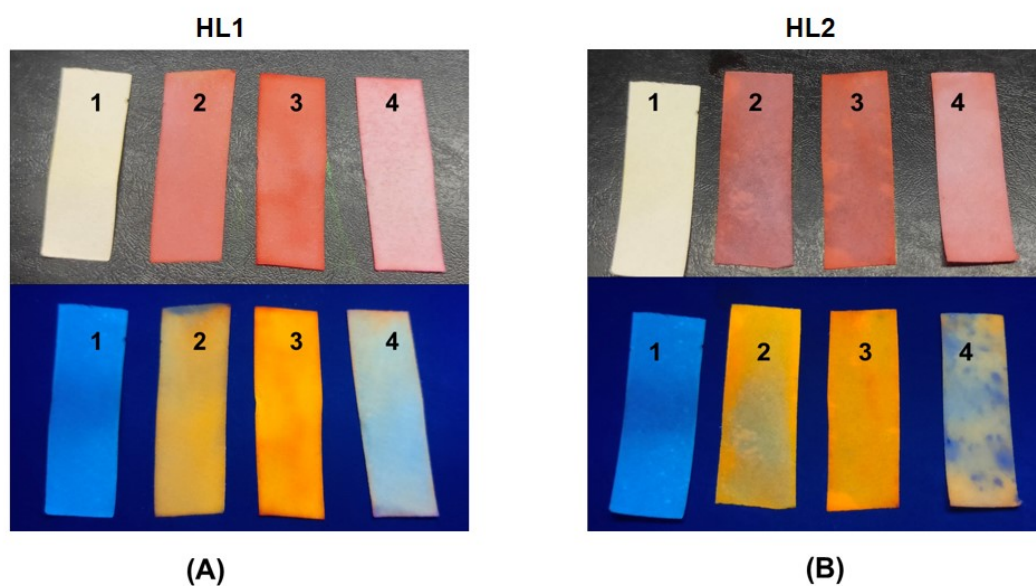

**Fig. S44** Colour changes of paper strip under normal light (above) and UV light (below) in presence of chemosensors **HL1** (A) and **HL2** (B) [1=only **HL1/ HL2**; 2-4= **HL1/ HL2** +  $\text{Cr}^{3+}$ ,  $\text{Al}^{3+}$  and  $\text{Fe}^{3+}$ , respectively].

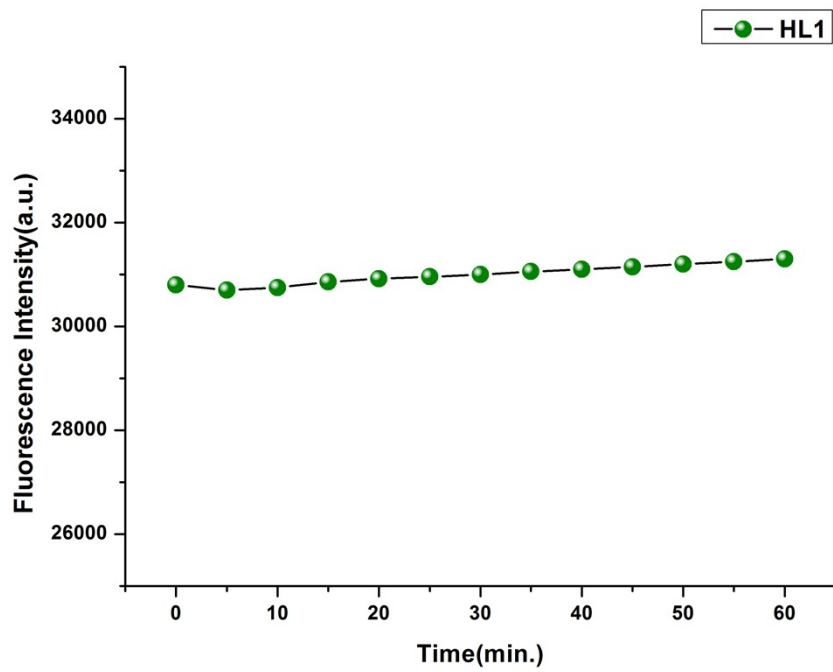

**Fig. S45** The photostability of **HL1** (10  $\mu$ M) in 10 mM Britton Robinson buffer at pH 7.4. ( $\lambda_{ex}$  = 450 nm. Slit 1/1).

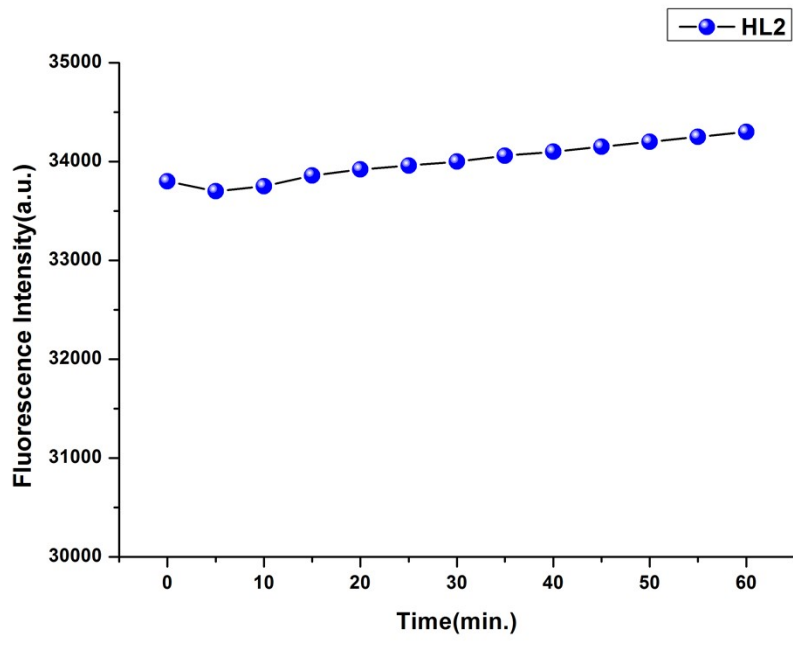

**Fig. S46** The photostability of **HL2** (10  $\mu$ M) in 10 mM Britton Robinson buffer at pH 7.4. ( $\lambda_{ex}$  = 450 nm. Slit 1/1).



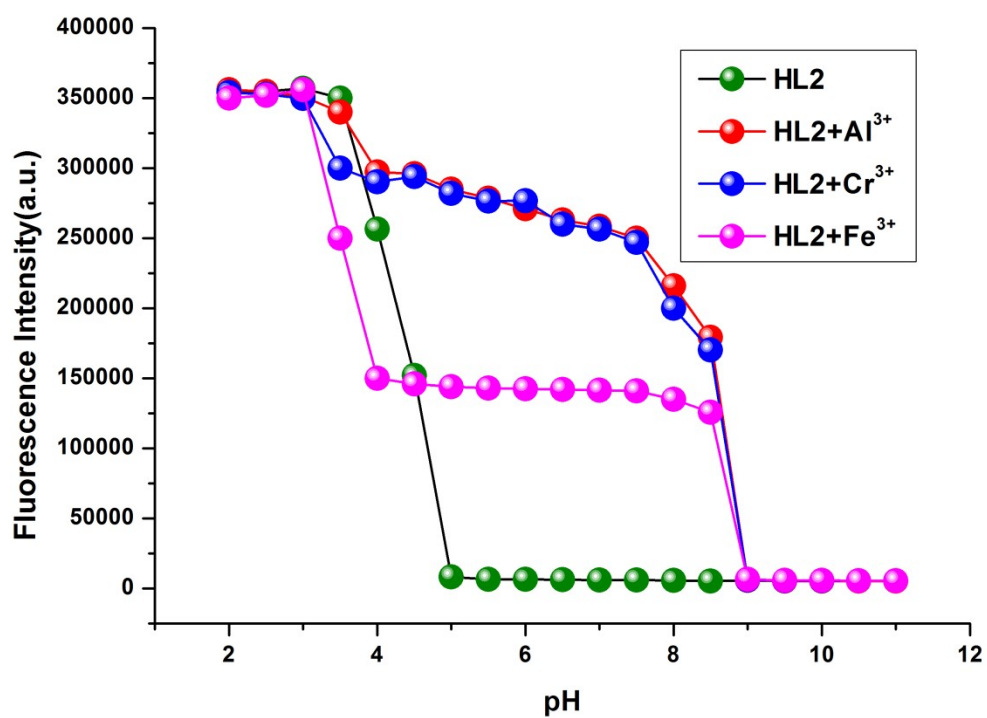

**Fig. S47** Fluorescence intensity of **HL2** (10  $\mu\text{M}$ ) in the absence and presence of metal ions ( $\text{Al}^{3+}$ ,  $\text{Cr}^{3+}$  and  $\text{Fe}^{3+}$ ) (5  $\mu\text{M}$ ) at different pH values in 10 mM Britton Robinson buffer.

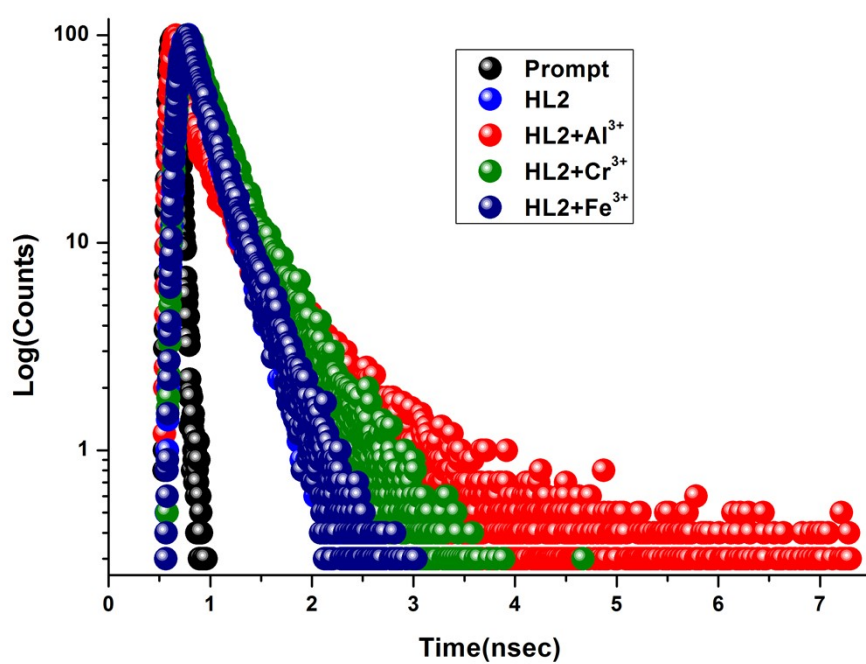

**Fig. S48** Time-resolved fluorescence decay curves (logarithm of normalized intensity vs time in ns) of **HL2**.

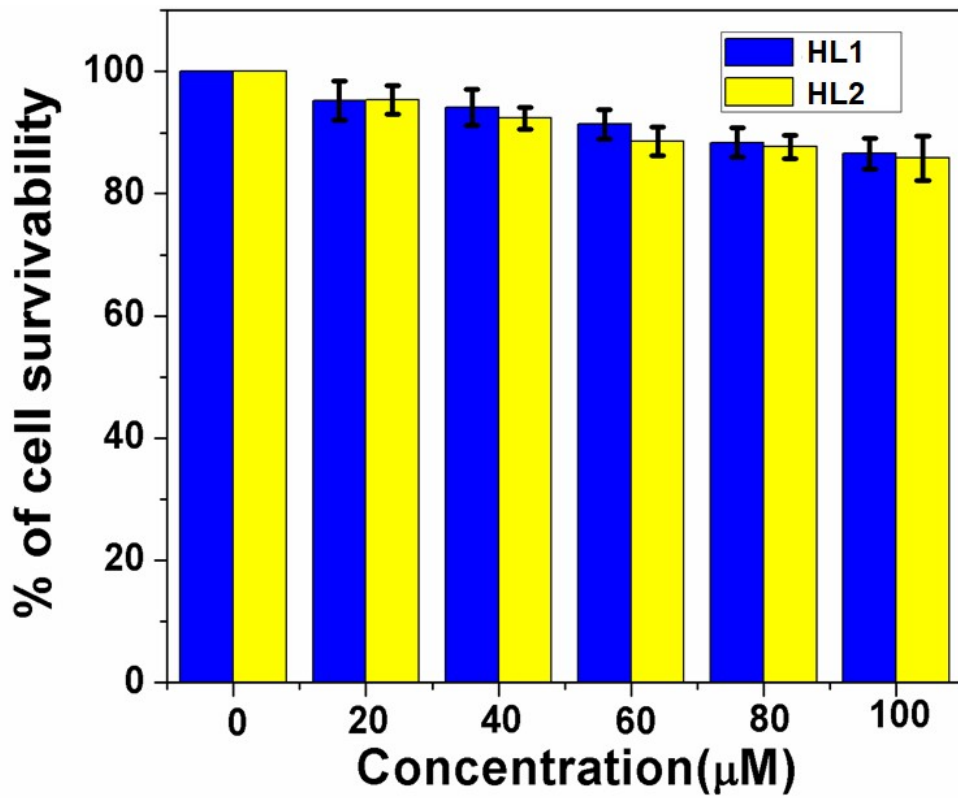

Fig. S49 Survivability of WI38 cells exposed to HL1 and HL2.

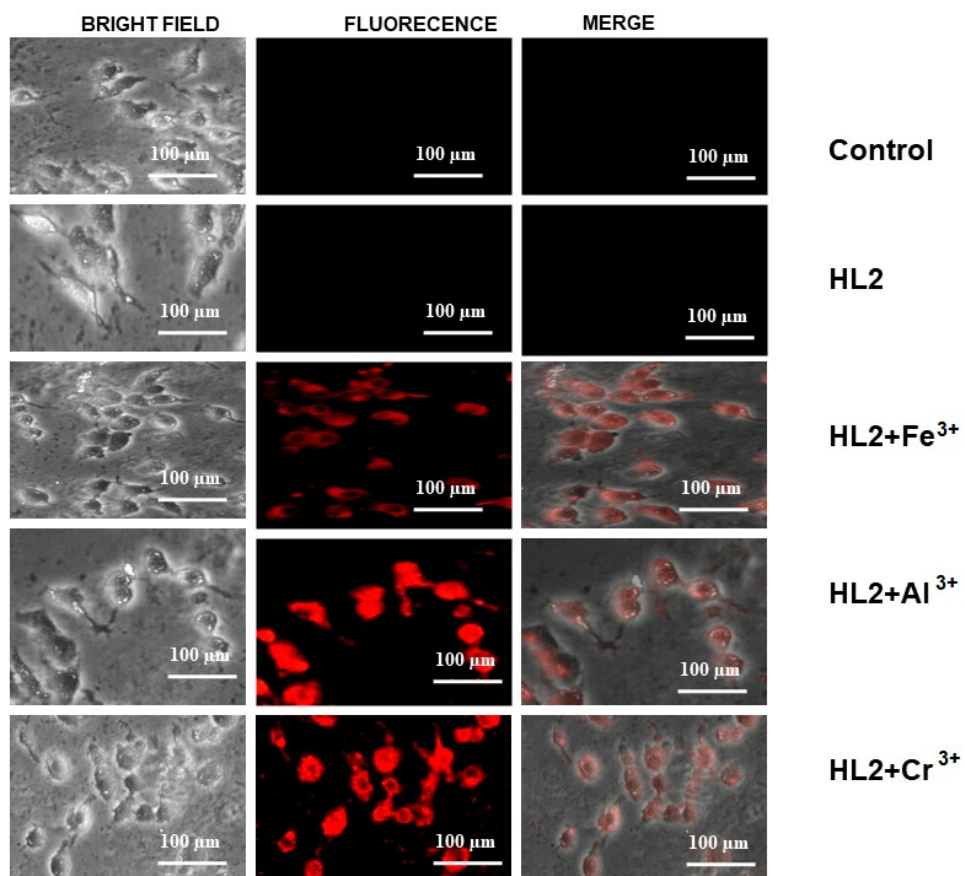

Fig. S50 Bright field, fluorescence and merged microscopic images of untreated HeLa (Control), cells in presence of chemosensor (HL2) (10μM) + M<sup>3+</sup> (Al<sup>3+</sup>, Cr<sup>3+</sup> and Fe<sup>3+</sup>) (5μM).

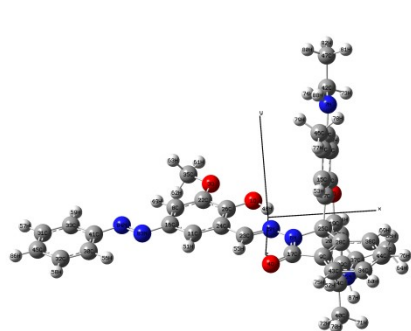

(Enol)

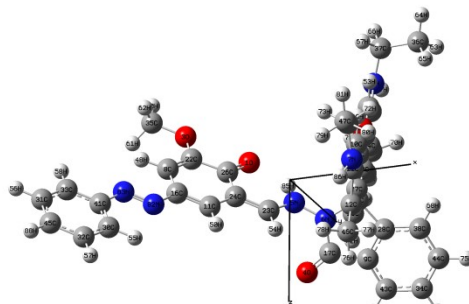

(Keto)

Fig. S51(a) DFT optimized structure of HL1 (Enol and Keto form)

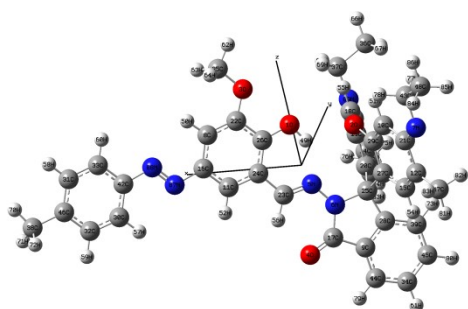

(Enol)

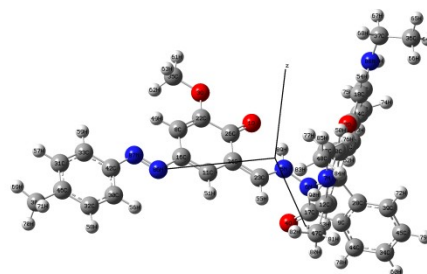

(Keto)

Fig. S51(b) DFT optimized structure of HL2 (Enol and Keto form)

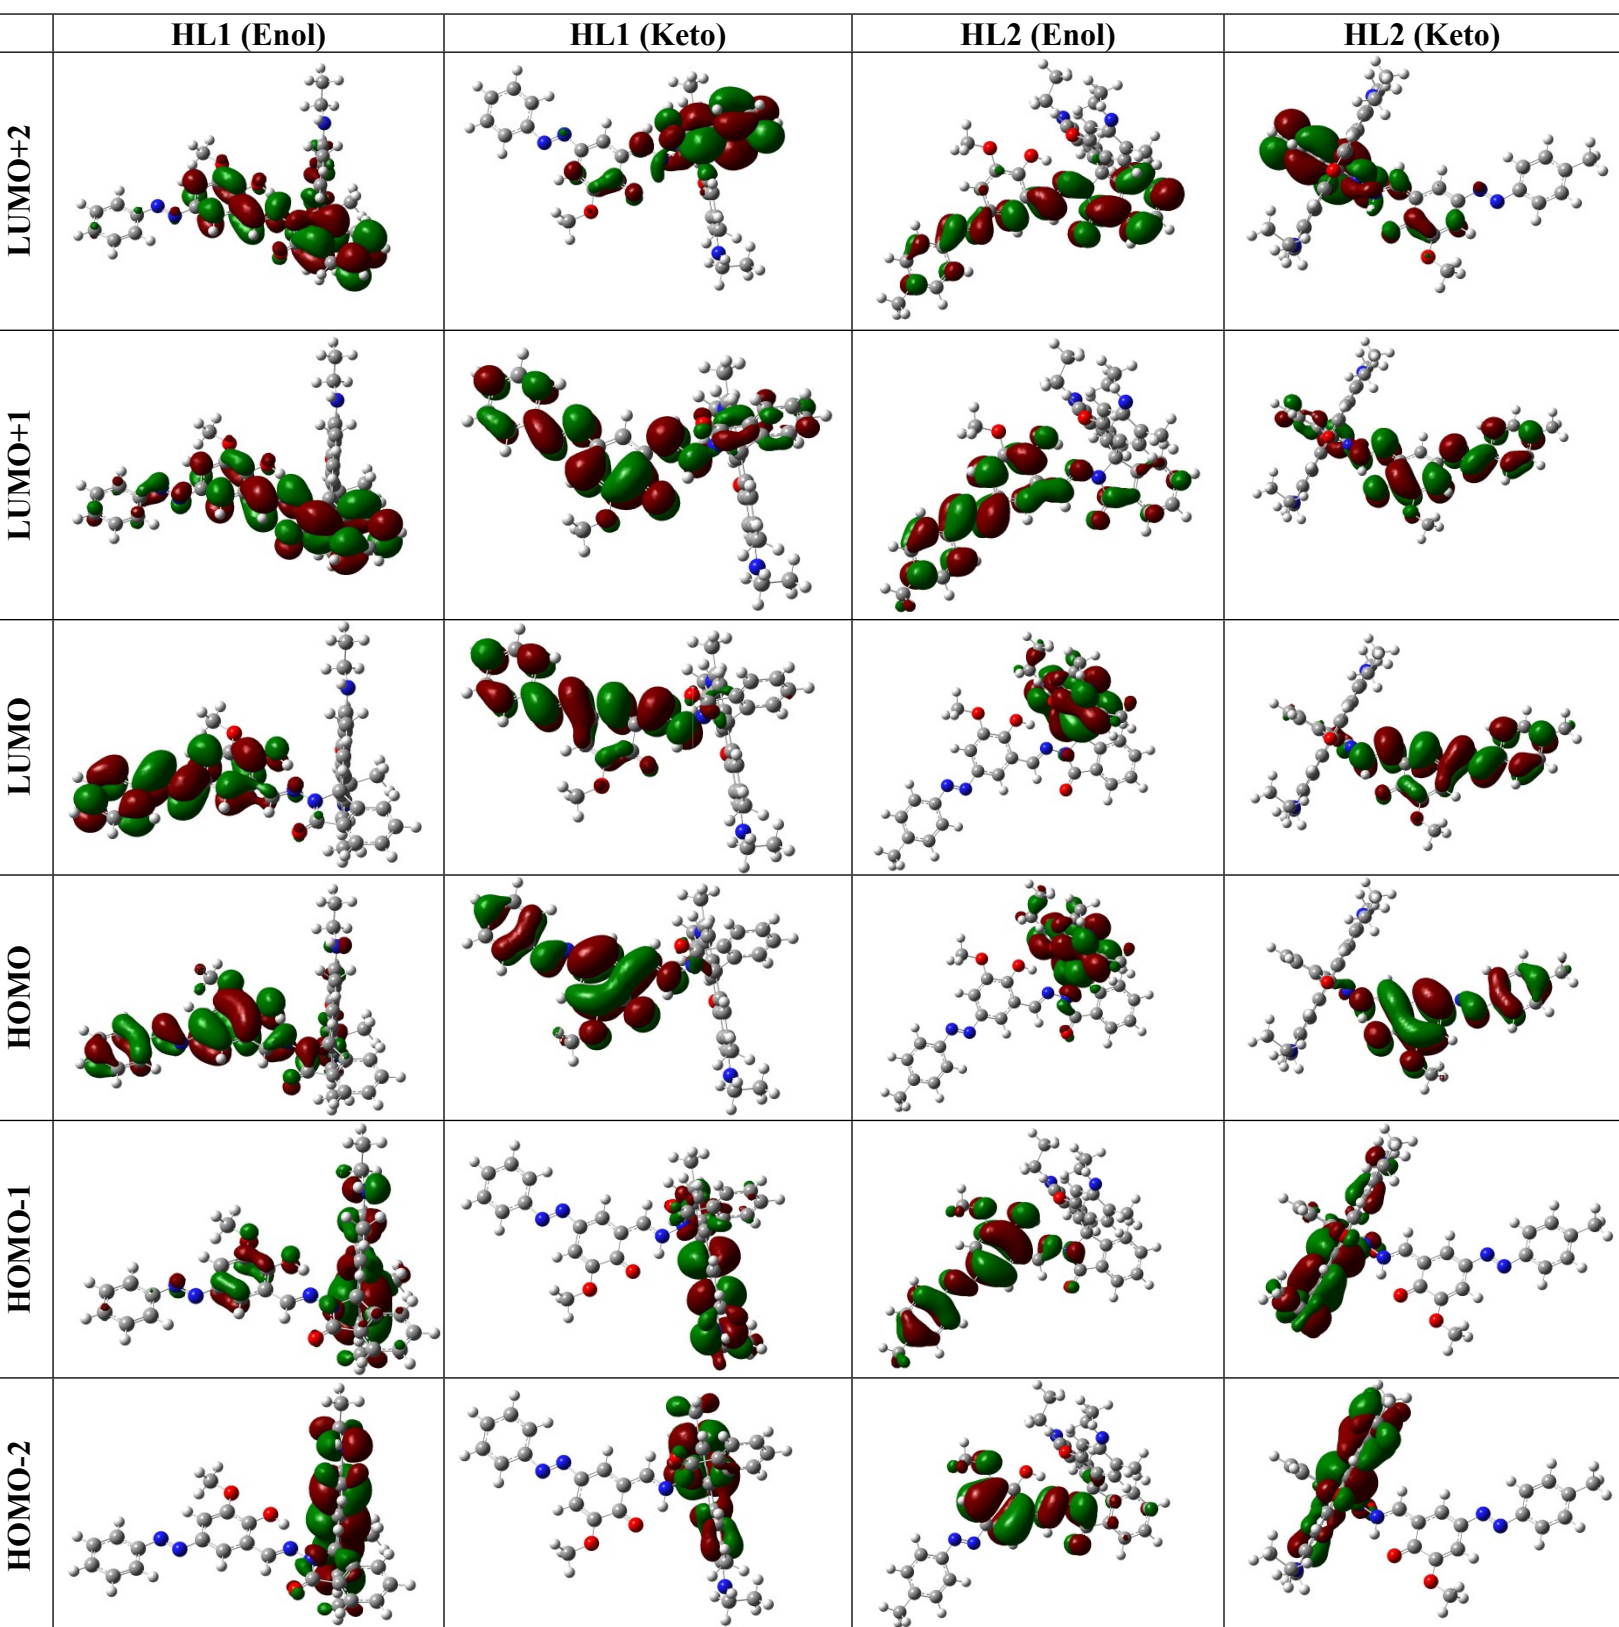

Fig. S52(b) Selected contour plots of molecular orbitals of HL1 and HL2.

|        | Al-bound |
|--------|----------|
| LUMO+2 |          |
| LUMO+1 |          |
| LUMO   |          |
| HOMO   |          |



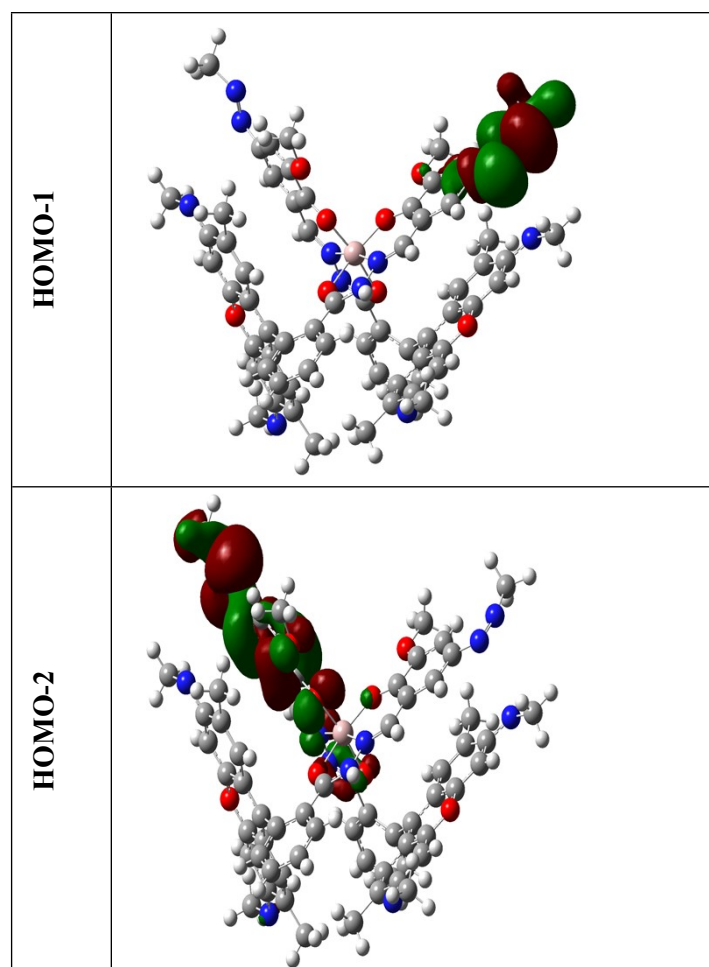

Fig. S52 (b) Selected contour plots of molecular orbitals of **Al-bound** chemosensor.

**Table S1.** Lifetime, quantum yield, LOD and binding constant values of chemosensors (**HL1** and **HL2**) and complexes (**1-6**).

|                  | Lifetime (ns) ( $\tau_{av.}$ ) | Quantum Yield ( $\Phi$ ) | LOD (M)                 | Binding Constant ( $M^{-1}$ ) |
|------------------|--------------------------------|--------------------------|-------------------------|-------------------------------|
| <b>HL1</b>       | 2.26                           | 0.005                    | -                       | -                             |
| <b>HL2</b>       | 2.21                           | 0.006                    | -                       | -                             |
| complex <b>1</b> | 4.56                           | 0.26                     | $2.86 \times 10^{-8} M$ | $5.14 \times 10^5$            |
| complex <b>2</b> | 3.77                           | 0.24                     | $2.67 \times 10^{-8} M$ | $4.91 \times 10^5$            |
| complex <b>3</b> | 2.14                           | 0.027                    | $5.62 \times 10^{-6} M$ | $3.37 \times 10^4$            |
| complex <b>4</b> | 4.24                           | 0.25                     | $2.78 \times 10^{-8} M$ | $5.03 \times 10^5$            |
| complex <b>5</b> | 3.59                           | 0.23                     | $2.61 \times 10^{-8} M$ | $4.86 \times 10^5$            |
| complex <b>6</b> | 2.12                           | 0.022                    | $6.14 \times 10^{-6} M$ | $3.95 \times 10^4$            |

**Table S2.** Crystal parameters and selected refinement details for **HL1**, **HL2**, complex **1** and complex **4**.

| sample                                                 | <b>HL 1</b>               | <b>HL2</b>                | complex <b>1</b>             | complex <b>4</b>                 |
|--------------------------------------------------------|---------------------------|---------------------------|------------------------------|----------------------------------|
| CCDC                                                   | 2051844                   | 2051845                   | 2051846                      | 2051847                          |
| Empirical formula                                      | $C_{42}H_{38}Cl_6N_6O_4$  | $C_{42}H_{38}Cl_3N_6O_4$  | $C_{89}H_{97}AlN_{17}O_{15}$ | $C_{164}H_{150}Al_2N_{28}O_{36}$ |
| Formula weight                                         | 903.48                    | 797.13                    | 1671.81                      | 3143.07                          |
| Temperature (K)                                        | 273(2)                    | 273(2)                    | 273(2)                       | 293(2)                           |
| Crystal system                                         | monoclinic                | triclinic                 | Monoclinic                   | triclinic                        |
| Space group                                            | <i>P21/c</i>              | <i>P-1</i>                | <i>P21/c</i>                 | <i>P-1</i>                       |
| <i>a</i> (Å)                                           | 23.1315(19)               | 9.2184(7)                 | 13.9132(12)                  | 16.651(16)                       |
| <i>b</i> (Å)                                           | 11.7069(10)               | 13.4158(10)               | 16.3851(14)                  | 20.317(19)                       |
| <i>c</i> (Å)                                           | 17.5826(15)               | 17.3821(13)               | 19.9383(17)                  | 28.03(3)                         |
| $\alpha$ (°)                                           | 90                        | 84.617(3)                 | 92.089(3)                    | 106.557(14)                      |
| $\beta$ (°)                                            | 110.173(3)                | 78.146(3)                 | 106.005(3)                   | 94.278(18)                       |
| $\gamma$ (°)                                           | 90                        | 76.103(3)                 | 90.341(3)                    | 114.051(14)                      |
| Volume (Å <sup>3</sup> )                               | 4469.3(7)                 | 2040.0(3)                 | 4365.6(7)                    | 8101(13)                         |
| <i>Z</i>                                               | 4                         | 2                         | 2                            | 2                                |
| $D_{calc}$ (g cm <sup>-3</sup> )                       | 1.343                     | 1.298                     | 1.272                        | 1.288                            |
| Absorption coefficient (mm <sup>-1</sup> )             | 0.432                     | 0.273                     | 0.098                        | 0.103                            |
| <i>F</i> (000)                                         | 1864                      | 830                       | 1766                         | 3288                             |
| $\theta$ Range for data collection (°)                 | 1.97-27.11                | 1.92- 27.15               | 1.66-27.19                   | 1.61-27.12                       |
| Reflections collected                                  | 9827                      | 9010                      | 19326                        | 35653                            |
| Independent reflection / $R_{int}$                     | 4996/0.1022               | 5171/0.0898               | 12734/0.0695                 | 14083/0.1302                     |
| Data / restraints / parameters                         | 9827/0/581                | 9010/0/500                | 19326/0/1072                 | 35653/0/2132                     |
| Goodness-of-fit on $F^2$                               | 1.026                     | 1.022                     | 1.036                        | 1.024                            |
| Final indices [ $I > 2\sigma(I)$ ]                     | R1= 0.0936<br>wR1= 0.2212 | R1= 0.1062<br>wR1= 0.0761 | R1=0.0812<br>wR1= 0.2388     | R1=0.0941<br>wR1= 0.2572         |
| <i>R</i> indices (all data)                            | R1= 0.1700<br>wR2= 0.2707 | R1= 0.1062<br>wR2= 0.3072 | R1= 0.1190<br>wR2= 0.2844    | R1= 0.2280<br>wR2= 0.3493        |
| Largest diff. peak / deepest hole (e Å <sup>-3</sup> ) | 0.297/-0.369              | 0.957/-0.663              | 0.858/-0.828                 | 1.163/-0.328                     |



**Table S3.** Selected Bond lengths (Å) and Bond angles (°) for **HL1**, **HL2**, complex **1** and complex **4**.

| HL1                |          | HL2                |          | complex 1        |            | complex 4         |            |
|--------------------|----------|--------------------|----------|------------------|------------|-------------------|------------|
| <b>N4-C9</b>       | 1.282(4) | <b>C27-N6</b>      | 1.221(4) | <b>Al1-O1</b>    | 1.889(2)   | <b>Al1-O2</b>     | 1.863(4)   |
| <b>N4-N3</b>       | 1.370(4) | <b>N6-N5</b>       | 1.361(5) | <b>Al1-O2</b>    | 1.893(2)   | <b>Al1-O3</b>     | 1.811(4)   |
| <b>O2-C19</b>      | 1.229(4) | <b>C26-N5</b>      | 1.367(2) | <b>Al1-O6</b>    | 1.850(2)   | <b>Al1-O6</b>     | 1.929(4)   |
| <b>O3-C31</b>      | 1.356(4) | <b>C10-N5</b>      | 1.489(3) | <b>Al1-O7</b>    | 1.840(2)   | <b>Al1-O7</b>     | 1.807(4)   |
| <b>O5-C40</b>      | 1.371(4) | <b>C26-O4</b>      | 1.230(4) | <b>Al1-N3</b>    | 1.985(2)   | <b>Al1-N3</b>     | 1.957(4)   |
| <b>O5-C32</b>      | 1.375(4) | <b>C29-O1</b>      | 1.335(4) | <b>Al1-N9</b>    | 1.992(2)   | <b>Al1-N10</b>    | 2.000(4)   |
| <b>N3-C19</b>      | 1.374(4) | <b>C10-C11</b>     | 1.511(5) | <b>O2-C11</b>    | 1.291(3)   | <b>O6-C67</b>     | 1.251(5)   |
| <b>N3-C8</b>       | 1.510(4) | <b>C10-C6</b>      | 1.512(4) | <b>O1-C10</b>    | 1.290(3)   | <b>O2-C26</b>     | 1.294(5)   |
| <b>N5-N6</b>       | 1.241(4) | <b>C27-N6</b>      | 1.282(6) | <b>N2-C11</b>    | 1.307(3)   | <b>N9-C67</b>     | 1.334(6)   |
| <b>N5-C12</b>      | 1.446(5) | <b>C14-N1</b>      | 1.382(3) | <b>N10-C10</b>   | 1.312(3)   | <b>N3-C26</b>     | 1.322(5)   |
| <b>O7-C29</b>      | 1.375(5) | <b>C3-N4</b>       | 1.361(4) | <b>N6-N7</b>     | 1.265(4)   | <b>N11-N12</b>    | 1.265(6)   |
| <b>O7-C30</b>      | 1.436(6) | <b>N4-C3</b>       | 1.371(5) | <b>N2-N3</b>     | 1.401(3)   | <b>N5-N6</b>      | 1.277(6)   |
| <b>N1-C4</b>       | 1.392(5) | <b>N4-C2</b>       | 1.454(6) | <b>O7-Al1-O1</b> | 168.75(9)  | <b>O2-Al-O3</b>   | 170.38(15) |
| <b>N6-C14</b>      | 1.434(5) | <b>N2-N3</b>       | 1.261(5) | <b>O6-Al1-O2</b> | 169.39(9)  | <b>N4-Al-N10</b>  | 170.19(17) |
| <b>N2-C36</b>      | 1.446(7) | <b>N1-C15</b>      | 1.489(9) | <b>N3-Al1-N9</b> | 167.36(10) | <b>O7-Al-O6</b>   | 168.23(14) |
| <b>N3-C8-C100</b>  | 109.9(3) | <b>N5-C10-C20</b>  | 99.6(3)  | <b>O7-Al1-O6</b> | 91.10(10)  | <b>N4-Al1-O2</b>  | 80.43(15)  |
| <b>N3-C8-C7</b>    | 110.5(3) | <b>N5-C10-C6</b>   | 109.6(3) | <b>O2-Al1-N9</b> | 90.24(9)   | <b>N4-Al1-O3</b>  | 92.43(17)  |
| <b>C100-C8-C7</b>  | 110.6(3) | <b>C20-C10-C6</b>  | 111.4(3) | <b>O6-Al1-O1</b> | 90.21(10)  | <b>N10-Al1-O3</b> | 92.15(15)  |
| <b>N3-C8-C25</b>   | 98.7(2)  | <b>N5-C10-C11</b>  | 111.3(3) | <b>O7-Al1-N3</b> | 97.59(9)   | <b>N10-Al1-O2</b> | 94.01(14)  |
| <b>C100-C8-C25</b> | 113.8(3) | <b>C20-C10-C11</b> | 114.1(3) | <b>O6-Al1-N3</b> | 90.13(9)   | <b>N10-Al1-O6</b> | 78.87(15)  |
| <b>C7-C8-C25</b>   | 112.7(3) | <b>C6-C10-C11</b>  | 110.4(3) | <b>O1-Al1-N3</b> | 93.58(9)   | <b>N10-Al1-O6</b> | 89.78(14)  |
|                    |          |                    |          | <b>O2-Al1-N3</b> | 79.29(9)   | <b>N4-Al1-O6</b>  | 92.69(15)  |
|                    |          |                    |          | <b>O7-Al1-N9</b> | 89.60(9)   | <b>N4-Al1-O7</b>  | 98.38(17)  |

### Electrochemical study

The electrochemical behavior of the metal bound chemosensor complexes (**1-6**) was studied in acetonitrile medium containing 0.1 M tetrabutylammonium perchlorate as a supporting electrolyte in a conventional three-electrode configuration using a Pt disk working electrode, Pt auxiliary electrode and Ag/AgCl reference electrode. All electrochemical data are collected in Table S4. Interestingly we are only able to collect data for Fe<sup>3+</sup> and Cr<sup>3+</sup> bound chemosensor complexes (**2**, **3**, **5** and **6**) and all the peaks are irreversible in nature. The reductive response at -0.44 V and the oxidative response at 1.26 V may be

assigned to FeIII/FeII and FeIII/FeIV couple. The lowest potential cathodic response occurs near -0.59 V has been assigned to the Cr(III)/Cr(II) couple. Rest of the oxidative peaks appears in all the compounds are probably due to ligand based oxidations.

**Table S4.** Electrochemical Data for complexes **2**, **3**, **5** and **6**.

| Complex    | E <sub>p</sub> (V)            |
|------------|-------------------------------|
| <b>HL1</b> | 0.33, 0.90, 1.33              |
| <b>HL2</b> | 0.31, 1.16, 1.33              |
| <b>2</b>   | 0.33, 0.92, -0.59             |
| <b>3</b>   | 0.877, 1.48, 1.26, -0.44      |
| <b>5</b>   | 0.33, 0.95, 1.15, 1.51, -0.58 |
| <b>6</b>   | 0.32, 0.90, 1.28, 1.49, -0.44 |

**Table S5.** Energy (eV) and composition (%) of selected M.O.s of **HL1** and **HL2**.

| M.O.s  | HL1 Energy(eV) |       | HL2 Energy(eV) |       |
|--------|----------------|-------|----------------|-------|
|        | Enol           | Keto  | Enol           | Keto  |
| LUMO+5 | 1.48           | 1.35  | 1.12           | 1.37  |
| LUMO+4 | 1.2            | 1.02  | 0.66           | 1.03  |
| LUMO+3 | 1.05           | 0.84  | 0.43           | 0.86  |
| LUMO+2 | 0.79           | 0.21  | -0.37          | 0.23  |
| LUMO+1 | -0.12          | -0.04 | -0.6           | 0     |
| LUMO   | -0.53          | -0.5  | -3.19          | -0.45 |
| HOMO   | -6.43          | -6.06 | -5.68          | -6    |
| HOMO-1 | -6.57          | -6.67 | -6.55          | -6.66 |
| HOMO-2 | -6.64          | -6.79 | -7.35          | -6.78 |
| HOMO-3 | -7.18          | -7.32 | -7.61          | -7.31 |
| HOMO-4 | -7.2           | -7.42 | -7.83          | -7.37 |
| HOMO-5 | -7.55          | -7.59 | -7.84          | -7.49 |

**Table S6.** Electronic transition calculated by TDDFT using CAM-B3LYP/CPCM method in methanol solvent of chemosensors enol form (**HL1** and **HL2**) (Used number of states = 20).

| Probe             | E <sub>excitation</sub> (ev) | λ <sub>excitation</sub> (nm) | Osc. frequency | Key transation                            | Experimental |
|-------------------|------------------------------|------------------------------|----------------|-------------------------------------------|--------------|
| <b>HL1 (enol)</b> | 29575.75                     | 338.1149                     | 0.9577         | HOMO-2→LUMO (89%)                         | 360          |
|                   | 32361.61                     | 309.0081                     | 0.6827         | HOMO-2→LUMO+1 (56%),<br>HOMO→LUMO+1 (12%) | 310          |
| <b>HL2 (enol)</b> | 29370.08                     | 340.4826                     | 1.0739         | HOMO-2→LUMO (89%)                         | 360          |
|                   | 32192.23                     | 310.634                      | 0.6948         | HOMO-2→LUMO+1 (53%)<br>HOMO→LUMO+1(14%)   | 310          |
| <b>HL1 (Keto)</b> | 26710.04                     | 374.391                      | 0.728          | HOMO-2→LUMO (83%),<br>HOMO→LUMO+1 (10%)   | 360          |
|                   |                              |                              |                | HOMO→LUMO (10%),<br>HOMO→LUMO+1           | 360          |

|                   |          |          |        |                                                                                           |     |
|-------------------|----------|----------|--------|-------------------------------------------------------------------------------------------|-----|
|                   |          |          |        | (80%)                                                                                     |     |
|                   | 32425.33 | 308.4009 | 0.0104 | HOMO-11→LUMO+1 (11%),<br>HOMO-9→LUMO (10%),<br>HOMO-9→LUMO+1 (27%)                        | 310 |
| <b>HL2 (Keto)</b> | 26624.55 | 375.5933 | 0.7514 | HOMO→LUMO (86%)                                                                           | 360 |
|                   | 29166.02 | 342.8648 | 0.7536 | HOMO→LUMO+1 (84%)                                                                         | 360 |
|                   | 32407.58 | 308.5698 | 0.0097 | HOMO-11→LUMO+1 (11%)<br>HOMO-9→LUMO (15%),<br>HOMO-9→LUMO+1 (32%),<br>HOMO-6→LUMO+1 (10%) | 310 |

**Chart. S1** Literature survey of rhodamine based derivatives used in sensing of Al<sup>3+</sup>, Cr<sup>3+</sup> and Fe<sup>3+</sup> ions.

| Sl. No. | Probe                                                                               | Crystal structure of metal-bound chemosensor(L) | Sensing Medium                                  | Limit of detection (LOD)                                                                                                                    | Biological study | Fluorescence intensity enhancement                                               | Refs.      |
|---------|-------------------------------------------------------------------------------------|-------------------------------------------------|-------------------------------------------------|---------------------------------------------------------------------------------------------------------------------------------------------|------------------|----------------------------------------------------------------------------------|------------|
| 1.      | 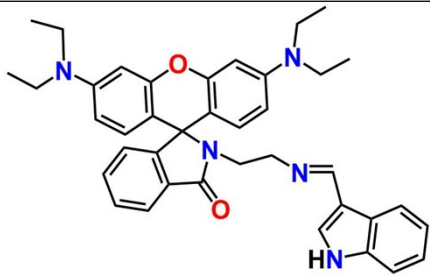 | No                                              | CH <sub>3</sub> CN:H <sub>2</sub> O (1:1, v/v)  | 12×10 <sup>-6</sup> M(Al <sup>3+</sup> ),<br>15×10 <sup>-6</sup> M(Cr <sup>3+</sup> ),<br>20×10 <sup>-6</sup> M (Fe <sup>3+</sup> )         | No               | --                                                                               | <b>24a</b> |
| 2.      |  | No                                              | MeOH-H <sub>2</sub> O (6:4, v/v)                | 1.74×10 <sup>-9</sup> M (Al <sup>3+</sup> ),<br>2.36×10 <sup>-6</sup> M (Cr <sup>3+</sup> ),<br>2.90×10 <sup>-6</sup> M(Fe <sup>3+</sup> )  | No               | 62 (Al <sup>3+</sup> ),<br>1.7 (Cr <sup>3+</sup> ), 1.47 (Fe <sup>3+</sup> )     | <b>24b</b> |
| 3.      |  | No                                              | H <sub>2</sub> O:methanol (3:7, v/v)            | 1.18×10 <sup>-9</sup> M(Al <sup>3+</sup> ),<br>1.80×10 <sup>-6</sup> M (Cr <sup>3+</sup> ),<br>4.04×10 <sup>-6</sup> M (Fe <sup>3+</sup> )  | No               | 98 (Al <sup>3+</sup> ),<br>50 (Cr <sup>3+</sup> ),<br>38 (Fe <sup>3+</sup> )     | <b>24c</b> |
| 4.      |  | No                                              | CH <sub>3</sub> OH-H <sub>2</sub> O, (9:1, v/v) | 6.87×10 <sup>-9</sup> M (Al <sup>3+</sup> ),<br>15.8×10 <sup>-6</sup> M (Cr <sup>3+</sup> ),<br>14.0×10 <sup>-6</sup> M (Fe <sup>3+</sup> ) | Yes              | 1465 (Al <sup>3+</sup> ),<br>588 (Cr <sup>3+</sup> ),<br>800 (Fe <sup>3+</sup> ) | <b>24d</b> |

|     |  |     |                                                                            |                                                                                                                                                                                             |     |                                                                                                         |            |
|-----|--|-----|----------------------------------------------------------------------------|---------------------------------------------------------------------------------------------------------------------------------------------------------------------------------------------|-----|---------------------------------------------------------------------------------------------------------|------------|
| 5.  |  | No  | methanol/H <sub>2</sub> O (1 : 1, v/v, pH 7.2)                             | 0.34×10 <sup>-6</sup> M (Al <sup>3+</sup> ),<br>0.29×10 <sup>-6</sup> M (Cr <sup>3+</sup> ),<br>0.31×10 <sup>-6</sup> M (Fe <sup>3+</sup> )                                                 | Yes | 14 (Al <sup>3+</sup> ),<br>10 (Cr <sup>3+</sup> ),<br>21 (Fe <sup>3+</sup> )                            | <b>24e</b> |
| 6.  |  | No  | water/ethanol (14:1, v/v)                                                  | 23.5×10 <sup>-9</sup> M (Al <sup>3+</sup> ),<br>13.4×10 <sup>-9</sup> M (Cr <sup>3+</sup> ),<br>69.7×10 <sup>-9</sup> M (Fe <sup>3+</sup> )                                                 | NO  | 145 (Al <sup>3+</sup> ),<br>174 (Cr <sup>3+</sup> ),<br>30 (Fe <sup>3+</sup> )                          | <b>24f</b> |
| 7.  |  | No  | H <sub>2</sub> O/CH <sub>3</sub> CN (4:1),v/v                              | 1.34×10 <sup>-6</sup> M (Al <sup>3+</sup> ),<br>2.28×10 <sup>-6</sup> M (Cr <sup>3+</sup> ),<br>1.28×10 <sup>-6</sup> M (Fe <sup>3+</sup> )                                                 | Yes | 31 (Al <sup>3+</sup> ),<br>26 (Cr <sup>3+</sup> ),<br>41 (Fe <sup>3+</sup> )                            | <b>24g</b> |
| 8.  |  | No  | HEPES-buffered MeOH/H <sub>2</sub> O                                       | 1.61×10 <sup>-7</sup> M (Al <sup>3+</sup> ),<br>8.91×10 <sup>-8</sup> M (Cr <sup>3+</sup> ),<br>8.74×10 <sup>-8</sup> M (Fe <sup>3+</sup> )                                                 | No  | --                                                                                                      | <b>24h</b> |
| 9.  |  | No  | H <sub>2</sub> O/CH <sub>3</sub> CN (7:3, v/v, pH 7.2, 20 mM HEPES buffer) | 0.74×10 <sup>-6</sup> M (Al <sup>3+</sup> ),<br>0.47×10 <sup>-6</sup> M (Cr <sup>3+</sup> ),<br>2.57×10 <sup>-6</sup> M (Fe <sup>3+</sup> )                                                 | No  | 653 (Al <sup>3+</sup> ),<br>667 (Cr <sup>3+</sup> ),<br>669 (Fe <sup>3+</sup> )                         | <b>24i</b> |
| 10. |  | No  | EtOH<br>water/acetonitrile (14 : 1, v/v) (pH 7.2, 10 mM HEPES buffer)      | 3.79×10 <sup>-7</sup> M (Al <sup>3+</sup> ),<br>14.8×10 <sup>-7</sup> M (Cr <sup>3+</sup> ),<br>3.29×10 <sup>-7</sup> M (Fe <sup>3+</sup> ),<br>0.74×10 <sup>-7</sup> M (Cu <sup>2+</sup> ) | No  | 36 (Al <sup>3+</sup> ),<br>17 (Cr <sup>3+</sup> ),<br>40 (Fe <sup>3+</sup> ),<br>89 (Cu <sup>2+</sup> ) | <b>24j</b> |
| 11. |  | No  | aqueous medium                                                             | 24×10 <sup>-9</sup> M (Al <sup>3+</sup> ),<br>27×10 <sup>-9</sup> M (Cr <sup>3+</sup> ),                                                                                                    | No  | --                                                                                                      | <b>24k</b> |
| 12. |  | Yes | H <sub>2</sub> O–EtOH (4 : 1, v/v)                                         | 3.26 × 10 <sup>-6</sup> M (Al <sup>3+</sup> )                                                                                                                                               | Yes | --                                                                                                      | <b>24l</b> |

| 13. | 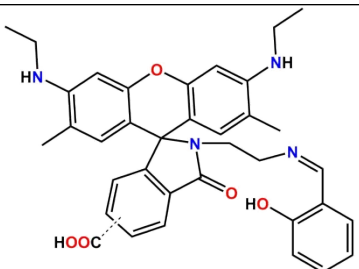                                                                                                                                                                                                                                                                                                                                         | No  | Water, 10 mM with Tris-HCl buffer solution (pH = 7.4).         | $5.2 \times 10^{-6}$ M ( $\text{Fe}^{3+}$ )                                                                                                    | Yes | >200 ( $\text{Fe}^{3+}$ )                                                          | <b>24m</b>       |     |    |   |     |    |   |     |    |   |    |                           |                                       |     |                                                                                                                              |            |
|-----|--------------------------------------------------------------------------------------------------------------------------------------------------------------------------------------------------------------------------------------------------------------------------------------------------------------------------------------------------------------------------------------------------------------------------|-----|----------------------------------------------------------------|------------------------------------------------------------------------------------------------------------------------------------------------|-----|------------------------------------------------------------------------------------|------------------|-----|----|---|-----|----|---|-----|----|---|----|---------------------------|---------------------------------------|-----|------------------------------------------------------------------------------------------------------------------------------|------------|
| 14. |                                                                                                                                                                                                                                                                                                                                          | No  | MeOH/H <sub>2</sub> O (1/4, v/v), HEPES buffer (10 mM), pH 7.2 | $6.7 \times 10^{-8}$ M ( $\text{Al}^{3+}$ ),                                                                                                   | Yes | --                                                                                 | <b>24n</b>       |     |    |   |     |    |   |     |    |   |    |                           |                                       |     |                                                                                                                              |            |
| 15. |                                                                                                                                                                                                                                                                                                                                         | No  | MeOH/H <sub>2</sub> O (1 : 1, v/v), HEPES, 0.5 mM, pH = 7.35   | $0.314 \times 10^{-6}$ M ( $\text{Al}^{3+}$ )                                                                                                  | Yes | ---                                                                                | <b>24o</b>       |     |    |   |     |    |   |     |    |   |    |                           |                                       |     |                                                                                                                              |            |
| 16. |                                                                                                                                                                                                                                                                                                                                        | No  | Ethanol                                                        | $40 \times 10^{-6}$ M ( $\text{Fe}^{3+}$ )                                                                                                     | No  | --                                                                                 | <b>24p</b>       |     |    |   |     |    |   |     |    |   |    |                           |                                       |     |                                                                                                                              |            |
| 17. | <br><table border="1" data-bbox="138 1545 397 1747"> <thead> <tr> <th></th> <th>x</th> <th>n</th> </tr> </thead> <tbody> <tr> <td>HL1</td> <td>Br</td> <td>0</td> </tr> <tr> <td>HL2</td> <td>Cl</td> <td>0</td> </tr> <tr> <td>HL3</td> <td>Br</td> <td>3</td> </tr> <tr> <td>HL4</td> <td>Cl</td> <td>3</td> </tr> </tbody> </table> |     | x                                                              | n                                                                                                                                              | HL1 | Br                                                                                 | 0                | HL2 | Cl | 0 | HL3 | Br | 3 | HL4 | Cl | 3 | No | water:methanol (9:1, v/v) | $\sim 10^{-9}$ M ( $\text{Al}^{3+}$ ) | Yes | 780(HL1)( $\text{Al}^{3+}$ )<br>725(HL2)( $\text{Al}^{3+}$ )<br>425(HL3)( $\text{Al}^{3+}$ )<br>391(HL4)( $\text{Al}^{3+}$ ) | <b>24q</b> |
|     | x                                                                                                                                                                                                                                                                                                                                                                                                                        | n   |                                                                |                                                                                                                                                |     |                                                                                    |                  |     |    |   |     |    |   |     |    |   |    |                           |                                       |     |                                                                                                                              |            |
| HL1 | Br                                                                                                                                                                                                                                                                                                                                                                                                                       | 0   |                                                                |                                                                                                                                                |     |                                                                                    |                  |     |    |   |     |    |   |     |    |   |    |                           |                                       |     |                                                                                                                              |            |
| HL2 | Cl                                                                                                                                                                                                                                                                                                                                                                                                                       | 0   |                                                                |                                                                                                                                                |     |                                                                                    |                  |     |    |   |     |    |   |     |    |   |    |                           |                                       |     |                                                                                                                              |            |
| HL3 | Br                                                                                                                                                                                                                                                                                                                                                                                                                       | 3   |                                                                |                                                                                                                                                |     |                                                                                    |                  |     |    |   |     |    |   |     |    |   |    |                           |                                       |     |                                                                                                                              |            |
| HL4 | Cl                                                                                                                                                                                                                                                                                                                                                                                                                       | 3   |                                                                |                                                                                                                                                |     |                                                                                    |                  |     |    |   |     |    |   |     |    |   |    |                           |                                       |     |                                                                                                                              |            |
| 18. | <b>HL1</b>                                                                                                                                                                                                                                                                                                                                                                                                               | Yes | water:methanol (1:9, v/v)                                      | $2.86 \times 10^{-8}$ M ( $\text{Al}^{3+}$ ),<br>$2.67 \times 10^{-8}$ M ( $\text{Cr}^{3+}$ ),<br>$5.62 \times 10^{-6}$ M ( $\text{Fe}^{3+}$ ) | Yes | 400 ( $\text{Al}^{3+}$ ),<br>380 ( $\text{Cr}^{3+}$ ),<br>100 ( $\text{Fe}^{3+}$ ) | <b>This work</b> |     |    |   |     |    |   |     |    |   |    |                           |                                       |     |                                                                                                                              |            |
| 19. | <b>HL2</b>                                                                                                                                                                                                                                                                                                                                                                                                               | Yes | water:methanol (1:9, v/v)                                      | $2.78 \times 10^{-8}$ M ( $\text{Al}^{3+}$ ),<br>$2.61 \times 10^{-8}$ M ( $\text{Cr}^{3+}$ ),<br>$6.14 \times 10^{-6}$ M ( $\text{Fe}^{3+}$ ) | Yes | 396 ( $\text{Al}^{3+}$ ),<br>390 ( $\text{Cr}^{3+}$ ),<br>100 ( $\text{Fe}^{3+}$ ) | <b>This work</b> |     |    |   |     |    |   |     |    |   |    |                           |                                       |     |                                                                                                                              |            |

**Table S7 Cartesian Coordinates of the optimized species**

**Keto form of HL1**

|   |              |              |              |
|---|--------------|--------------|--------------|
| 8 | -0.588775000 | -2.798812000 | 0.192668000  |
| 8 | 2.763804000  | 0.528391000  | -1.963802000 |
| 8 | -2.678875000 | -4.190594000 | -0.648359000 |
| 8 | 0.847358000  | -0.263225000 | 4.000223000  |
| 7 | 0.445381000  | -0.651282000 | 1.216528000  |
| 7 | 1.470673000  | 0.044889000  | 1.790706000  |
| 7 | 0.677508000  | 4.769993000  | -2.414346000 |
| 6 | -4.134003000 | -2.332722000 | -0.154429000 |
| 6 | 2.931707000  | 0.821945000  | 3.338158000  |
| 6 | 1.721259000  | 2.599925000  | -2.152542000 |
| 6 | -3.185990000 | -0.300321000 | 0.786124000  |
| 6 | 1.028186000  | 3.862045000  | -0.201955000 |
| 6 | 3.792681000  | -1.657929000 | 0.783442000  |
| 6 | 4.352748000  | -2.709849000 | 0.088996000  |
| 6 | 1.516615000  | 2.839026000  | 0.584078000  |
| 6 | -4.275245000 | -0.990283000 | 0.346244000  |
| 6 | 1.631487000  | 0.130956000  | 3.165097000  |
| 6 | 3.835985000  | -1.535795000 | -1.967284000 |
| 6 | 3.267902000  | -0.504614000 | -1.225185000 |
| 6 | 3.237069000  | -0.531984000 | 0.161266000  |
| 6 | 1.132330000  | 3.739342000  | -1.612780000 |
| 6 | -2.921317000 | -2.938966000 | -0.201119000 |
| 6 | -0.794700000 | -0.180475000 | 1.218398000  |
| 6 | -1.891840000 | -0.892664000 | 0.752680000  |
| 6 | 2.596495000  | 0.574848000  | 0.971114000  |
| 6 | -1.701948000 | -2.247110000 | 0.247922000  |
| 6 | 2.113479000  | 1.683505000  | 0.061686000  |
| 6 | 3.492643000  | 1.079858000  | 2.095237000  |
| 6 | 2.204350000  | 1.593164000  | -1.318879000 |
| 6 | -7.881450000 | 1.015664000  | 0.593604000  |

|   |               |              |              |
|---|---------------|--------------|--------------|
| 6 | -10.101850000 | -0.386320000 | -0.348240000 |
| 6 | -9.139274000  | 1.597210000  | 0.625735000  |
| 6 | -8.843133000  | -0.973501000 | -0.381940000 |
| 6 | 4.789811000   | 1.826841000  | 4.429260000  |
| 6 | -3.783874000  | -4.938110000 | -1.099077000 |
| 6 | 6.377796000   | -2.850097000 | -3.861074000 |
| 6 | 5.163629000   | -3.688505000 | -3.460153000 |
| 6 | 4.717477000   | 1.722320000  | 2.000859000  |
| 6 | 4.375622000   | -2.651268000 | -1.330379000 |
| 6 | 4.910671000   | -3.907270000 | 0.809014000  |
| 6 | -7.729807000  | -0.278066000 | 0.086220000  |
| 6 | 0.548610000   | 4.623592000  | -3.851065000 |
| 6 | 3.560720000   | 1.185535000  | 4.520202000  |
| 6 | 5.358878000   | 2.091279000  | 3.179974000  |
| 6 | -10.252485000 | 0.900816000  | 0.155798000  |
| 6 | 0.411305000   | 5.091369000  | 0.408001000  |
| 6 | -0.052623000  | 5.882104000  | -4.457498000 |
| 1 | -5.038043000  | -2.825863000 | -0.485662000 |
| 1 | 1.816460000   | 2.457316000  | -3.220989000 |
| 1 | -3.320823000  | 0.708325000  | 1.164494000  |
| 1 | 3.776898000   | -1.708308000 | 1.869208000  |
| 1 | 1.440034000   | 2.935569000  | 1.664298000  |
| 1 | 3.827647000   | -1.439281000 | -3.045089000 |
| 1 | -0.913514000  | 0.823137000  | 1.616324000  |
| 1 | -7.004673000  | 1.539570000  | 0.954623000  |
| 1 | -10.964935000 | -0.933555000 | -0.714573000 |
| 1 | -9.257445000  | 2.601870000  | 1.020840000  |
| 1 | -8.694974000  | -1.976310000 | -0.768629000 |
| 1 | 5.313864000   | 2.126354000  | 5.331194000  |
| 1 | -3.390627000  | -5.906463000 | -1.409986000 |
| 1 | -4.522460000  | -5.082557000 | -0.300472000 |

|   |               |              |              |
|---|---------------|--------------|--------------|
| 1 | -4.275528000  | -4.452310000 | -1.951498000 |
| 1 | 7.289444000   | -3.244003000 | -3.400338000 |
| 1 | 6.514525000   | -2.861719000 | -4.947242000 |
| 1 | 6.261920000   | -1.810841000 | -3.541502000 |
| 1 | 5.304041000   | -4.725219000 | -3.781482000 |
| 1 | 4.266011000   | -3.333415000 | -3.975866000 |
| 1 | 5.164162000   | 1.931071000  | 1.033968000  |
| 1 | 4.777789000   | -3.807533000 | 1.888580000  |
| 1 | 5.986344000   | -4.037885000 | 0.626691000  |
| 1 | 4.411138000   | -4.832927000 | 0.498141000  |
| 1 | 1.543845000   | 4.451570000  | -4.276556000 |
| 1 | -0.064251000  | 3.746614000  | -4.112995000 |
| 1 | 3.094034000   | 0.967674000  | 5.475205000  |
| 1 | 6.319732000   | 2.594163000  | 3.128736000  |
| 1 | 0.468862000   | 5.055709000  | 1.498375000  |
| 1 | 0.920159000   | 6.003916000  | 0.075077000  |
| 1 | -0.650232000  | 5.197931000  | 0.144759000  |
| 1 | -1.061495000  | 6.063983000  | -4.070195000 |
| 1 | 0.565020000   | 6.755769000  | -4.229862000 |
| 1 | -0.127941000  | 5.786705000  | -5.543701000 |
| 7 | -5.504957000  | -0.320611000 | 0.416776000  |
| 7 | -6.493437000  | -0.971048000 | 0.005454000  |
| 7 | 4.894742000   | -3.716788000 | -2.036111000 |
| 1 | 0.564982000   | -1.620265000 | 0.882833000  |
| 1 | -0.028109000  | 5.355560000  | -1.991657000 |
| 1 | 5.465633000   | -4.352620000 | -1.501842000 |
| 1 | -11.234447000 | 1.363145000  | 0.184854000  |

**Enol form of HL1**

|   |              |             |              |
|---|--------------|-------------|--------------|
| 8 | -0.698463000 | 0.297496000 | -1.533754000 |
| 8 | 2.980093000  | 0.353667000 | -1.632892000 |



|   |               |              |              |
|---|---------------|--------------|--------------|
| 8 | -2.674739000  | 0.651882000  | -3.179687000 |
| 8 | 0.146769000   | -0.901287000 | 3.798452000  |
| 7 | 0.144458000   | -0.253306000 | 0.904930000  |
| 7 | 1.178416000   | -0.434072000 | 1.765415000  |
| 7 | 3.139943000   | 5.033678000  | -0.836766000 |
| 6 | -4.309726000  | 0.232852000  | -1.437998000 |
| 6 | 2.559744000   | -0.800649000 | 3.532945000  |
| 6 | 3.036076000   | 2.642248000  | -1.213947000 |
| 6 | -3.485985000  | -0.268195000 | 0.776757000  |
| 6 | 2.821966000   | 3.531796000  | 1.030548000  |
| 6 | 2.805262000   | -2.681359000 | 0.398300000  |
| 6 | 2.968007000   | -3.654846000 | -0.565847000 |
| 6 | 2.704586000   | 2.236965000  | 1.491310000  |
| 6 | -4.547497000  | -0.080960000 | -0.085776000 |
| 6 | 1.141266000   | -0.732433000 | 3.112207000  |
| 6 | 3.137543000   | -1.892113000 | -2.218784000 |
| 6 | 2.961041000   | -0.945712000 | -1.213030000 |
| 6 | 2.795965000   | -1.310186000 | 0.114681000  |
| 6 | 2.990089000   | 3.741901000  | -0.363022000 |
| 6 | -3.019565000  | 0.354243000  | -1.902699000 |
| 6 | -1.081580000  | -0.355620000 | 1.282870000  |
| 6 | -2.163364000  | -0.149589000 | 0.326875000  |
| 6 | 2.555348000   | -0.282630000 | 1.198963000  |
| 6 | -1.921541000  | 0.164278000  | -1.021633000 |
| 6 | 2.748265000   | 1.115545000  | 0.652860000  |
| 6 | 3.381192000   | -0.544094000 | 2.446626000  |
| 6 | 2.917556000   | 1.351801000  | -0.702684000 |
| 6 | -8.308004000  | -0.506818000 | 1.594957000  |
| 6 | -10.450158000 | -0.114428000 | -0.150185000 |
| 6 | -9.611090000  | -0.623750000 | 2.052236000  |
| 6 | -9.145452000  | 0.003809000  | -0.613385000 |

|   |               |              |              |
|---|---------------|--------------|--------------|
| 6 | 4.449709000   | -1.080618000 | 4.946872000  |
| 6 | -3.718779000  | 0.844604000  | -4.105518000 |
| 6 | 5.131679000   | -3.583801000 | -4.429396000 |
| 6 | 3.653610000   | -3.936678000 | -4.259954000 |
| 6 | 4.759550000   | -0.551357000 | 2.593740000  |
| 6 | 3.135880000   | -3.251549000 | -1.917039000 |
| 6 | 2.948467000   | -5.115890000 | -0.205834000 |
| 6 | -8.072661000  | -0.190989000 | 0.253943000  |
| 6 | 3.082667000   | 5.337352000  | -2.253393000 |
| 6 | 3.068793000   | -1.072036000 | 4.795068000  |
| 6 | 5.283677000   | -0.822228000 | 3.854668000  |
| 6 | -10.684909000 | -0.428499000 | 1.183719000  |
| 6 | 2.781786000   | 4.703239000  | 1.973885000  |
| 6 | 3.182010000   | 6.838742000  | -2.474928000 |
| 1 | -0.048643000  | 0.135849000  | -0.806037000 |
| 1 | -5.166614000  | 0.371902000  | -2.082782000 |
| 1 | 3.154819000   | 2.750676000  | -2.283977000 |
| 1 | -3.692231000  | -0.509320000 | 1.814350000  |
| 1 | 2.669988000   | -2.996145000 | 1.429693000  |
| 1 | 2.570748000   | 2.079260000  | 2.558248000  |
| 1 | 3.266003000   | -1.528223000 | -3.229804000 |
| 1 | -1.343227000  | -0.593262000 | 2.309509000  |
| 1 | -7.460106000  | -0.654509000 | 2.252843000  |
| 1 | -11.282634000 | 0.038437000  | -0.829910000 |
| 1 | -9.795733000  | -0.869079000 | 3.093777000  |
| 1 | -8.930481000  | 0.247668000  | -1.648465000 |
| 1 | 4.887707000   | -1.288518000 | 5.917908000  |
| 1 | -3.239572000  | 1.065712000  | -5.059724000 |
| 1 | -4.336699000  | -0.056031000 | -4.209186000 |
| 1 | -4.362177000  | 1.685737000  | -3.818451000 |
| 1 | 5.767635000   | -4.414301000 | -4.105902000 |

|   |               |              |              |
|---|---------------|--------------|--------------|
| 1 | 5.361000000   | -3.370437000 | -5.478458000 |
| 1 | 5.397796000   | -2.705389000 | -3.835173000 |
| 1 | 3.411163000   | -4.821421000 | -4.857083000 |
| 1 | 3.021304000   | -3.131336000 | -4.646019000 |
| 1 | 5.410964000   | -0.350931000 | 1.749157000  |
| 1 | 2.764194000   | -5.249558000 | 0.862575000  |
| 1 | 3.901650000   | -5.613341000 | -0.433011000 |
| 1 | 2.162596000   | -5.655516000 | -0.748525000 |
| 1 | 3.920681000   | 4.838142000  | -2.753047000 |
| 1 | 2.161157000   | 4.946229000  | -2.712876000 |
| 1 | 2.396095000   | -1.268415000 | 5.623383000  |
| 1 | 6.360461000   | -0.832831000 | 3.993197000  |
| 1 | 2.712898000   | 4.365489000  | 3.010501000  |
| 1 | 3.679990000   | 5.325685000  | 1.881906000  |
| 1 | 1.915581000   | 5.353879000  | 1.789922000  |
| 1 | 2.340199000   | 7.363227000  | -2.008710000 |
| 1 | 4.109440000   | 7.233157000  | -2.049502000 |
| 1 | 3.165887000   | 7.071618000  | -3.542777000 |
| 7 | -5.834493000  | -0.222313000 | 0.472913000  |
| 7 | -6.782418000  | -0.046037000 | -0.322407000 |
| 7 | 3.252270000   | -4.220868000 | -2.895885000 |
| 1 | -11.702720000 | -0.521951000 | 1.549912000  |
| 1 | 3.508198000   | -5.136572000 | -2.560264000 |
| 1 | 2.737667000   | 5.746682000  | -0.245441000 |

**Enol form of HL2**

|   |              |              |              |
|---|--------------|--------------|--------------|
| 8 | -0.349098000 | 0.316519000  | -1.523356000 |
| 8 | 3.128755000  | 0.350253000  | -1.613203000 |
| 8 | -2.275985000 | 0.708991000  | -3.223801000 |
| 8 | 0.385547000  | -0.927651000 | 3.800485000  |

|   |               |              |              |
|---|---------------|--------------|--------------|
| 7 | 0.412940000   | -0.256317000 | 0.918738000  |
| 7 | 1.437275000   | -0.452679000 | 1.783308000  |
| 7 | 3.462836000   | 5.013402000  | -0.768225000 |
| 6 | -3.967735000  | 0.297992000  | -1.532992000 |
| 6 | 2.804659000   | -0.855141000 | 3.552104000  |
| 6 | 3.267500000   | 2.633827000  | -1.170099000 |
| 6 | -3.212337000  | -0.227868000 | 0.702128000  |
| 6 | 3.181342000   | 3.499348000  | 1.095140000  |
| 6 | 3.089697000   | -2.705420000 | 0.398874000  |
| 6 | 3.232877000   | -3.669668000 | -0.578159000 |
| 6 | 3.051921000   | 2.201253000  | 1.544354000  |
| 6 | -4.246526000  | -0.022017000 | -0.190651000 |
| 6 | 1.392109000   | -0.764319000 | 3.123991000  |
| 6 | 3.306275000   | -1.890715000 | -2.224375000 |
| 6 | 3.153219000   | -0.955860000 | -1.204098000 |
| 6 | 3.045910000   | -1.331002000 | 0.126699000  |
| 6 | 3.292515000   | 3.725867000  | -0.304007000 |
| 6 | -2.661767000  | 0.406724000  | -1.960096000 |
| 6 | -0.820740000  | -0.348591000 | 1.272487000  |
| 6 | -1.876411000  | -0.122723000 | 0.289945000  |
| 6 | 2.822197000   | -0.312620000 | 1.222477000  |
| 6 | -1.595261000  | 0.196395000  | -1.048483000 |
| 6 | 3.028731000   | 1.088601000  | 0.690708000  |
| 6 | 3.635853000   | -0.598429000 | 2.471706000  |
| 6 | 3.139536000   | 1.340488000  | -0.668233000 |
| 6 | -8.077008000  | -0.412539000 | 1.376426000  |
| 6 | -10.149197000 | 0.003875000  | -0.434380000 |
| 6 | -9.394959000  | -0.514833000 | 1.784457000  |
| 6 | -8.828254000  | 0.109266000  | -0.854962000 |
| 6 | 4.685093000   | -1.174855000 | 4.972288000  |
| 6 | -3.293563000  | 0.934031000  | -4.183602000 |

|   |               |              |              |
|---|---------------|--------------|--------------|
| 6 | 5.272530000   | -3.544874000 | -4.494176000 |
| 6 | 3.802057000   | -3.910817000 | -4.297146000 |
| 6 | -11.880959000 | -0.432765000 | 1.355321000  |
| 6 | 5.013395000   | -0.625650000 | 2.625103000  |
| 6 | 3.341683000   | -3.254986000 | -1.934396000 |
| 6 | 3.261006000   | -5.132785000 | -0.226225000 |
| 6 | -7.785321000  | -0.097383000 | 0.044126000  |
| 6 | 3.354075000   | 5.341922000  | -2.179011000 |
| 6 | 3.304862000   | -1.146285000 | 4.814322000  |
| 6 | 5.527850000   | -0.916571000 | 3.886285000  |
| 6 | -10.454604000 | -0.309759000 | 0.889108000  |
| 6 | 3.217005000   | 4.658064000  | 2.054571000  |
| 6 | 3.500132000   | 6.841394000  | -2.384993000 |
| 1 | -4.799613000  | 0.453197000  | -2.206015000 |
| 1 | 3.346481000   | 2.756735000  | -2.242578000 |
| 1 | -3.447549000  | -0.472998000 | 1.732526000  |
| 1 | 3.001598000   | -3.031656000 | 1.431729000  |
| 1 | 2.964530000   | 2.034764000  | 2.614635000  |
| 1 | 3.397151000   | -1.520070000 | -3.237302000 |
| 1 | -1.109293000  | -0.591220000 | 2.290040000  |
| 1 | -7.262186000  | -0.571786000 | 2.072547000  |
| 1 | -10.953651000 | 0.168211000  | -1.145242000 |
| 1 | -9.615984000  | -0.758628000 | 2.820167000  |
| 1 | -8.586036000  | 0.353615000  | -1.884131000 |
| 1 | 5.115198000   | -1.398550000 | 5.942869000  |
| 1 | -2.781300000  | 1.158903000  | -5.118702000 |
| 1 | -3.919792000  | 0.044820000  | -4.315724000 |
| 1 | -3.926245000  | 1.782757000  | -3.901179000 |
| 1 | 5.919533000   | -4.370737000 | -4.182240000 |
| 1 | 5.475750000   | -3.331859000 | -5.548378000 |
| 1 | 5.543822000   | -2.661360000 | -3.909307000 |

|   |               |              |              |
|---|---------------|--------------|--------------|
| 1 | 3.557264000   | -4.795387000 | -4.891747000 |
| 1 | 3.154941000   | -3.108700000 | -4.664667000 |
| 1 | -12.584351000 | -0.174776000 | 0.559866000  |
| 1 | -12.101874000 | -1.454912000 | 1.681683000  |
| 1 | -12.076347000 | 0.225254000  | 2.208405000  |
| 1 | 5.673902000   | -0.426212000 | 1.787497000  |
| 1 | 3.121043000   | -5.275036000 | 0.847686000  |
| 1 | 4.215178000   | -5.603852000 | -0.496200000 |
| 1 | 2.469815000   | -5.689116000 | -0.743295000 |
| 1 | 4.146219000   | 4.817722000  | -2.725294000 |
| 1 | 2.396761000   | 4.994038000  | -2.596626000 |
| 1 | 2.631850000   | -1.343379000 | 5.642106000  |
| 1 | 6.603316000   | -0.943362000 | 4.029505000  |
| 1 | 3.174385000   | 4.307792000  | 3.088331000  |
| 1 | 4.132283000   | 5.250229000  | 1.936608000  |
| 1 | 2.370976000   | 5.341908000  | 1.906529000  |
| 1 | 2.702479000   | 7.389201000  | -1.871823000 |
| 1 | 4.461428000   | 7.195062000  | -2.000729000 |
| 1 | 3.443180000   | 7.085673000  | -3.448743000 |
| 7 | -5.551871000  | -0.153230000 | 0.333646000  |
| 7 | -6.476847000  | 0.035039000  | -0.486399000 |
| 7 | 3.434631000   | -4.211586000 | -2.923331000 |
| 1 | 3.131971000   | 5.738088000  | -0.146604000 |
| 1 | 3.719617000   | -5.127033000 | -2.607495000 |
| 1 | 0.270713000   | 0.141921000  | -0.769091000 |

**Keto form of HL2**

|   |              |              |              |
|---|--------------|--------------|--------------|
| 8 | -0.251303000 | -2.842351000 | 0.192796000  |
| 8 | 3.025778000  | 0.572006000  | -1.959496000 |
| 8 | -2.301150000 | -4.289584000 | -0.653587000 |
| 8 | 1.105694000  | -0.263589000 | 3.999671000  |



|   |              |              |              |
|---|--------------|--------------|--------------|
| 7 | 0.722668000  | -0.666752000 | 1.215023000  |
| 7 | 1.727485000  | 0.056897000  | 1.791416000  |
| 7 | 0.825605000  | 4.754341000  | -2.424252000 |
| 6 | -3.806301000 | -2.469619000 | -0.167653000 |
| 6 | 3.162166000  | 0.875894000  | 3.342040000  |
| 6 | 1.927252000  | 2.613802000  | -2.155407000 |
| 6 | -2.915907000 | -0.411458000 | 0.771966000  |
| 6 | 1.188107000  | 3.856878000  | -0.209526000 |
| 6 | 4.094185000  | -1.586443000 | 0.794643000  |
| 6 | 4.683713000  | -2.624599000 | 0.103858000  |
| 6 | 1.700213000  | 2.848118000  | 0.579862000  |
| 6 | -3.984932000 | -1.130488000 | 0.330039000  |
| 6 | 1.881472000  | 0.149899000  | 3.166052000  |
| 6 | 4.149113000  | -1.464729000 | -1.955845000 |
| 6 | 3.551533000  | -0.447653000 | -1.217429000 |
| 6 | 3.513932000  | -0.475054000 | 0.168825000  |
| 6 | 1.303936000  | 3.736649000  | -1.619611000 |
| 6 | -2.577941000 | -3.043895000 | -0.209096000 |
| 6 | -0.529642000 | -0.228322000 | 1.211758000  |
| 6 | -1.606014000 | -0.969726000 | 0.744173000  |
| 6 | 2.841189000  | 0.615590000  | 0.974562000  |
| 6 | -1.378816000 | -2.319658000 | 0.242994000  |
| 6 | 2.331926000  | 1.709462000  | 0.061526000  |
| 6 | 3.719934000  | 1.146524000  | 2.100437000  |
| 6 | 2.433301000  | 1.621138000  | -1.318423000 |
| 6 | -7.651088000 | 0.775565000  | 0.556782000  |
| 6 | -9.825265000 | -0.684868000 | -0.375944000 |
| 6 | -8.923246000 | 1.318221000  | 0.583088000  |
| 6 | -8.551445000 | -1.239623000 | -0.406475000 |
| 6 | 4.988892000  | 1.932891000  | 4.436984000  |
| 6 | -3.384331000 | -5.065825000 | -1.108334000 |

|   |               |              |              |
|---|---------------|--------------|--------------|
| 6 | 6.729904000   | -2.719531000 | -3.837881000 |
| 6 | 5.534519000   | -3.586241000 | -3.440676000 |
| 6 | -11.410352000 | 1.209037000  | 0.164953000  |
| 6 | 4.927229000   | 1.821720000  | 2.008615000  |
| 6 | 4.712475000   | -2.566348000 | -1.315402000 |
| 6 | 5.267048000   | -3.807592000 | 0.827558000  |
| 6 | -7.456663000  | -0.516725000 | 0.057554000  |
| 6 | 0.709750000   | 4.604149000  | -3.861659000 |
| 6 | 3.777292000   | 1.258743000  | 4.525310000  |
| 6 | 5.554625000   | 2.210226000  | 3.188985000  |
| 6 | -10.033114000 | 0.600510000  | 0.119038000  |
| 6 | 0.533718000   | 5.068782000  | 0.396187000  |
| 6 | 0.080734000   | 5.846735000  | -4.472711000 |
| 1 | -4.696017000  | -2.986847000 | -0.501010000 |
| 1 | 2.032221000   | 2.473342000  | -3.223221000 |
| 1 | -3.078402000  | 0.594039000  | 1.147889000  |
| 1 | 4.073832000   | -1.636696000 | 1.880343000  |
| 1 | 1.614835000   | 2.942886000  | 1.659578000  |
| 1 | 4.144239000   | -1.368867000 | -3.033732000 |
| 1 | -0.675821000  | 0.772765000  | 1.606957000  |
| 1 | -6.792767000  | 1.330371000  | 0.916278000  |
| 1 | -10.671168000 | -1.260186000 | -0.741913000 |
| 1 | -9.067494000  | 2.323107000  | 0.972526000  |
| 1 | -8.381502000  | -2.240313000 | -0.789887000 |
| 1 | 5.501712000   | 2.248248000  | 5.339979000  |
| 1 | -2.964715000  | -6.023803000 | -1.417004000 |
| 1 | -4.122343000  | -5.229190000 | -0.312820000 |
| 1 | -3.884992000  | -4.593542000 | -1.963120000 |
| 1 | 7.648924000   | -3.091157000 | -3.373298000 |
| 1 | 6.870996000   | -2.728862000 | -4.923519000 |
| 1 | 6.588041000   | -1.683062000 | -3.519769000 |

|   |               |              |              |
|---|---------------|--------------|--------------|
| 1 | 5.700781000   | -4.619625000 | -3.760415000 |
| 1 | 4.630678000   | -3.253003000 | -3.960120000 |
| 1 | -12.152535000 | 0.551642000  | -0.295581000 |
| 1 | -11.727362000 | 1.397961000  | 1.196770000  |
| 1 | -11.439966000 | 2.169197000  | -0.361383000 |
| 1 | 5.371175000   | 2.040660000  | 1.042706000  |
| 1 | 5.125844000   | -3.710733000 | 1.906327000  |
| 1 | 6.346583000   | -3.911735000 | 0.651114000  |
| 1 | 4.792099000   | -4.745351000 | 0.514446000  |
| 1 | 1.711823000   | 4.457423000  | -4.280494000 |
| 1 | 0.121212000   | 3.711732000  | -4.127271000 |
| 1 | 3.313547000   | 1.030235000  | 5.479260000  |
| 1 | 6.501638000   | 2.738912000  | 3.139756000  |
| 1 | 0.586225000   | 5.035291000  | 1.486886000  |
| 1 | 1.018674000   | 5.995026000  | 0.065431000  |
| 1 | -0.528926000  | 5.145440000  | 0.127056000  |
| 1 | -0.934890000  | 6.003246000  | -4.091995000 |
| 1 | 0.674582000   | 6.735853000  | -4.241624000 |
| 1 | 0.014797000   | 5.748954000  | -5.559319000 |
| 7 | -5.233220000  | -0.494024000 | 0.395349000  |
| 7 | -6.201933000  | -1.172904000 | -0.017433000 |
| 7 | 5.260871000   | -3.619441000 | -2.017698000 |
| 1 | 0.868173000   | -1.633268000 | 0.884523000  |
| 1 | 0.100635000   | 5.319288000  | -2.006230000 |
| 1 | 5.844530000   | -4.240882000 | -1.480303000 |

**S1 of the Al-complex**

|    |              |              |              |
|----|--------------|--------------|--------------|
| 13 | 0.175007000  | 0.571681000  | -0.219133000 |
| 8  | -0.988574000 | -0.892804000 | 0.637186000  |
| 8  | 1.271814000  | -0.853452000 | -0.862249000 |
| 8  | 1.479004000  | 1.873363000  | -0.525252000 |

|   |              |              |              |
|---|--------------|--------------|--------------|
| 8 | -1.157555000 | 1.792728000  | 0.205411000  |
| 8 | 4.938979000  | -1.011506000 | 1.240823000  |
| 7 | 0.901543000  | 0.459738000  | 1.698317000  |
| 7 | -0.623286000 | 0.319021000  | -2.018819000 |
| 8 | -5.141738000 | -0.863994000 | -0.927831000 |
| 7 | 0.248520000  | -0.495938000 | 2.473785000  |
| 7 | -0.008081000 | -0.684334000 | -2.798430000 |
| 8 | -2.633831000 | 3.650722000  | 1.413860000  |
| 8 | 3.008807000  | 3.679610000  | -1.760378000 |
| 7 | 5.395370000  | 4.446376000  | 2.538508000  |
| 7 | 5.737465000  | 5.665072000  | 2.558542000  |
| 6 | -0.740512000 | -1.193805000 | 1.848304000  |
| 7 | 7.005517000  | 2.260271000  | -1.637306000 |
| 6 | 1.851205000  | 1.180945000  | 2.249418000  |
| 1 | 2.100568000  | 1.000954000  | 3.297198000  |
| 6 | 2.600500000  | 2.192299000  | 1.579493000  |
| 7 | 2.662024000  | -4.027750000 | 4.234141000  |
| 6 | 0.969807000  | -1.245618000 | -2.094979000 |
| 6 | 3.628766000  | -2.190798000 | -0.982268000 |
| 6 | -1.458978000 | -2.239050000 | 2.602240000  |
| 7 | -5.336136000 | 4.050906000  | -2.711535000 |
| 6 | 3.447364000  | -2.719082000 | 0.311316000  |
| 6 | 4.491279000  | -1.080634000 | -1.167800000 |
| 6 | 2.957257000  | -2.819809000 | -2.165722000 |
| 6 | 1.729836000  | -2.358827000 | -2.704030000 |
| 6 | 4.345671000  | 3.884341000  | 1.721778000  |
| 6 | 5.152089000  | -0.494852000 | -0.039246000 |
| 6 | -2.131374000 | 2.336008000  | -0.502451000 |
| 6 | 2.380581000  | 2.489951000  | 0.193813000  |
| 6 | -2.403026000 | 1.966129000  | -1.858850000 |
| 6 | -1.638023000 | 0.956283000  | -2.540952000 |

|   |              |              |              |
|---|--------------|--------------|--------------|
| 1 | -1.928537000 | 0.686340000  | -3.555402000 |
| 6 | 2.611082000  | -3.846855000 | 0.601569000  |
| 1 | 2.140826000  | -4.352004000 | -0.233981000 |
| 6 | 2.384792000  | -4.301660000 | 1.876182000  |
| 6 | 4.087867000  | -2.095942000 | 1.436649000  |
| 6 | -0.796956000 | -2.914766000 | 3.648165000  |
| 1 | 0.256186000  | -2.738850000 | 3.842801000  |
| 6 | 4.159246000  | 4.174062000  | 0.338979000  |
| 1 | 4.795432000  | 4.906800000  | -0.137700000 |
| 6 | 1.203678000  | -2.986794000 | -3.850519000 |
| 1 | 0.264837000  | -2.618307000 | -4.245080000 |
| 7 | -6.152518000 | 4.818451000  | -2.104996000 |
| 6 | -2.798266000 | -2.582967000 | 2.281125000  |
| 6 | 2.993607000  | -3.606555000 | 3.017361000  |
| 7 | -6.747109000 | 2.598455000  | 2.023005000  |
| 6 | 3.605036000  | 2.876391000  | 2.311041000  |
| 1 | 3.805697000  | 2.616442000  | 3.345282000  |
| 6 | 3.220691000  | 3.488378000  | -0.411029000 |
| 6 | -3.577835000 | -1.959847000 | 1.161769000  |
| 6 | 1.863815000  | -4.055743000 | -4.454527000 |
| 1 | 1.436382000  | -4.527403000 | -5.333128000 |
| 6 | 6.234118000  | 1.192863000  | -1.429437000 |
| 7 | -3.433911000 | -4.166130000 | -4.002926000 |
| 6 | 4.751238000  | -0.481133000 | -2.440418000 |
| 1 | 4.266135000  | -0.907552000 | -3.310246000 |
| 6 | -2.963270000 | 3.336798000  | 0.105587000  |
| 6 | 3.884213000  | -2.507775000 | 2.726000000  |
| 1 | 4.401166000  | -1.984909000 | 3.520236000  |
| 6 | -4.384924000 | -0.826808000 | 1.404294000  |
| 6 | -4.268859000 | 3.527318000  | -1.934059000 |
| 6 | 5.994524000  | 0.578728000  | -0.147885000 |

|   |              |              |              |
|---|--------------|--------------|--------------|
| 1 | 6.448279000  | 0.972933000  | 0.751651000  |
| 6 | -4.332851000 | -1.971873000 | -1.182026000 |
| 6 | -3.547244000 | -2.544682000 | -0.125607000 |
| 6 | 3.072593000  | -4.518024000 | -3.920668000 |
| 1 | 3.594404000  | -5.350910000 | -4.380797000 |
| 6 | -3.471780000 | 2.577058000  | -2.553327000 |
| 1 | -3.693712000 | 2.299995000  | -3.578313000 |
| 6 | 3.610268000  | -3.899181000 | -2.789533000 |
| 1 | 4.553220000  | -4.247150000 | -2.379536000 |
| 6 | -2.751663000 | -3.684721000 | -0.467086000 |
| 1 | -2.143312000 | -4.132832000 | 0.309972000  |
| 6 | -1.448842000 | -3.895304000 | 4.395517000  |
| 1 | -0.908731000 | -4.416725000 | 5.177543000  |
| 6 | -5.172348000 | -0.273886000 | 0.336348000  |
| 6 | -4.001983000 | 3.916603000  | -0.596023000 |
| 1 | -4.636959000 | 4.672640000  | -0.155084000 |
| 6 | 1.535367000  | -5.516302000 | 2.136501000  |
| 1 | 1.150680000  | -5.932688000 | 1.200437000  |
| 1 | 0.691892000  | -5.280654000 | 2.792897000  |
| 1 | 2.114087000  | -6.289495000 | 2.654872000  |
| 6 | -2.779395000 | -4.212980000 | 4.106387000  |
| 1 | -3.298538000 | -4.972260000 | 4.681595000  |
| 6 | -2.712450000 | -4.215047000 | -1.733512000 |
| 6 | -4.478002000 | -0.164609000 | 2.672292000  |
| 1 | -3.905702000 | -0.567280000 | 3.500559000  |
| 6 | 5.574638000  | 0.608502000  | -2.597800000 |
| 6 | -3.517865000 | -3.612011000 | -2.798320000 |
| 6 | 7.741073000  | 2.845398000  | -0.511838000 |
| 1 | 8.439409000  | 2.125551000  | -0.058002000 |
| 1 | 7.077815000  | 3.200322000  | 0.291196000  |
| 6 | -5.251873000 | 0.950720000  | 2.876722000  |



|   |              |              |              |
|---|--------------|--------------|--------------|
| 6 | -5.968311000 | 0.825244000  | 0.497807000  |
| 1 | -6.515366000 | 1.195597000  | -0.358555000 |
| 6 | -3.437624000 | -3.564957000 | 3.056833000  |
| 1 | -4.464584000 | -3.822391000 | 2.821265000  |
| 6 | -6.037607000 | 1.504317000  | 1.769484000  |
| 6 | -4.330195000 | -2.469787000 | -2.455813000 |
| 1 | -4.946328000 | -1.982835000 | -3.200084000 |
| 6 | 3.283718000  | -3.393898000 | 5.401340000  |
| 1 | 3.085176000  | -2.310029000 | 5.459433000  |
| 1 | 2.885453000  | -3.858329000 | 6.306284000  |
| 6 | -1.845495000 | -5.398713000 | -2.064138000 |
| 1 | -1.352336000 | -5.787390000 | -1.167684000 |
| 1 | -1.076892000 | -5.123635000 | -2.795393000 |
| 1 | -2.433159000 | -6.198017000 | -2.526904000 |
| 6 | -3.448024000 | 4.640496000  | 2.100780000  |
| 1 | -3.404645000 | 5.611132000  | 1.591796000  |
| 1 | -3.006011000 | 4.727787000  | 3.092958000  |
| 1 | -4.490198000 | 4.309824000  | 2.181681000  |
| 6 | -7.597307000 | 3.177030000  | 0.978833000  |
| 1 | -8.233558000 | 2.430091000  | 0.479543000  |
| 1 | -7.003947000 | 3.679329000  | 0.198698000  |
| 6 | 5.823971000  | 1.209610000  | -3.954158000 |
| 1 | 5.310287000  | 0.640782000  | -4.734609000 |
| 1 | 6.895311000  | 1.240163000  | -4.178849000 |
| 1 | 5.475661000  | 2.247384000  | -3.993097000 |
| 6 | 3.908074000  | 4.565951000  | -2.482431000 |
| 1 | 3.829960000  | 5.596680000  | -2.114592000 |
| 1 | 3.571182000  | 4.522476000  | -3.517053000 |
| 1 | 4.944420000  | 4.215477000  | -2.407831000 |
| 6 | -5.325921000 | 1.617505000  | 4.223143000  |
| 1 | -4.722082000 | 1.080950000  | 4.961528000  |

|   |              |              |              |
|---|--------------|--------------|--------------|
| 1 | -6.360837000 | 1.669172000  | 4.577609000  |
| 1 | -4.974778000 | 2.653371000  | 4.166697000  |
| 6 | -4.210189000 | -3.603213000 | -5.110085000 |
| 1 | -5.293833000 | -3.624184000 | -4.914437000 |
| 1 | -3.936306000 | -2.557501000 | -5.320184000 |
| 1 | 0.477694000  | -0.605232000 | 3.452706000  |
| 6 | 4.991569000  | 6.723199000  | 1.800298000  |
| 1 | 5.551367000  | 6.974232000  | 0.891681000  |
| 1 | 3.962396000  | 6.457258000  | 1.536493000  |
| 1 | 4.999847000  | 7.604306000  | 2.445483000  |
| 6 | -7.222921000 | 5.334685000  | -2.977632000 |
| 1 | -7.134415000 | 4.954328000  | -4.001210000 |
| 1 | -8.189103000 | 5.048899000  | -2.547105000 |
| 1 | -7.171160000 | 6.429402000  | -2.975260000 |
| 1 | -8.245791000 | 3.926441000  | 1.438960000  |
| 1 | -4.015797000 | -4.192702000 | -6.008492000 |
| 1 | 4.377716000  | -3.518684000 | 5.408697000  |
| 1 | 8.321297000  | 3.694910000  | -0.878172000 |
